# Supplementary material for: Chronic alcohol-induced brain states limit propagation of direct cortical stimulation
Source: Sci Rep. 2025 Oct 10;15:35407. doi: 10.1038/s41598-025-21802-z (PMC12514308; doi:10.1038/s41598-025-21802-z)
Supplement: Supplementary file 1 — Supplementary Material 1 [file 41598_2025_21802_MOESM1_ESM.xlsx]

## Sheet: Sheet1
vars	group1	group2	group3	n	mean	sd	median	trimmed	mad	min	max	range	skew	kurtosis	se
LatP1.	Control	prestim	PR	10	57.12	5.48	55.27	57.07	5.19	48.67	66	17.33	0.22	-1.39	1.73
LatP1.	Alcohol	prestim	PR	10	55.76	5.26	56	55.69	3.55	46	66	20	0.09	-0.3	1.66
LatP1.	Control	stim	PR	10	54.55	2.32	55	54.82	0.6	49.33	57.67	8.33	-0.97	0.06	0.73
LatP1.	Alcohol	stim	PR	10	56.04	8.14	53.24	53.92	2.59	51	78	27	1.89	2.35	2.57
LatP1.	Control	prestim	MR	10	56.77	6.67	53.17	55.71	1.48	52	70	18	1.04	-0.73	2.11
LatP1.	Alcohol	prestim	MR	10	52.03	11.79	53.5	54.12	6.92	22	65.33	43.33	-1.47	1.41	3.73
LatP1.	Control	stim	MR	10	54.75	2.62	54.93	54.85	0.69	49.33	59.33	10	-0.36	-0.12	0.83
LatP1.	Alcohol	stim	MR	10	56.76	7.74	54.17	54.83	3.05	51.33	77.67	26.33	1.88	2.37	2.45
LatP1.	Control	prestim	FR	10	58.45	5.52	56.92	58.1	5.19	52.33	67.33	15	0.43	-1.57	1.75
LatP1.	Alcohol	prestim	FR	10	54.4	4.09	53.5	54.67	4.7	47	59.67	12.67	-0.22	-1.26	1.29
LatP1.	Control	stim	FR	10	55.55	1.8	55.72	55.56	0.83	52.33	58.67	6.33	-0.13	-0.75	0.57
LatP1.	Alcohol	stim	FR	10	54.55	1.15	54.7	54.69	0.05	51.67	56.33	4.67	-1.2	1.56	0.36
LatP1.	Control	prestim	FC	10	59.27	6.81	56.17	58.75	4.69	52.67	70	17.33	0.46	-1.69	2.15
LatP1.	Alcohol	prestim	FC	10	54.6	4.03	53.5	54.87	3.46	47	60	13	-0.23	-1.13	1.28
LatP1.	Control	stim	FC	10	54.96	2.72	55.32	55.03	1.73	49.67	59.67	10	-0.26	-0.52	0.86
LatP1.	Alcohol	stim	FC	10	53.45	1.18	53.19	53.4	0.71	51.67	55.67	4	0.46	-0.84	0.37
LatP1.	Control	prestim	PC	10	57.66	6.71	57.16	57.41	8.88	48.33	69	20.67	0.17	-1.49	2.12
LatP1.	Alcohol	prestim	PC	10	54.33	3.93	53.17	54.58	4.2	47	59.67	12.67	-0.22	-1.16	1.24
LatP1.	Control	stim	PC	10	54.8	2.45	55.19	55.17	1.48	49	57.67	8.67	-1.14	0.44	0.78
LatP1.	Alcohol	stim	PC	10	56.57	7.37	54.85	54.75	2.97	51	76.67	25.67	1.93	2.58	2.33
LatP1.	Control	prestim	MC	10	56.6	6.28	54.66	55.83	3.69	50.33	69	18.67	0.91	-0.8	1.98
LatP1.	Alcohol	prestim	MC	10	53.39	4.56	51.83	53.33	1.75	46	61.33	15.33	0.32	-1.03	1.44
LatP1.	Control	stim	MC	10	54.19	2.42	53.86	54.11	1.98	50.33	58.67	8.33	0.27	-0.9	0.77
LatP1.	Alcohol	stim	MC	10	57.14	8.11	55.39	55.14	3.79	51.33	79	27.67	1.86	2.33	2.57
LatP1.	Control	prestim	FL	10	58.47	6.28	54.67	58	2.47	52	68.67	16.67	0.6	-1.46	1.99
LatP1.	Alcohol	prestim	FL	10	54.87	4.35	53.5	55.17	3.71	46.67	60.67	14	-0.2	-1.09	1.38
LatP1.	Control	stim	FL	10	54.72	2.52	55.17	54.73	1.06	50	59.33	9.33	-0.15	-0.47	0.8
LatP1.	Alcohol	stim	FL	10	57.18	7.47	55	55.39	2.97	51.33	77.33	26	1.87	2.36	2.36
LatP1.	Control	prestim	ML	10	57.6	4.64	56.83	57	2.97	51.67	68.33	16.67	0.95	0.27	1.47
LatP1.	Alcohol	prestim	ML	10	54.9	4.38	53.5	54.92	3.71	47.67	62	14.33	0.12	-1.3	1.38
LatP1.	Control	stim	ML	10	54.58	2.71	55	54.56	0.85	49.33	60	10.67	-0.01	0.09	0.86
LatP1.	Alcohol	stim	ML	10	57.13	8.07	55.65	55.08	2.22	51.33	79.33	28	2	2.78	2.55
LatP1.	Control	prestim	PL	10	55.37	7.46	54.33	55.71	3.71	40	68	28	-0.3	-0.29	2.36
LatP1.	Alcohol	prestim	PL	10	54.97	5.12	54	54.67	4.94	47.67	64.67	17	0.38	-1.06	1.62
LatP1.	Control	stim	PL	10	54.99	2.71	55.07	55.07	1.13	49.33	60	10.67	-0.32	0.12	0.86
LatP1.	Alcohol	stim	PL	10	56.7	7.94	54.78	54.63	2.97	51.33	78.67	27.33	2.04	2.88	2.51
LatN1.	Control	prestim	PR	10	96.33	11.51	92.33	95.71	10.38	82	115.67	33.67	0.51	-1.34	3.64
LatN1.	Alcohol	prestim	PR	10	82.39	22.36	76.5	77.28	9.14	63	142.67	79.67	1.85	2.37	7.07
LatN1.	Control	stim	PR	10	86.62	8.57	90.29	87.61	2.76	68.67	96.67	28	-0.85	-0.68	2.71
LatN1.	Alcohol	stim	PR	10	79.06	9.99	73.83	77.66	1.73	72	97.33	25.33	1.03	-0.82	3.16
LatN1.	Control	prestim	MR	10	96.7	13.52	92.67	96.17	14.08	79	118.67	39.67	0.4	-1.42	4.28
LatN1.	Alcohol	prestim	MR	10	76.9	9.18	76.83	76.83	10.38	63	91.33	28.33	0.01	-1.5	2.9
LatN1.	Control	stim	MR	10	90.97	11.99	89.96	90.05	3.76	71.33	118	46.67	0.66	0.37	3.79
LatN1.	Alcohol	stim	MR	10	79.99	9.46	76.1	78.86	4.94	72	97	25	0.95	-0.85	2.99
LatN1.	Control	prestim	FR	10	92.31	10.7	90.56	90.27	5.34	81	120	39	1.54	1.66	3.39
LatN1.	Alcohol	prestim	FR	10	80.13	14.91	78.83	77.46	9.39	64	117.67	53.67	1.38	1.23	4.71
LatN1.	Control	stim	FR	10	89.07	7.98	91.67	90.59	2.33	70	96	26	-1.35	0.52	2.52
LatN1.	Alcohol	stim	FR	10	78.54	6.37	77.47	77.38	3.16	72.67	93.67	21	1.25	0.44	2.02
LatN1.	Control	prestim	FC	10	96.6	11.47	93.17	95.29	4.2	83.67	120	36.33	1.01	-0.5	3.63
LatN1.	Alcohol	prestim	FC	10	74.43	7.72	71.84	74.25	7.16	63.67	86.67	23	0.32	-1.44	2.44
LatN1.	Control	stim	FC	10	88.05	7.6	89.62	88.35	6	74.33	99.33	25	-0.38	-1.14	2.4
LatN1.	Alcohol	stim	FC	10	76.99	6.73	75.47	75.48	2.18	71.33	94.67	23.33	1.72	1.85	2.13
LatN1.	Control	prestim	PC	10	95.77	9.93	93.28	94.38	6.85	84	118.67	34.67	0.99	0.18	3.14
LatN1.	Alcohol	prestim	PC	10	75.43	8.87	71.83	75.12	9.64	63.33	90	26.67	0.28	-1.57	2.8
LatN1.	Control	stim	PC	10	84.91	7.94	85.36	85.43	7.13	68.33	97.33	29	-0.51	-0.41	2.51
LatN1.	Alcohol	stim	PC	10	77.66	8.37	74.67	76.53	2.11	70	94.33	24.33	1.16	-0.46	2.65
LatN1.	Control	prestim	MC	10	90.28	10.69	89.08	89.06	9.39	76.33	114	37.67	0.77	-0.14	3.38
LatN1.	Alcohol	prestim	MC	10	77.04	15.82	70.17	73.72	6.88	63.33	117.33	54	1.53	1.31	5
LatN1.	Control	stim	MC	10	86.81	7.44	86.86	87.22	7.66	72.33	98	25.67	-0.41	-0.84	2.35
LatN1.	Alcohol	stim	MC	10	79.37	9.26	75.65	78.17	4.42	72	96.33	24.33	0.96	-0.86	2.93
LatN1.	Control	prestim	FL	10	97.53	11.38	93.83	96.58	5.93	82.67	120	37.33	0.72	-0.82	3.6
LatN1.	Alcohol	prestim	FL	10	79.77	16	75.33	77.17	13.59	63	117.33	54.33	1.09	0.27	5.06
LatN1.	Control	stim	FL	10	88.05	6.65	89.97	88.82	4.49	74.33	95.67	21.33	-0.86	-0.65	2.1
LatN1.	Alcohol	stim	FL	10	80.44	9.74	76.68	79.46	6.95	71.67	97	25.33	0.72	-1.19	3.08
LatN1.	Control	prestim	ML	10	97.67	10.9	94.33	97.13	6.72	82.33	117.33	35	0.52	-1.09	3.45
LatN1.	Alcohol	prestim	ML	10	80.2	15.85	76.5	77.58	13.1	64	117.33	53.33	1.07	0.26	5.01
LatN1.	Control	stim	ML	10	87.65	7.53	88.79	88.15	4.02	71.67	99.67	28	-0.63	-0.18	2.38
LatN1.	Alcohol	stim	ML	10	80.7	10.63	76.84	80.21	6.44	69	96.33	27.33	0.48	-1.66	3.36
LatN1.	Control	prestim	PL	10	95.8	9.33	93.35	95.21	6.45	83.67	112.67	29	0.55	-1.19	2.95
LatN1.	Alcohol	prestim	PL	10	81	15.65	77.67	78.58	12.6	64	117.33	53.33	1.04	0.18	4.95
LatN1.	Control	stim	PL	10	82.49	6.05	83.06	82.86	3.8	70	92	22	-0.3	-0.28	1.91
LatN1.	Alcohol	stim	PL	10	82.4	9.82	83.17	82.26	15.07	70	96	26	0.15	-1.75	3.1
LatP2.	Control	prestim	PR	10	144.88	30.64	137.83	142.89	24.96	104	201.67	97.67	0.49	-1.16	9.69
LatP2.	Alcohol	prestim	PR	10	120.24	46.28	105.33	111.51	14.33	79.33	231	151.67	1.34	0.53	14.63
LatP2.	Control	stim	PR	10	125.99	16.51	125.05	125.57	7.49	94.33	161	66.67	0.26	0.39	5.22
LatP2.	Alcohol	stim	PR	10	103.82	6.96	102.56	103.02	6.42	95	119	24	0.78	-0.29	2.2
LatP2.	Control	prestim	MR	10	150.13	34.11	146.17	148.92	43.98	105	205	100	0.1	-1.53	10.79
LatP2.	Alcohol	prestim	MR	10	116.27	46.62	100.34	107.58	22.24	70	232	162	1.41	0.98	14.74
LatP2.	Control	stim	MR	10	127.81	16.77	128.64	127.34	7.31	95.33	164	68.67	0.27	0.58	5.3
LatP2.	Alcohol	stim	MR	10	105.31	6.27	107.96	105.47	3.08	96	113.33	17.33	-0.49	-1.54	1.98
LatP2.	Control	prestim	FR	10	142.19	25.47	146.31	142.37	23.19	103	180	77	-0.19	-1.3	8.05
LatP2.	Alcohol	prestim	FR	10	114.47	40.11	102.17	108.13	17.79	70	209.67	139.67	1.21	0.47	12.69
LatP2.	Control	stim	FR	10	133.49	13.23	132	130.87	3.08	120	168	48	1.57	1.84	4.18
LatP2.	Alcohol	stim	FR	10	107.82	7.77	108.28	107.32	0.74	94.67	125	30.33	0.46	0.35	2.46
LatP2.	Control	prestim	FC	10	147.37	31.92	143.5	145.5	32.12	105	204.67	99.67	0.26	-1.24	10.1
LatP2.	Alcohol	prestim	FC	10	117.63	45.05	106.17	108.12	10.63	79.33	232	152.67	1.55	1.3	14.25
LatP2.	Control	stim	FC	10	129.98	17.54	131.69	129.39	2.68	96.67	168	71.33	0.31	0.52	5.55
LatP2.	Alcohol	stim	FC	10	103.88	5.55	105.21	104.97	0.43	90	109	19	-1.45	1.11	1.75
LatP2.	Control	prestim	PC	10	134.24	21.92	127.39	131.55	14.16	110	180	70	0.83	-0.68	6.93
LatP2.	Alcohol	prestim	PC	10	118.97	43.74	106.83	110.21	16.8	79.67	228.33	148.66	1.44	1.08	13.83
LatP2.	Control	stim	PC	10	124.66	17.54	124.93	124.12	8.9	92.67	161	68.33	0.25	0.02	5.55
LatP2.	Alcohol	stim	PC	10	103.19	6.75	103.26	103.65	7.91	90	112.67	22.67	-0.41	-0.92	2.13
LatP2.	Control	prestim	MC	10	136.17	33.64	126.52	131.21	28.2	105	207	102	0.94	-0.55	10.64
LatP2.	Alcohol	prestim	MC	10	107.59	36.85	99.5	98.62	11.51	79	208	129	1.93	2.58	11.65
LatP2.	Control	stim	MC	10	127.14	16.13	126.77	126.46	7.17	97	162.67	65.67	0.41	0.59	5.1
LatP2.	Alcohol	stim	MC	10	104.73	5.67	106.33	104.83	7.43	97	111.67	14.67	-0.17	-1.86	1.79
LatP2.	Control	prestim	FL	10	147.17	34.03	142.83	145.29	42.75	105	204.33	99.33	0.26	-1.5	10.76
LatP2.	Alcohol	prestim	FL	10	116.07	38.35	106	109	11.37	79.33	209.33	130	1.36	0.72	12.13
LatP2.	Control	stim	FL	10	130	17.6	131.67	129.42	3.45	96.67	168	71.33	0.3	0.48	5.57
LatP2.	Alcohol	stim	FL	10	106.09	6.7	108.45	105.74	1.98	96.67	118.33	21.67	0.01	-1.06	2.12
LatP2.	Control	prestim	ML	10	139.73	32.88	130.46	135.57	24.41	105	207.67	102.67	0.83	-0.7	10.4
LatP2.	Alcohol	prestim	ML	10	119.7	44.56	107.83	110.63	15.08	79.67	232.33	152.66	1.51	1.23	14.09
LatP2.	Control	stim	ML	10	127.83	18.12	128.07	127.03	7.81	94	168	74	0.43	0.64	5.73
LatP2.	Alcohol	stim	ML	10	106.9	7.07	108.83	106.67	2.97	96	119.67	23.67	-0.03	-1.01	2.24
LatP2.	Control	prestim	PL	10	137.46	33.66	123.83	132.82	17.05	105	207	102	0.89	-0.72	10.64
LatP2.	Alcohol	prestim	PL	10	117.57	38.29	107.33	110.79	14.58	80	209.33	129.33	1.27	0.55	12.11
LatP2.	Control	stim	PL	10	125.63	16.35	126.44	125.75	6.36	91.67	158.67	67	-0.06	0.54	5.17
LatP2.	Alcohol	stim	PL	10	112.3	11.7	109.85	110.42	3.98	99	140.67	41.67	1.29	0.72	3.7
LatN2.	Control	prestim	PR	10	166.92	39.58	156.67	163.56	24.46	112.33	248.33	136	0.67	-0.67	12.52
LatN2.	Alcohol	prestim	PR	10	170.52	79	145.41	159.56	38.55	100	328.67	228.67	1.08	-0.55	24.98
LatN2.	Control	stim	PR	10	141.39	15.93	141.27	141.11	8.33	110.67	174.33	63.67	0.18	0.24	5.04
LatN2.	Alcohol	stim	PR	10	121.67	20.68	114.79	116.84	4.82	106.67	175.33	68.67	1.69	1.63	6.54
LatN2.	Control	prestim	MR	10	168.87	41.72	164.5	166.5	41.51	110	246.67	136.67	0.24	-1.05	13.19
LatN2.	Alcohol	prestim	MR	10	166.1	68.9	138.67	157.46	38.3	109.67	291.67	182	0.91	-0.9	21.79
LatN2.	Control	stim	MR	10	142.14	15.54	142.2	142.25	8.9	110.33	173	62.67	-0.08	0.33	4.91
LatN2.	Alcohol	stim	MR	10	119.85	17.14	113.22	116.98	9.14	105	157.67	52.67	1.12	-0.22	5.42
LatN2.	Control	prestim	FR	10	158.57	32.08	158.7	159.01	35.58	110	203.67	93.67	-0.15	-1.39	10.14
LatN2.	Alcohol	prestim	FR	10	165.43	68.41	138.33	156.92	37.06	108.67	290.33	181.66	0.92	-0.87	21.63
LatN2.	Control	stim	FR	10	143.47	10.77	140.49	141.33	7.91	134	170	36	1.32	0.86	3.41
LatN2.	Alcohol	stim	FR	10	122.11	15.61	118.34	119.35	8.65	109.33	157	47.67	1.2	-0.06	4.94
LatN2.	Control	prestim	FC	10	166.27	41.05	161.5	164.21	47.2	110	239	129	0.21	-1.29	12.98
LatN2.	Alcohol	prestim	FC	10	164.8	67.3	139	155.29	30.64	115.67	290	174.33	1.11	-0.6	21.28
LatN2.	Control	stim	FC	10	139.5	15.11	138.74	139.37	7.03	110	170	60	0.11	0.15	4.78
LatN2.	Alcohol	stim	FC	10	117.12	17.73	111.38	111.78	2.04	109.67	167.33	57.67	2.24	3.45	5.61
LatN2.	Control	prestim	PC	10	156.74	28.69	150.67	156.21	15.57	110	207.67	97.67	0.4	-0.82	9.07
LatN2.	Alcohol	prestim	PC	10	170.43	75.53	145.5	157.37	40.77	116	329.33	213.33	1.13	-0.4	23.88
LatN2.	Control	stim	PC	10	139.54	15.44	138.04	138.8	4.45	111	174	63	0.49	0.66	4.88
LatN2.	Alcohol	stim	PC	10	128.56	18.68	121.91	126.37	10	110.33	164.33	54	0.86	-0.94	5.91
LatN2.	Control	prestim	MC	10	166.52	41.21	158.79	164.36	48.99	110	240.33	130.33	0.17	-1.15	13.03
LatN2.	Alcohol	prestim	MC	10	151.85	50.4	139.73	139.35	25.45	116	287.67	171.67	1.86	2.34	15.94
LatN2.	Control	stim	MC	10	146.45	16.03	148.23	147.52	6.02	111.67	172.67	61	-0.53	0.05	5.07
LatN2.	Alcohol	stim	MC	10	130.89	25.89	122.87	128.11	17.59	105	179	74	0.81	-0.97	8.19
LatN2.	Control	prestim	FL	10	167	40.5	161.67	165	44.97	110	240	130	0.19	-1.16	12.81
LatN2.	Alcohol	prestim	FL	10	169.4	66.57	147.83	161.08	43.49	115	290.33	175.33	0.95	-0.82	21.05
LatN2.	Control	stim	FL	10	146.91	32.85	140.37	140.51	9.39	110	235	125	1.77	2.34	10.39
LatN2.	Alcohol	stim	FL	10	128.26	25.03	115.5	124.62	12.6	105	180.67	75.67	0.87	-0.74	7.92
LatN2.	Control	prestim	ML	10	169.17	39.61	169.36	168.01	40.77	110	237.67	127.67	0.01	-1.17	12.53
LatN2.	Alcohol	prestim	ML	10	167.97	62.97	152	159.33	48.68	115	290	175	0.91	-0.81	19.91
LatN2.	Control	stim	ML	10	141.45	14.92	143.33	141.81	7.06	110	170	60	-0.24	0.33	4.72
LatN2.	Alcohol	stim	ML	10	132.19	22.75	128.48	128.86	21.25	111	180	69	0.78	-0.68	7.2
LatN2.	Control	prestim	PL	10	162.94	38.48	159.17	161.22	41.76	110	229.67	119.67	0.13	-1.3	12.17
LatN2.	Alcohol	prestim	PL	10	166.83	67.06	146.83	157.87	41.76	115	290.33	175.33	1.02	-0.71	21.21
LatN2.	Control	stim	PL	10	148.32	28.1	145.56	143.99	4.69	110	221.33	111.33	1.49	1.91	8.88
LatN2.	Alcohol	stim	PL	10	129.42	17.98	126.2	127.57	16.8	111.33	162.33	51	0.7	-1.09	5.69
LatP3.	Control	prestim	PR	10	282.95	74.1	264.42	275.31	52.52	193.67	433.33	239.67	0.74	-0.8	23.43
LatP3.	Alcohol	prestim	PR	10	284.51	79.95	277.72	284.68	103.61	169	398.67	229.67	0.11	-1.6	25.28
LatP3.	Control	stim	PR	10	328.22	82.39	349.86	327.19	76.11	185.33	479.33	294	0.02	-0.83	26.05
LatP3.	Alcohol	stim	PR	10	266.82	91.96	261.08	264.36	128.74	153.33	400	246.67	0.2	-1.63	29.08
LatP3.	Control	prestim	MR	10	307.9	70.66	302.83	305.67	76.85	201.33	432.33	231	0.16	-1.28	22.34
LatP3.	Alcohol	prestim	MR	10	318.37	116.61	281.33	302.58	116.14	190	573	383	0.83	-0.43	36.88
LatP3.	Control	stim	MR	10	333.49	91.23	338.04	333.86	79.81	185	479	294	-0.24	-1.13	28.85
LatP3.	Alcohol	stim	MR	10	244.55	83.16	219.11	236.65	75.03	152.67	399.67	247	0.63	-1.13	26.3
LatP3.	Control	prestim	FR	10	312.43	60.88	324.14	317.87	66.67	191.67	389.67	198	-0.53	-0.97	19.25
LatP3.	Alcohol	prestim	FR	10	308.97	119.7	279.17	295.17	80.55	155	573.33	418.33	0.84	-0.23	37.85
LatP3.	Control	stim	FR	10	344.39	77.27	343.21	345.03	79.81	205.67	478	272.33	-0.06	-0.89	24.43
LatP3.	Alcohol	stim	FR	10	342.49	72.23	361.65	346.41	14.23	212.67	441	228.33	-0.8	-0.68	22.84
LatP3.	Control	prestim	FC	10	307.27	84.24	298.67	305.08	120.58	200.33	431.67	231.33	0	-1.71	26.64
LatP3.	Alcohol	prestim	FC	10	299.7	125.6	277	286.21	109.71	136.33	571	434.67	0.74	-0.4	39.72
LatP3.	Control	stim	FC	10	328.98	93.06	338.25	328.52	91.3	184	477.67	293.67	-0.09	-1.34	29.43
LatP3.	Alcohol	stim	FC	10	266.28	82.07	252.93	264.89	50.9	143.67	400	256.33	0.34	-1.04	25.95
LatP3.	Control	prestim	PC	10	259.19	56.59	266.95	256.74	86.49	191.67	346.33	154.67	0.13	-1.67	17.9
LatP3.	Alcohol	prestim	PC	10	300.97	125.83	275.67	286.58	110.7	145.33	571.67	426.34	0.75	-0.47	39.79
LatP3.	Control	stim	PC	10	351.22	68.45	352.61	346.32	68.78	262.33	479.33	217	0.23	-1.04	21.65
LatP3.	Alcohol	stim	PC	10	301.55	71.7	313.94	299.98	119.6	217	398.67	181.67	0.02	-1.8	22.67
LatP3.	Control	prestim	MC	10	316.57	68.23	324.34	317.59	64.74	191.33	433.67	242.33	-0.14	-0.85	21.58
LatP3.	Alcohol	prestim	MC	10	285.72	65.77	256.42	279.15	53.25	219.67	404.33	184.66	0.64	-1.26	20.8
LatP3.	Control	stim	MC	10	343.53	79.33	350.61	345.96	66.31	189	478.67	289.67	-0.27	-0.58	25.09
LatP3.	Alcohol	stim	MC	10	280.58	87.51	293.38	279.97	128.06	162.67	403.33	240.67	0.09	-1.65	27.67
LatP3.	Control	prestim	FL	10	305.43	79.81	299.17	301.42	84.76	195	448	253	0.19	-1.19	25.24
LatP3.	Alcohol	prestim	FL	10	299.23	129.62	276.83	285.83	110.21	134	571.67	437.67	0.63	-0.56	40.99
LatP3.	Control	stim	FL	10	354.02	97.4	381.26	359.06	67.32	188	479.67	291.67	-0.58	-1.2	30.8
LatP3.	Alcohol	stim	FL	10	267.93	93.73	256.63	264.62	128.94	162.67	399.67	237	0.21	-1.75	29.64
LatP3.	Control	prestim	ML	10	301.68	76	297.23	298.06	69.19	194.33	438	243.67	0.11	-1.09	24.03
LatP3.	Alcohol	prestim	ML	10	317.77	110.49	279.33	298.88	69.44	214.33	572.33	358	1.08	0.03	34.94
LatP3.	Control	stim	ML	10	337.67	92.79	360.54	338.76	56.77	187.67	479	291.33	-0.35	-1.25	29.34
LatP3.	Alcohol	stim	ML	10	279.96	94.41	291.48	283.7	112.64	130	400	270	-0.18	-1.59	29.85
LatP3.	Control	prestim	PL	10	319.43	82.91	307.96	320.11	81.6	189.67	443.67	254	0.12	-1.37	26.22
LatP3.	Alcohol	prestim	PL	10	328.53	111.84	315	312.12	109.46	213.33	575	361.67	0.82	-0.33	35.37
LatP3.	Control	stim	PL	10	366.94	80.51	386.29	375.84	31.98	186.33	476.33	290	-0.92	0.04	25.46
LatP3.	Alcohol	stim	PL	10	313.18	96.23	339.77	322.35	92.02	130	423	293	-0.58	-1.16	30.43
AmplP1N1.	Control	prestim	PR	10	28.84	18.63	25.56	26.75	15.28	3.47	70.93	67.46	0.83	0.05	5.89
AmplP1N1.	Alcohol	prestim	PR	10	16.98	10.39	17.47	15.7	7.18	4.38	39.86	35.48	0.73	-0.19	3.28
AmplP1N1.	Control	stim	PR	10	70.77	23.1	67.14	68.12	13.27	43.01	119.76	76.75	0.94	-0.4	7.31
AmplP1N1.	Alcohol	stim	PR	10	44.72	41.24	42.83	37.14	42.5	7.08	143.04	135.96	1.17	0.45	13.04
AmplP1N1.	Control	prestim	MR	10	34.31	24.88	27.53	32.42	20.27	5.4	78.29	72.89	0.59	-1.24	7.87
AmplP1N1.	Alcohol	prestim	MR	10	19.21	15.27	13.92	16.97	11.38	5.29	51	45.71	0.86	-0.74	4.83
AmplP1N1.	Control	stim	MR	10	70.98	21.28	64.64	67.66	6.94	45.94	122.56	76.62	1.29	0.73	6.73
AmplP1N1.	Alcohol	stim	MR	10	34.54	24.9	30.65	32.16	28.94	8.02	80.08	72.07	0.38	-1.45	7.87
AmplP1N1.	Control	prestim	FR	10	34.17	24.32	29.39	32.75	22.22	2.65	77.06	74.41	0.4	-1.39	7.69
AmplP1N1.	Alcohol	prestim	FR	10	20.62	10.99	21.86	19.26	10.76	7.76	44.34	36.58	0.7	-0.4	3.48
AmplP1N1.	Control	stim	FR	10	65.3	17.01	67.68	67.17	4.72	24.89	90.71	65.82	-0.99	0.72	5.38
AmplP1N1.	Alcohol	stim	FR	10	30.05	15	27.45	30.01	15.9	8.42	51.96	43.54	0.16	-1.4	4.74
AmplP1N1.	Control	prestim	FC	10	34.15	23.66	27.75	32.41	24.61	4.55	77.62	73.07	0.43	-1.28	7.48
AmplP1N1.	Alcohol	prestim	FC	10	22.22	10.67	20.88	21.1	12.43	10.75	42.68	31.93	0.47	-1.19	3.37
AmplP1N1.	Control	stim	FC	10	67.62	21.2	66.03	67.16	5.88	25.71	113.19	87.48	0.23	0.67	6.7
AmplP1N1.	Alcohol	stim	FC	10	50.26	20.39	56.39	51.12	4.88	8.69	84.97	76.28	-0.48	-0.26	6.45
AmplP1N1.	Control	prestim	PC	10	32.98	18.56	28.81	33.17	13.15	3.23	61.24	58.01	0.2	-1.31	5.87
AmplP1N1.	Alcohol	prestim	PC	10	26.89	12.53	26.6	26.55	13.71	9.82	46.59	36.76	0.35	-1.34	3.96
AmplP1N1.	Control	stim	PC	10	67.74	25.53	60.13	63.84	9.28	45.89	120.83	74.95	1.18	-0.36	8.07
AmplP1N1.	Alcohol	stim	PC	10	30.71	20.76	29.09	28.21	20.2	7.47	73.98	66.52	0.64	-0.69	6.56
AmplP1N1.	Control	prestim	MC	10	28.39	21.39	19.82	25.99	17.34	3.31	72.61	69.3	0.73	-0.79	6.76
AmplP1N1.	Alcohol	prestim	MC	10	23.11	14.26	21.54	20.94	11.48	8.34	55.21	46.87	1.05	-0.07	4.51
AmplP1N1.	Control	stim	MC	10	65.83	20.65	56.55	62.23	7.14	47.58	112.93	65.36	1.2	0.02	6.53
AmplP1N1.	Alcohol	stim	MC	10	24.79	22.59	15.25	19.82	5.79	8.69	80.62	71.93	1.46	0.86	7.14
AmplP1N1.	Control	prestim	FL	10	32.9	19.91	33.24	30.95	23.03	8.88	72.45	63.57	0.54	-0.94	6.3
AmplP1N1.	Alcohol	prestim	FL	10	19.19	11.44	15.18	17.31	7.25	9.47	43.99	34.52	1.04	-0.39	3.62
AmplP1N1.	Control	stim	FL	10	78.09	25.37	71.66	75.81	13.83	45.17	129.2	84.03	0.76	-0.64	8.02
AmplP1N1.	Alcohol	stim	FL	10	29.68	23.07	15.8	27.2	9.51	8.77	70.38	61.62	0.6	-1.47	7.3
AmplP1N1.	Control	prestim	ML	10	30.3	24.99	21.53	27.84	13.14	4.04	76.2	72.15	0.87	-0.92	7.9
AmplP1N1.	Alcohol	prestim	ML	10	18.22	12.51	12.91	16.44	4.15	7.76	42.89	35.13	1.1	-0.59	3.96
AmplP1N1.	Control	stim	ML	10	74.67	33.8	63.35	68.61	12.66	36.35	161.54	125.19	1.53	1.55	10.69
AmplP1N1.	Alcohol	stim	ML	10	26.54	21.07	17.91	23.59	16.53	5.42	71.25	65.84	0.91	-0.57	6.66
AmplP1N1.	Control	prestim	PL	10	24.99	17.79	21.65	22.29	13.02	3.45	68.18	64.73	1.21	0.75	5.62
AmplP1N1.	Alcohol	prestim	PL	10	18.63	14.32	14.31	16.85	7.09	4.26	47.29	43.03	1	-0.6	4.53
AmplP1N1.	Control	stim	PL	10	58.16	26.8	48.34	52.65	6.24	31.86	128.54	96.69	1.68	1.87	8.48
AmplP1N1.	Alcohol	stim	PL	10	25.32	28.56	15.97	18.11	5.34	5.51	102.87	97.36	1.93	2.48	9.03
AmplN1P2.	Control	prestim	PR	10	18.55	18.98	10.7	13.65	3.25	7.36	68.91	61.55	1.82	2.02	6
AmplN1P2.	Alcohol	prestim	PR	10	12.46	6.87	14.29	12.38	2.03	0.88	24.67	23.79	-0.21	-0.72	2.17
AmplN1P2.	Control	stim	PR	10	31.17	16.81	24.96	29.54	7.47	10.89	64.57	53.68	0.76	-0.93	5.32
AmplN1P2.	Alcohol	stim	PR	10	19.75	21.68	11.79	17.04	15.99	0.92	60.34	59.42	0.88	-0.88	6.86
AmplN1P2.	Control	prestim	MR	10	19.76	23.02	13.05	13.78	6.66	3.8	83.52	79.72	2.06	2.93	7.28
AmplN1P2.	Alcohol	prestim	MR	10	10.75	5.43	12.63	11.28	3.75	1.01	16.24	15.23	-0.69	-1.23	1.72
AmplN1P2.	Control	stim	MR	10	32.21	16.82	31.52	32.94	15.89	2.7	55.91	53.21	-0.03	-1.23	5.32
AmplN1P2.	Alcohol	stim	MR	10	15.45	14.3	10.12	13.17	12.44	1.67	47.52	45.85	0.96	-0.21	4.52
AmplN1P2.	Control	prestim	FR	10	18.3	23.81	8.92	11.88	2.93	4.58	83.44	78.86	1.99	2.63	7.53
AmplN1P2.	Alcohol	prestim	FR	10	11.97	4.96	11.28	12.01	4.24	3.71	19.9	16.18	0.06	-1.13	1.57
AmplN1P2.	Control	stim	FR	10	33.91	17.33	30.44	31.44	10.42	15.71	71.8	56.09	0.97	-0.3	5.48
AmplN1P2.	Alcohol	stim	FR	10	13.25	4.09	13.69	13.66	1.61	4.58	18.67	14.1	-0.62	-0.34	1.29
AmplN1P2.	Control	prestim	FC	10	20.16	23.64	13	13.76	9.05	6.27	85.27	79.01	2.02	2.8	7.48
AmplN1P2.	Alcohol	prestim	FC	10	14.66	7.29	14.63	14.82	7.69	2.92	25.16	22.25	-0.17	-1.36	2.3
AmplN1P2.	Control	stim	FC	10	33.78	15.76	33.09	33.38	22.34	14.82	55.93	41.12	0.21	-1.71	4.98
AmplN1P2.	Alcohol	stim	FC	10	22.77	10.24	25.14	23.31	8.02	2.55	38.61	36.07	-0.44	-0.73	3.24
AmplN1P2.	Control	prestim	PC	10	18.61	14.4	13.23	15.67	3.66	8.03	52.79	44.77	1.41	0.47	4.55
AmplN1P2.	Alcohol	prestim	PC	10	16.64	8.05	15.69	16.65	9.15	4.52	28.66	24.14	0.05	-1.5	2.55
AmplN1P2.	Control	stim	PC	10	33.36	20.82	31.12	31.31	8.54	7.53	75.66	68.14	0.72	-0.59	6.58
AmplN1P2.	Alcohol	stim	PC	10	16.59	14.62	12.14	13.87	10.93	1.45	53.5	52.05	1.42	1.24	4.62
AmplN1P2.	Control	prestim	MC	10	17.99	21.54	12.46	12.44	5.99	3.1	77.24	74.14	2.01	2.76	6.81
AmplN1P2.	Alcohol	prestim	MC	10	16.91	11.34	16.16	15.65	8.99	3.23	40.71	37.47	0.78	-0.54	3.59
AmplN1P2.	Control	stim	MC	10	31.08	17.17	27.79	30.75	14.13	4.96	59.77	54.82	0.31	-1.28	5.43
AmplN1P2.	Alcohol	stim	MC	10	10.78	8.95	9.65	9.04	3.84	1.81	33.7	31.9	1.46	1.51	2.83
AmplN1P2.	Control	prestim	FL	10	19.71	21.49	12.88	14.68	8.19	2.63	77.08	74.45	1.81	2.15	6.79
AmplN1P2.	Alcohol	prestim	FL	10	13.56	7.38	12.36	12.77	4.36	4.04	29.36	25.32	0.83	-0.34	2.33
AmplN1P2.	Control	stim	FL	10	45.54	27.67	40.32	40.09	14.45	19.13	115.53	96.39	1.45	1.27	8.75
AmplN1P2.	Alcohol	stim	FL	10	12.37	8.46	11.44	11.86	10.07	1.8	26.99	25.19	0.27	-1.37	2.68
AmplN1P2.	Control	prestim	ML	10	16.5	21.33	9.78	10.38	1.77	5.28	76.67	71.39	2.2	3.35	6.75
AmplN1P2.	Alcohol	prestim	ML	10	13.75	8.33	12.48	13.07	10.41	3.55	29.4	25.85	0.37	-1.11	2.64
AmplN1P2.	Control	stim	ML	10	39.26	25.22	26.79	35.37	13.67	15.9	93.71	77.81	0.98	-0.47	7.98
AmplN1P2.	Alcohol	stim	ML	10	11.73	6.6	10.61	11.55	3.61	2.1	22.75	20.65	0.42	-1.02	2.09
AmplN1P2.	Control	prestim	PL	10	14.07	12.38	9	10.92	2.86	6.71	46.64	39.93	1.77	1.86	3.91
AmplN1P2.	Alcohol	prestim	PL	10	11.89	8.48	10.42	11.28	7.07	1.34	27.35	26.02	0.62	-1	2.68
AmplN1P2.	Control	stim	PL	10	31.54	18.61	25.64	27.29	6.01	15.96	81.08	65.11	1.8	2.1	5.88
AmplN1P2.	Alcohol	stim	PL	10	11.38	9.86	9.01	9.55	2.69	1.39	36.01	34.62	1.45	1.07	3.12
AmplP2N2.	Control	prestim	PR	10	4.79	4.17	2.98	4.4	2.13	0.9	11.82	10.92	0.69	-1.45	1.32
AmplP2N2.	Alcohol	prestim	PR	10	10.1	8.81	8.21	9.2	5.86	0.22	27.17	26.95	0.8	-0.84	2.79
AmplP2N2.	Control	stim	PR	10	6.74	3.95	7.11	6.84	4.25	0.44	12.23	11.79	-0.26	-1.4	1.25
AmplP2N2.	Alcohol	stim	PR	10	5.36	4.84	4.4	4.94	4.77	0.18	13.95	13.77	0.55	-1.4	1.53
AmplP2N2.	Control	prestim	MR	10	5.92	4.64	4.53	5.62	4.01	1.31	12.92	11.61	0.46	-1.66	1.47
AmplP2N2.	Alcohol	prestim	MR	10	9.79	9.5	7.3	8.13	4.43	0.22	32.61	32.39	1.31	0.57	3
AmplP2N2.	Control	stim	MR	10	6.82	6.46	5.08	5.74	5.7	0.38	21.96	21.58	1.1	0.26	2.04
AmplP2N2.	Alcohol	stim	MR	10	3.66	4.39	1.49	3.15	2.03	0.06	11.36	11.3	0.75	-1.24	1.39
AmplP2N2.	Control	prestim	FR	10	3.13	4.06	1.96	2.41	2.16	0.09	11.95	11.86	1.2	-0.22	1.28
AmplP2N2.	Alcohol	prestim	FR	10	10.04	7.2	8.26	9.37	4.83	0.38	25.11	24.73	0.75	-0.53	2.28
AmplP2N2.	Control	stim	FR	10	3.43	3.9	1.58	2.78	2.01	0.18	11.87	11.69	0.98	-0.5	1.23
AmplP2N2.	Alcohol	stim	FR	10	6.16	3.86	6.68	6.09	2.34	0.09	12.74	12.65	-0.22	-0.9	1.22
AmplP2N2.	Control	prestim	FC	10	3.24	4.4	1.31	2.47	0.8	0.34	12.27	11.93	1.26	-0.33	1.39
AmplP2N2.	Alcohol	prestim	FC	10	13.44	7.79	14.61	13.64	9.85	0.06	25.28	25.22	-0.1	-1.29	2.46
AmplP2N2.	Control	stim	FC	10	5.02	5.3	4.08	4.14	5.47	0.08	17.04	16.96	0.95	-0.1	1.67
AmplP2N2.	Alcohol	stim	FC	10	3.98	5.06	2.18	2.64	0.42	0.82	17.82	17	2	2.65	1.6
AmplP2N2.	Control	prestim	PC	10	4.3	4.91	2.6	3.37	3.37	0	16.03	16.03	1.23	0.45	1.55
AmplP2N2.	Alcohol	prestim	PC	10	11.96	6.76	11.02	11.48	5.04	1.31	26.48	25.17	0.59	-0.17	2.14
AmplP2N2.	Control	stim	PC	10	7.95	5.55	8.51	7.63	4.02	0.03	18.37	18.34	0.17	-0.87	1.75
AmplP2N2.	Alcohol	stim	PC	10	7.94	4.93	7.49	7.54	3.67	0.56	18.52	17.96	0.65	-0.23	1.56
AmplP2N2.	Control	prestim	MC	10	5.08	5.77	2.42	4.27	2.52	0.13	16.49	16.36	0.91	-0.89	1.83
AmplP2N2.	Alcohol	prestim	MC	10	11.13	6.41	9.83	9.81	3.42	5.06	27.75	22.69	1.59	1.66	2.03
AmplP2N2.	Control	stim	MC	10	6.64	5.93	5.41	5.52	5.28	1.26	20.97	19.71	1.26	0.6	1.88
AmplP2N2.	Alcohol	stim	MC	10	6.96	6.24	6.26	6.22	5.16	0.01	19.82	19.81	0.73	-0.69	1.97
AmplP2N2.	Control	prestim	FL	10	3.9	3.51	2.64	3.62	2.7	0.6	9.41	8.81	0.49	-1.64	1.11
AmplP2N2.	Alcohol	prestim	FL	10	10.96	8.07	9.96	9.98	6.07	0.06	29.74	29.68	0.99	0.34	2.55
AmplP2N2.	Control	stim	FL	10	6.79	5.41	5.55	6.16	6.04	0.67	17.94	17.27	0.62	-0.77	1.71
AmplP2N2.	Alcohol	stim	FL	10	6.06	6.66	4.68	4.96	5.67	0.01	20.85	20.84	0.97	-0.27	2.11
AmplP2N2.	Control	prestim	ML	10	3.99	2.94	3.04	3.67	1.85	0.99	9.53	8.54	0.88	-0.83	0.93
AmplP2N2.	Alcohol	prestim	ML	10	11.64	11.63	7.74	9.37	5.39	0.08	41.41	41.33	1.54	1.44	3.68
AmplP2N2.	Control	stim	ML	10	6.31	5.52	5.21	5.65	6.14	0.22	17.73	17.51	0.67	-0.75	1.75
AmplP2N2.	Alcohol	stim	ML	10	6.48	4.19	7.56	6.51	4.01	0.17	12.57	12.4	-0.22	-1.41	1.32
AmplP2N2.	Control	prestim	PL	10	4.32	4.21	2.87	3.49	3.37	0.44	14.83	14.39	1.39	1.04	1.33
AmplP2N2.	Alcohol	prestim	PL	10	7.86	6.34	6.33	7.4	4.79	0.32	19.01	18.69	0.66	-1.11	2
AmplP2N2.	Control	stim	PL	10	8.61	3.74	8.32	8.79	1.92	0.57	15.2	14.63	-0.4	0.17	1.18
AmplP2N2.	Alcohol	stim	PL	10	4.75	3.43	4.39	4.64	4.01	0.09	10.31	10.22	0.22	-1.35	1.08
AmplN2P3.	Control	prestim	PR	10	17.3	3.8	16.58	17.06	2.02	11.8	24.74	12.94	0.58	-0.7	1.2
AmplN2P3.	Alcohol	prestim	PR	10	14.89	11.87	14.13	13.05	11.57	2.37	42.12	39.75	1.03	0.07	3.75
AmplN2P3.	Control	stim	PR	10	35.34	10.35	34.57	33.51	5.53	23.94	61.41	37.47	1.38	1.24	3.27
AmplN2P3.	Alcohol	stim	PR	10	30.21	22.6	24.81	26.54	16.86	4.66	85.14	80.48	1.22	0.72	7.15
AmplN2P3.	Control	prestim	MR	10	21.63	11.01	19.81	19.69	9.68	11.03	47.71	36.69	1.13	0.4	3.48
AmplN2P3.	Alcohol	prestim	MR	10	20.72	23	14.45	15.63	11.26	2.14	80.05	77.9	1.61	1.53	7.27
AmplN2P3.	Control	stim	MR	10	37.88	13.46	32.56	36.33	4.58	25.37	62.76	37.39	1.04	-0.7	4.26
AmplN2P3.	Alcohol	stim	MR	10	25.39	13.7	22.99	24.09	8.72	6.77	54.38	47.61	0.69	-0.44	4.33
AmplN2P3.	Control	prestim	FR	10	19.8	10.88	16.05	18.46	7.05	8.49	41.88	33.4	0.81	-0.9	3.44
AmplN2P3.	Alcohol	prestim	FR	10	16.95	15	13.79	14.06	4.29	1.57	55.38	53.81	1.56	1.46	4.74
AmplN2P3.	Control	stim	FR	10	30.31	13.57	28.97	28.72	9.25	12.4	60.94	48.53	0.78	0.1	4.29
AmplN2P3.	Alcohol	stim	FR	10	28.98	9.29	26.66	28.09	4.38	16.87	48.25	31.38	0.8	-0.5	2.94
AmplN2P3.	Control	prestim	FC	10	22.14	11.32	19.35	21.26	8.82	8.86	42.48	33.62	0.67	-1.14	3.58
AmplN2P3.	Alcohol	prestim	FC	10	18.9	11.54	15.97	16.64	8.17	8.26	47.68	39.42	1.38	1.03	3.65
AmplN2P3.	Control	stim	FC	10	35.5	16.7	31.22	34.27	11.15	12.38	68.47	56.08	0.54	-0.71	5.28
AmplN2P3.	Alcohol	stim	FC	10	33.79	11.17	35.8	33.88	6.87	13.71	53.17	39.46	-0.21	-0.72	3.53
AmplN2P3.	Control	prestim	PC	10	21.53	8.04	20.35	20.57	7.07	10.82	39.92	29.1	0.92	0.14	2.54
AmplN2P3.	Alcohol	prestim	PC	10	22.09	14.03	19.42	20.18	10.67	7.87	51.62	43.75	0.9	-0.54	4.44
AmplN2P3.	Control	stim	PC	10	34.74	8.61	31.74	32.81	4.44	28.45	56.5	28.06	1.53	1.19	2.72
AmplN2P3.	Alcohol	stim	PC	10	27.93	7.03	30.71	28.57	4.24	15.63	35.05	19.41	-0.71	-1.26	2.22
AmplN2P3.	Control	prestim	MC	10	21.53	10.99	18.2	19.81	5.84	9.65	47.21	37.56	1.13	0.21	3.48
AmplN2P3.	Alcohol	prestim	MC	10	18.43	8.69	19.34	18.02	9.33	5.84	34.3	28.46	0.34	-1.04	2.75
AmplN2P3.	Control	stim	MC	10	36.31	13.16	31.83	34.52	3.16	25.34	61.66	36.33	1.2	-0.45	4.16
AmplN2P3.	Alcohol	stim	MC	10	25.33	15.87	22.91	23.25	11.49	6.67	60.69	54.02	0.91	-0.13	5.02
AmplN2P3.	Control	prestim	FL	10	21.97	9.82	19.95	21.75	9.31	8.39	37.33	28.94	0.31	-1.49	3.11
AmplN2P3.	Alcohol	prestim	FL	10	13.75	9.75	13.16	12.76	6.87	0.91	34.49	33.57	0.71	-0.42	3.08
AmplN2P3.	Control	stim	FL	10	35.83	15.76	31.17	34.76	7.15	14.17	66.04	51.87	0.72	-0.77	4.98
AmplN2P3.	Alcohol	stim	FL	10	25.13	15.2	18.44	23.61	5.37	6.75	55.65	48.9	0.76	-0.89	4.81
AmplN2P3.	Control	prestim	ML	10	21.29	14.57	15.59	18.42	5.41	8.7	56.82	48.11	1.36	0.68	4.61
AmplN2P3.	Alcohol	prestim	ML	10	17.18	9.96	14.83	16.32	11.59	3.1	38.21	35.11	0.57	-0.45	3.15
AmplN2P3.	Control	stim	ML	10	31.54	15.75	29.63	31.2	3.58	6.72	59.09	52.38	0.43	-0.8	4.98
AmplN2P3.	Alcohol	stim	ML	10	25.85	19.04	20.17	23.75	8.17	2.22	66.33	64.11	0.98	-0.33	6.02
AmplN2P3.	Control	prestim	PL	10	19.81	10.32	17.11	17.82	7.11	10.15	45.41	35.26	1.37	0.95	3.26
AmplN2P3.	Alcohol	prestim	PL	10	16.01	9.26	16.47	16.14	9.93	1.9	29.1	27.19	-0.07	-1.6	2.93
AmplN2P3.	Control	stim	PL	10	26.94	11.38	25.93	26.26	1.11	6.12	53.24	47.12	0.62	0.98	3.6
AmplN2P3.	Alcohol	stim	PL	10	21.63	18.07	17.61	18.2	4.45	1.08	69.57	68.49	1.7	2.13	5.71
dB_deltaPower.	Control	prestim	PR	10	21.75	3.64	20.83	21.56	2.72	15.64	29.36	13.72	0.46	-0.23	1.15
dB_deltaPower.	Alcohol	prestim	PR	10	19.25	5.78	20.94	19.63	5.6	8.91	26.61	17.71	-0.44	-1.24	1.83
dB_deltaPower.	Control	stim	PR	10	28.64	2.11	29.3	28.77	1.31	24.67	31.55	6.88	-0.54	-1.09	0.67
dB_deltaPower.	Alcohol	stim	PR	10	22.72	6.11	22.83	21.97	6.41	15.18	36.22	21.04	0.82	-0.21	1.93
dB_deltaPower.	Control	prestim	MR	10	23.08	4.67	22.39	23	3.68	15.87	30.96	15.08	0.36	-1.06	1.48
dB_deltaPower.	Alcohol	prestim	MR	10	20.25	6.83	20.32	20.04	6.9	9.9	32.23	22.33	0.29	-1.15	2.16
dB_deltaPower.	Control	stim	MR	10	29.29	1.82	28.77	29.18	0.95	26.71	32.79	6.08	0.6	-0.87	0.58
dB_deltaPower.	Alcohol	stim	MR	10	21.87	5.77	21.17	21.77	6.06	12.49	32.1	19.61	0.13	-1.15	1.83
dB_deltaPower.	Control	prestim	FR	10	22.45	5.82	21.82	22.27	8.22	15.4	30.93	15.53	0.2	-1.68	1.84
dB_deltaPower.	Alcohol	prestim	FR	10	20.09	4.69	18.48	19.82	2.06	13.49	28.83	15.34	0.65	-0.86	1.48
dB_deltaPower.	Control	stim	FR	10	29.27	4.02	29.55	29.93	1.57	19.37	33.92	14.55	-1.21	1	1.27
dB_deltaPower.	Alcohol	stim	FR	10	22.42	2.76	21.67	22.17	1.54	18.94	27.94	9	0.68	-0.73	0.87
dB_deltaPower.	Control	prestim	FC	10	23.94	4.98	23.84	24.02	5.65	16.19	31.06	14.87	-0.06	-1.37	1.57
dB_deltaPower.	Alcohol	prestim	FC	10	20.41	3.35	19.79	20.2	2.13	16.13	26.34	10.21	0.75	-0.86	1.06
dB_deltaPower.	Control	stim	FC	10	29.43	2.94	29.28	29.66	0.86	23.23	33.75	10.51	-0.32	-0.13	0.93
dB_deltaPower.	Alcohol	stim	FC	10	26.59	3.34	27.33	26.57	0.59	20.19	33.18	12.99	-0.03	-0.04	1.06
dB_deltaPower.	Control	prestim	PC	10	23.38	4.2	23.59	23.69	3.22	14.33	29.91	15.58	-0.56	-0.15	1.33
dB_deltaPower.	Alcohol	prestim	PC	10	21.29	4.5	20.45	21.08	4.82	15.93	28.4	12.47	0.44	-1.5	1.42
dB_deltaPower.	Control	stim	PC	10	28.37	2.49	28.44	28.39	1.06	23.83	32.77	8.95	-0.07	-0.64	0.79
dB_deltaPower.	Alcohol	stim	PC	10	22.69	3.84	23.49	23.06	2.07	13.88	28.53	14.64	-0.85	0.34	1.22
dB_deltaPower.	Control	prestim	MC	10	22.2	4.62	20.27	21.81	4.66	16.55	30.99	14.45	0.51	-1.21	1.46
dB_deltaPower.	Alcohol	prestim	MC	10	19.47	4	19.7	19.58	2.3	12.52	25.54	13.02	-0.08	-1.01	1.26
dB_deltaPower.	Control	stim	MC	10	28.34	2.28	27.21	28.06	0.48	26.35	32.55	6.2	1.03	-0.76	0.72
dB_deltaPower.	Alcohol	stim	MC	10	20.66	5.21	20.4	20.11	2.65	12.79	32.92	20.14	0.93	0.62	1.65
dB_deltaPower.	Control	prestim	FL	10	23.44	4.16	24.36	23.4	3.35	16.1	31.05	14.95	0	-0.78	1.31
dB_deltaPower.	Alcohol	prestim	FL	10	19.27	3.39	18.34	18.92	1.36	15.19	26.21	11.02	0.9	-0.53	1.07
dB_deltaPower.	Control	stim	FL	10	30.62	3.6	29.15	30.24	2.64	26.81	37.49	10.68	0.65	-1.17	1.14
dB_deltaPower.	Alcohol	stim	FL	10	21.9	5.7	20.18	21.81	3.56	12.71	31.75	19.04	0.36	-0.94	1.8
dB_deltaPower.	Control	prestim	ML	10	22.38	5.75	20.3	21.97	2.77	15.09	32.89	17.8	0.67	-1.08	1.82
dB_deltaPower.	Alcohol	prestim	ML	10	20.14	4.41	19.9	20.3	4.34	12.62	26.36	13.74	-0.01	-1.31	1.39
dB_deltaPower.	Control	stim	ML	10	29.01	3.35	27.3	28.94	1.51	24.65	33.9	9.25	0.48	-1.56	1.06
dB_deltaPower.	Alcohol	stim	ML	10	21.53	4.85	19.64	21.07	1.51	15.76	30.96	15.2	0.94	-0.65	1.53
dB_deltaPower.	Control	prestim	PL	10	21.15	4.56	20.12	20.68	3.93	15.45	30.66	15.21	0.73	-0.64	1.44
dB_deltaPower.	Alcohol	prestim	PL	10	18.94	5.78	19.09	18.87	5.53	10.09	28.37	18.29	0.2	-1.25	1.83
dB_deltaPower.	Control	stim	PL	10	25.72	2.55	25.84	26.07	0.55	19.31	29.34	10.03	-1.27	1.44	0.81
dB_deltaPower.	Alcohol	stim	PL	10	19.62	5.06	18.82	18.57	2.42	14.75	32.87	18.12	1.64	1.84	1.6
dB_thetaPower.	Control	prestim	PR	10	23.22	4.18	22.75	22.98	2.69	16.49	31.91	15.42	0.49	-0.34	1.32
dB_thetaPower.	Alcohol	prestim	PR	10	20.49	5.4	22.1	20.76	4.86	11.39	27.44	16.05	-0.4	-1.34	1.71
dB_thetaPower.	Control	stim	PR	10	30.63	1.88	31.07	30.51	0.51	27.99	34.23	6.25	0.1	-0.81	0.59
dB_thetaPower.	Alcohol	stim	PR	10	23.89	6.15	24.31	23.17	7.17	16.77	36.82	20.06	0.63	-0.62	1.94
dB_thetaPower.	Control	prestim	MR	10	23.99	5.08	22.7	23.76	4.59	16.46	33.37	16.91	0.4	-0.99	1.61
dB_thetaPower.	Alcohol	prestim	MR	10	21.33	6.44	21.28	21.05	6.38	12.23	32.65	20.41	0.37	-1.21	2.04
dB_thetaPower.	Control	stim	MR	10	31.12	1.51	30.92	31.15	0.68	28.38	33.61	5.23	0.2	-0.58	0.48
dB_thetaPower.	Alcohol	stim	MR	10	23.1	5.93	22.8	23.12	7.13	13.65	32.41	18.76	-0.02	-1.51	1.88
dB_thetaPower.	Control	prestim	FR	10	23.9	5.91	22.56	23.57	6.26	17.13	33.31	16.18	0.35	-1.63	1.87
dB_thetaPower.	Alcohol	prestim	FR	10	21.11	4.62	20.04	21.04	2.25	13.58	29.23	15.65	0.39	-0.84	1.46
dB_thetaPower.	Control	stim	FR	10	30.9	3.64	31.61	31.6	1.44	21.44	34.79	13.35	-1.55	1.75	1.15
dB_thetaPower.	Alcohol	stim	FR	10	23.98	2.71	23.29	23.82	2.03	20.38	28.82	8.43	0.61	-1.03	0.86
dB_thetaPower.	Control	prestim	FC	10	25.43	5.11	25.11	25.34	5.6	18.18	33.46	15.28	0.09	-1.4	1.62
dB_thetaPower.	Alcohol	prestim	FC	10	21.59	2.92	20.98	21.41	1.27	17.95	26.74	8.78	0.72	-0.85	0.92
dB_thetaPower.	Control	stim	FC	10	31.05	2.64	31.12	31.46	1	24.57	34.25	9.69	-1.15	0.99	0.84
dB_thetaPower.	Alcohol	stim	FC	10	28.01	3.3	28.3	28.02	1.04	21.51	34.43	12.92	-0.12	0.05	1.04
dB_thetaPower.	Control	prestim	PC	10	25.01	4.37	25.47	25.53	3.88	15.72	30.13	14.41	-0.69	-0.51	1.38
dB_thetaPower.	Alcohol	prestim	PC	10	22.36	4.01	21.2	22.13	3.42	17.71	28.84	11.13	0.49	-1.44	1.27
dB_thetaPower.	Control	stim	PC	10	30.17	2.25	30.18	29.93	1.1	27.05	35.22	8.16	0.73	0.1	0.71
dB_thetaPower.	Alcohol	stim	PC	10	23.8	4.02	24.97	24.16	1.5	15.03	29.74	14.71	-0.77	-0.16	1.27
dB_thetaPower.	Control	prestim	MC	10	23.27	4.73	21.24	22.73	4.19	17.84	33.07	15.23	0.7	-0.81	1.5
dB_thetaPower.	Alcohol	prestim	MC	10	19.89	3.93	20.04	19.93	1.97	13.57	25.88	12.31	0.08	-1.04	1.24
dB_thetaPower.	Control	stim	MC	10	30.44	1.75	29.65	30.17	0.74	29.1	33.97	4.87	1	-0.76	0.55
dB_thetaPower.	Alcohol	stim	MC	10	21.2	5.23	20.03	20.65	2.27	13.64	33.22	19.58	0.95	0.32	1.65
dB_thetaPower.	Control	prestim	FL	10	25.02	4.22	25.84	24.88	4.12	18.04	33.09	15.05	0.18	-0.78	1.33
dB_thetaPower.	Alcohol	prestim	FL	10	20.19	3.4	19.51	19.97	1.48	15.35	26.74	11.39	0.67	-0.69	1.07
dB_thetaPower.	Control	stim	FL	10	32.39	3.03	31.52	32.11	2.63	28.58	38.43	9.85	0.6	-0.92	0.96
dB_thetaPower.	Alcohol	stim	FL	10	23.11	5.79	21.36	23.14	4.52	13.77	32.27	18.5	0.25	-1.16	1.83
dB_thetaPower.	Control	prestim	ML	10	23.67	5.95	22.18	23.35	4.7	15.86	33.97	18.11	0.56	-1.1	1.88
dB_thetaPower.	Alcohol	prestim	ML	10	21.23	4.41	21.34	21.29	5.07	14.34	27.71	13.36	0.09	-1.44	1.39
dB_thetaPower.	Control	stim	ML	10	31.15	2.76	30.13	31.27	1.23	26.37	34.92	8.55	0.09	-1.22	0.87
dB_thetaPower.	Alcohol	stim	ML	10	22.8	4.84	21.67	22.51	2.18	16.11	31.81	15.7	0.73	-0.73	1.53
dB_thetaPower.	Control	prestim	PL	10	22.92	4.65	21.72	22.64	3.53	16.29	31.75	15.45	0.47	-1.02	1.47
dB_thetaPower.	Alcohol	prestim	PL	10	20.12	5.5	20.42	19.98	6.37	12.52	28.9	16.38	0.22	-1.44	1.74
dB_thetaPower.	Control	stim	PL	10	28.05	2.73	28.31	28.56	0.34	20.83	31.21	10.38	-1.65	2.08	0.86
dB_thetaPower.	Alcohol	stim	PL	10	20.95	4.98	20.36	19.97	1.28	15.83	33.93	18.1	1.58	1.8	1.57
dB_alphaPower.	Control	prestim	PR	10	23.39	4.42	22.87	23.14	3	16.18	32.53	16.35	0.43	-0.35	1.4
dB_alphaPower.	Alcohol	prestim	PR	10	20.11	5.1	21.03	20.24	4.83	11.95	27.22	15.27	-0.24	-1.34	1.61
dB_alphaPower.	Control	stim	PR	10	30.8	1.8	31.2	30.72	0.68	27.95	34.29	6.34	0.14	-0.73	0.57
dB_alphaPower.	Alcohol	stim	PR	10	23.83	6.11	24.32	23.13	7.33	16.83	36.46	19.63	0.58	-0.75	1.93
dB_alphaPower.	Control	prestim	MR	10	24.18	5.2	23.43	23.99	4.24	16.21	33.67	17.46	0.33	-0.99	1.65
dB_alphaPower.	Alcohol	prestim	MR	10	21.22	6.29	21.28	20.93	6.47	12.7	32.08	19.38	0.35	-1.29	1.99
dB_alphaPower.	Control	stim	MR	10	31.28	1.49	31.11	31.35	0.32	28.37	33.62	5.25	-0.04	-0.42	0.47
dB_alphaPower.	Alcohol	stim	MR	10	23.1	5.49	22.79	22.95	7.12	15.74	31.61	15.87	0.08	-1.75	1.74
dB_alphaPower.	Control	prestim	FR	10	24.04	5.94	22.93	23.7	6.66	17.22	33.58	16.36	0.32	-1.6	1.88
dB_alphaPower.	Alcohol	prestim	FR	10	20.91	4.59	19.9	20.89	2.91	13.36	28.6	15.24	0.29	-0.95	1.45
dB_alphaPower.	Control	stim	FR	10	31.08	3.66	31.69	31.83	0.99	21.42	34.78	13.36	-1.67	2.01	1.16
dB_alphaPower.	Alcohol	stim	FR	10	23.8	2.57	23.08	23.66	2.11	20.68	28.1	7.42	0.62	-1.17	0.81
dB_alphaPower.	Control	prestim	FC	10	25.37	5.2	25.17	25.24	5.85	18.06	33.71	15.65	0.12	-1.4	1.64
dB_alphaPower.	Alcohol	prestim	FC	10	21.48	2.81	20.84	21.4	1.39	17.14	26.45	9.31	0.55	-0.78	0.89
dB_alphaPower.	Control	stim	FC	10	31.13	2.63	31.31	31.58	0.75	24.44	34.23	9.78	-1.39	1.47	0.83
dB_alphaPower.	Alcohol	stim	FC	10	27.87	3.48	28.43	27.97	0.88	20.67	34.32	13.64	-0.33	0.11	1.1
dB_alphaPower.	Control	prestim	PC	10	24.99	4.48	25	25.57	3.69	15.35	30.04	14.69	-0.67	-0.41	1.42
dB_alphaPower.	Alcohol	prestim	PC	10	22.22	3.65	20.67	22.08	1.73	17.61	27.99	10.38	0.54	-1.45	1.15
dB_alphaPower.	Control	stim	PC	10	30.3	2.23	30.17	30.05	1.65	27.38	35.27	7.89	0.72	-0.03	0.71
dB_alphaPower.	Alcohol	stim	PC	10	23.58	4.1	24.78	23.97	1.17	14.39	29.62	15.23	-0.85	0.06	1.3
dB_alphaPower.	Control	prestim	MC	10	23.25	4.74	20.95	22.53	2.86	19	33.29	14.29	0.8	-0.73	1.5
dB_alphaPower.	Alcohol	prestim	MC	10	21.01	4.25	22.41	21.29	2.96	13.61	26.12	12.51	-0.53	-1.29	1.34
dB_alphaPower.	Control	stim	MC	10	30.45	1.78	29.54	30.18	0.65	29.1	33.97	4.88	0.95	-0.85	0.56
dB_alphaPower.	Alcohol	stim	MC	10	21.29	4.72	19.81	20.6	1.71	15.63	32.49	16.86	1.21	0.49	1.49
dB_alphaPower.	Control	prestim	FL	10	24.99	4.29	25.82	24.78	4.65	18.36	33.29	14.93	0.26	-0.87	1.36
dB_alphaPower.	Alcohol	prestim	FL	10	20.14	3.45	19.42	20	2.05	14.92	26.51	11.59	0.49	-0.84	1.09
dB_alphaPower.	Control	stim	FL	10	32.54	2.91	31.78	32.33	2.39	28.53	38.3	9.78	0.54	-0.87	0.92
dB_alphaPower.	Alcohol	stim	FL	10	22.99	5.57	21.01	22.89	4.85	15.05	31.67	16.63	0.39	-1.33	1.76
dB_alphaPower.	Control	prestim	ML	10	23.43	6.14	21.87	23.11	4.96	15.49	33.94	18.45	0.57	-1.13	1.94
dB_alphaPower.	Alcohol	prestim	ML	10	21.26	4.47	21.37	21.33	5.53	14.3	27.63	13.33	0.01	-1.55	1.41
dB_alphaPower.	Control	stim	ML	10	31.48	2.73	30.74	31.64	1.15	26.34	35.29	8.95	-0.1	-0.96	0.86
dB_alphaPower.	Alcohol	stim	ML	10	22.6	4.82	21.58	22.33	2.29	16.04	31.34	15.3	0.72	-0.78	1.52
dB_alphaPower.	Control	prestim	PL	10	22.83	4.77	21.59	22.59	3.15	15.76	31.8	16.04	0.44	-1	1.51
dB_alphaPower.	Alcohol	prestim	PL	10	20.01	5.36	20.13	19.77	5.98	13.16	28.81	15.64	0.28	-1.42	1.7
dB_alphaPower.	Control	stim	PL	10	28.51	2.67	28.63	28.89	0.36	21.73	32.22	10.5	-1.32	1.53	0.85
dB_alphaPower.	Alcohol	stim	PL	10	20.79	4.88	19.83	19.72	1.03	16.19	33.93	17.74	1.83	2.34	1.54
dB_betaPower.	Control	prestim	PR	10	21.71	5.66	21.51	21.64	3.94	11.6	32.43	20.83	0.01	-0.51	1.79
dB_betaPower.	Alcohol	prestim	PR	10	18.31	4.09	18.53	18.17	2	11.92	25.8	13.88	0.06	-0.82	1.29
dB_betaPower.	Control	stim	PR	10	30	2.03	30.43	30.08	1.92	25.98	33.41	7.43	-0.3	-0.54	0.64
dB_betaPower.	Alcohol	stim	PR	10	22.32	6.74	23.85	21.73	7.57	14.29	35.11	20.82	0.3	-1.15	2.13
dB_betaPower.	Control	prestim	MR	10	22.93	6.24	23.02	22.86	6.11	12.92	33.48	20.56	0.08	-1.15	1.97
dB_betaPower.	Alcohol	prestim	MR	10	19.5	5.88	19.17	19.34	5.73	11.64	28.64	17	0.24	-1.4	1.86
dB_betaPower.	Control	stim	MR	10	30.26	1.76	30.18	30.39	1.02	26.54	32.96	6.42	-0.48	-0.26	0.56
dB_betaPower.	Alcohol	stim	MR	10	21.54	6.1	21.68	21.43	7.84	13.58	30.34	16.77	0.04	-1.9	1.93
dB_betaPower.	Control	prestim	FR	10	22.85	6.32	22.26	22.76	6.58	13.08	33.37	20.29	0.16	-1.32	2
dB_betaPower.	Alcohol	prestim	FR	10	19.92	4.52	20.47	20.07	3.72	12.37	26.28	13.91	-0.31	-1.19	1.43
dB_betaPower.	Control	stim	FR	10	29.62	4.06	30.84	30.6	0.83	18.57	32.82	14.25	-1.93	2.54	1.28
dB_betaPower.	Alcohol	stim	FR	10	21.66	2.59	21.07	21.48	2.18	18.13	26.61	8.48	0.47	-0.98	0.82
dB_betaPower.	Control	prestim	FC	10	23.36	6.16	23.4	23.45	7.38	12.51	33.48	20.97	-0.05	-1.08	1.95
dB_betaPower.	Alcohol	prestim	FC	10	20.55	3.35	21.29	20.76	3.11	14.27	25.17	10.9	-0.42	-1.08	1.06
dB_betaPower.	Control	stim	FC	10	29.98	3.18	30.57	30.66	0.81	21.48	33.01	11.53	-1.79	2.24	1
dB_betaPower.	Alcohol	stim	FC	10	25.95	3.89	26.84	26.05	0.8	18.41	32.66	14.25	-0.42	-0.4	1.23
dB_betaPower.	Control	prestim	PC	10	23.29	5.21	22.84	23.93	1.82	11.43	30.04	18.6	-0.78	0.15	1.65
dB_betaPower.	Alcohol	prestim	PC	10	21.35	3.04	21.56	21.43	3.99	16.89	25.13	8.24	-0.25	-1.58	0.96
dB_betaPower.	Control	stim	PC	10	29.16	2.34	28.57	28.85	1.45	26.54	34.26	7.72	1.01	-0.28	0.74
dB_betaPower.	Alcohol	stim	PC	10	21.52	4.82	22.26	22.07	2.3	10.23	28.32	18.09	-1	0.47	1.52
dB_betaPower.	Control	prestim	MC	10	21.56	5.42	19.61	20.97	3.73	14.83	32.96	18.13	0.76	-0.62	1.71
dB_betaPower.	Alcohol	prestim	MC	10	20.7	3.85	22.17	20.98	0.77	13.14	26.03	12.89	-0.67	-0.84	1.22
dB_betaPower.	Control	stim	MC	10	29.54	1.88	28.99	29.56	1.48	26.57	32.41	5.84	0.25	-1.21	0.59
dB_betaPower.	Alcohol	stim	MC	10	19.68	4.61	17.91	19.12	0.99	14.1	29.76	15.66	0.99	-0.28	1.46
dB_betaPower.	Control	prestim	FL	10	23.39	4.82	23.92	22.91	4.64	17.63	32.93	15.3	0.41	-0.92	1.52
dB_betaPower.	Alcohol	prestim	FL	10	19.72	3.53	20.81	19.77	2.33	13.65	25.4	11.75	-0.26	-1.15	1.12
dB_betaPower.	Control	stim	FL	10	31.4	2.65	31.08	31.46	1.65	26.3	36.03	9.73	-0.07	-0.52	0.84
dB_betaPower.	Alcohol	stim	FL	10	20.67	5.8	17.2	20.32	2.9	13.87	30.24	16.37	0.48	-1.58	1.83
dB_betaPower.	Control	prestim	ML	10	21.7	6.76	19.93	21.57	4.24	11.66	32.82	21.16	0.46	-1.1	2.14
dB_betaPower.	Alcohol	prestim	ML	10	20.22	4.35	21.08	20.32	5.66	14.21	25.43	11.23	-0.18	-1.79	1.37
dB_betaPower.	Control	stim	ML	10	30.64	2.87	30.45	30.84	1.19	24.38	35.27	10.89	-0.52	0.03	0.91
dB_betaPower.	Alcohol	stim	ML	10	20.54	4.78	18.94	20.3	3.55	13.66	29.36	15.7	0.47	-1.06	1.51
dB_betaPower.	Control	prestim	PL	10	21.2	5.34	20.16	21.18	2.57	11.62	30.93	19.3	0.17	-0.65	1.69
dB_betaPower.	Alcohol	prestim	PL	10	18.37	5.16	17.79	18.06	4.88	11.82	27.37	15.55	0.5	-1.13	1.63
dB_betaPower.	Control	stim	PL	10	28.05	2.76	28.09	28.23	1.15	22	32.65	10.65	-0.58	0.16	0.87
dB_betaPower.	Alcohol	stim	PL	10	19.29	5.14	17.48	18.07	2.06	15.67	32.68	17	1.7	1.7	1.62
dB_gammaPower.	Control	prestim	PR	10	10.64	4.86	10.08	10.4	5.45	4.14	19.07	14.93	0.29	-1.42	1.54
dB_gammaPower.	Alcohol	prestim	PR	10	12.37	4.76	13.68	12.85	5.11	3.33	17.54	14.21	-0.55	-1.17	1.51
dB_gammaPower.	Control	stim	PR	10	18.34	4.27	16.78	17.49	1.74	14.6	28.83	14.24	1.38	0.82	1.35
dB_gammaPower.	Alcohol	stim	PR	10	15.63	8.22	17.04	15.39	8	4.41	28.71	24.3	-0.02	-1.42	2.6
dB_gammaPower.	Control	prestim	MR	10	13.29	5.29	15.18	13.75	3.69	3.93	18.99	15.06	-0.56	-1.43	1.67
dB_gammaPower.	Alcohol	prestim	MR	10	12.26	4.37	11.98	11.98	5.78	6.69	20.12	13.43	0.34	-1.28	1.38
dB_gammaPower.	Control	stim	MR	10	17.23	4.01	16.14	16.23	1.57	14.32	28.16	13.84	1.94	2.59	1.27
dB_gammaPower.	Alcohol	stim	MR	10	14.53	7.04	15.53	14.56	8.62	4.33	24.53	20.2	-0.03	-1.58	2.23
dB_gammaPower.	Control	prestim	FR	10	10.54	5.54	9.42	10.55	6.89	2.58	18.35	15.76	0.08	-1.57	1.75
dB_gammaPower.	Alcohol	prestim	FR	10	13.88	4.26	14.34	14	6.04	7.91	18.89	10.99	-0.19	-1.72	1.35
dB_gammaPower.	Control	stim	FR	10	14.08	1.78	14.39	14.17	1.8	10.91	16.46	5.55	-0.32	-1.26	0.56
dB_gammaPower.	Alcohol	stim	FR	10	14.13	5.52	12.91	14.04	5.02	6.46	22.57	16.11	0.36	-1.34	1.74
dB_gammaPower.	Control	prestim	FC	10	11.49	4.73	11.25	11.92	2.57	1.35	18.2	16.85	-0.45	-0.13	1.5
dB_gammaPower.	Alcohol	prestim	FC	10	15.69	3.66	15.77	16.03	3.31	7.87	20.8	12.93	-0.63	-0.43	1.16
dB_gammaPower.	Control	stim	FC	10	14.79	5.93	14.6	14.64	4.19	4.15	26.59	22.43	0.21	-0.3	1.87
dB_gammaPower.	Alcohol	stim	FC	10	18.67	4.86	20.56	19.59	1.91	6.64	23.29	16.65	-1.41	0.91	1.54
dB_gammaPower.	Control	prestim	PC	10	10.87	4.96	11.69	11.23	3.99	0.35	18.46	18.12	-0.58	-0.32	1.57
dB_gammaPower.	Alcohol	prestim	PC	10	16.7	3.72	16.97	17.04	2.51	9.21	21.46	12.25	-0.65	-0.7	1.18
dB_gammaPower.	Control	stim	PC	10	18.46	4.4	16.96	17.55	2.28	14.9	29.3	14.4	1.41	0.83	1.39
dB_gammaPower.	Alcohol	stim	PC	10	14.94	6.46	15.5	14.79	7.21	6.06	25	18.94	0.02	-1.49	2.04
dB_gammaPower.	Control	prestim	MC	10	11.18	4.83	11.27	11.23	6.22	4.04	17.93	13.89	-0.18	-1.49	1.53
dB_gammaPower.	Alcohol	prestim	MC	10	14.98	4.48	15.37	15.17	1.05	6.76	21.7	14.94	-0.5	-0.77	1.42
dB_gammaPower.	Control	stim	MC	10	16.36	4.13	15.21	15.57	1.06	11.9	27.14	15.24	1.64	1.8	1.31
dB_gammaPower.	Alcohol	stim	MC	10	13.84	5.57	13.38	13.52	4.23	5.15	25.08	19.92	0.38	-0.55	1.76
dB_gammaPower.	Control	prestim	FL	10	11.07	3.34	11.22	10.96	3.36	6.21	16.82	10.6	0.2	-1.26	1.05
dB_gammaPower.	Alcohol	prestim	FL	10	15.23	3.85	16.09	15.65	3.55	8.14	18.94	10.8	-0.78	-0.98	1.22
dB_gammaPower.	Control	stim	FL	10	16.13	4.59	14.4	15.3	1.36	11.24	27.71	16.47	1.49	1.24	1.45
dB_gammaPower.	Alcohol	stim	FL	10	14.18	5.92	13.97	14.04	6.2	5.65	23.78	18.12	0.11	-1.46	1.87
dB_gammaPower.	Control	prestim	ML	10	9.63	3.78	10.11	9.89	3.56	2.13	15.1	12.96	-0.49	-0.81	1.19
dB_gammaPower.	Alcohol	prestim	ML	10	14.68	3.67	15.99	15.14	2.65	7.75	17.92	10.18	-0.79	-1.05	1.16
dB_gammaPower.	Control	stim	ML	10	16.75	5.14	15.13	15.38	0.8	13.47	31.01	17.54	2.08	2.96	1.63
dB_gammaPower.	Alcohol	stim	ML	10	13.9	6.51	10.9	13.78	6.5	5.95	22.83	16.88	0.27	-1.81	2.06
dB_gammaPower.	Control	prestim	PL	10	9.24	4.39	9.66	9.45	3.87	1.24	15.65	14.41	-0.22	-1.09	1.39
dB_gammaPower.	Alcohol	prestim	PL	10	13.28	3.69	15.01	13.46	2.59	8.12	16.95	8.83	-0.41	-1.82	1.17
dB_gammaPower.	Control	stim	PL	10	17.73	4.81	16.22	16.69	1.46	13.71	30.05	16.34	1.59	1.44	1.52
dB_gammaPower.	Alcohol	stim	PL	10	12.72	6.12	10.8	12.08	5.09	5.87	24.7	18.83	0.71	-0.93	1.94
Time_deltaPower.	Control	prestim	PR	10	159.61	173.58	106.75	122.72	25.71	-0.29	614.63	614.92	1.72	1.83	54.89
Time_deltaPower.	Alcohol	prestim	PR	10	228.32	156.6	184.5	209.02	91.79	95.75	515.26	419.51	1	-0.73	49.52
Time_deltaPower.	Control	stim	PR	10	90.82	13.49	93.59	92.55	3.46	61.07	106.75	45.69	-1.04	-0.12	4.26
Time_deltaPower.	Alcohol	stim	PR	10	105.75	94.59	92.88	90.12	11.62	-14.63	351.19	365.82	1.51	1.82	29.91
Time_deltaPower.	Control	prestim	MR	10	80.01	55.95	81.58	81.37	49.19	-12.96	162.11	175.07	-0.43	-1.08	17.69
Time_deltaPower.	Alcohol	prestim	MR	10	126.73	66.33	113.09	121.63	58.34	51.73	242.48	190.75	0.66	-1.1	20.97
Time_deltaPower.	Control	stim	MR	10	102.07	14.64	103.64	103.07	5.93	70.4	125.76	55.36	-0.64	-0.01	4.63
Time_deltaPower.	Alcohol	stim	MR	10	121.96	93.06	98.98	109.8	9.39	-14.63	355.86	370.49	1.27	1.46	29.43
Time_deltaPower.	Control	prestim	FR	10	84.62	49.97	100.65	91.1	16.32	-8.3	125.76	134.06	-1.15	-0.52	15.8
Time_deltaPower.	Alcohol	prestim	FR	10	164.38	125.85	139.1	143.48	51.67	13.71	482.24	468.53	1.41	1.31	39.8
Time_deltaPower.	Control	stim	FR	10	164.96	158.22	115.81	116.61	10.96	102.08	614.63	512.55	2.26	3.53	50.03
Time_deltaPower.	Alcohol	stim	FR	10	146.26	67.48	129.79	131.29	13.9	87.74	324.51	236.77	1.75	1.96	21.34
Time_deltaPower.	Control	prestim	FC	10	137.1	130.22	116.42	115.09	40.05	-8.3	458.57	466.86	1.35	0.96	41.18
Time_deltaPower.	Alcohol	prestim	FC	10	207.55	128.66	175.39	186.02	92.45	84.74	502.58	417.84	1.1	0.05	40.69
Time_deltaPower.	Control	stim	FC	10	106.7	8.95	106.15	106.48	4.7	89.41	125.76	36.35	0.24	0.46	2.83
Time_deltaPower.	Alcohol	stim	FC	10	121.37	33.84	105.23	116.53	3.92	95.75	185.79	90.04	1.22	-0.44	10.7
Time_deltaPower.	Control	prestim	PC	10	91.7	77.05	87.75	82.02	25.71	-11.63	272.49	284.12	0.88	0.56	24.37
Time_deltaPower.	Alcohol	prestim	PC	10	156.48	88.47	138.46	152.15	45.78	12.05	335.51	323.47	0.45	-0.5	27.98
Time_deltaPower.	Control	stim	PC	10	94.5	19.09	96.31	94.56	4.7	58.07	130.43	72.36	-0.17	-0.22	6.04
Time_deltaPower.	Alcohol	stim	PC	10	164.01	70.35	161.97	153.11	63.07	87.74	327.51	239.77	1.02	0.22	22.25
Time_deltaPower.	Control	prestim	MC	10	204.95	195.71	118.59	180.39	59.71	-8.3	614.63	622.93	0.95	-0.6	61.89
Time_deltaPower.	Alcohol	prestim	MC	10	159.48	87.46	137.95	140.31	24.01	87.74	384.54	296.79	1.63	1.5	27.66
Time_deltaPower.	Control	stim	MC	10	90.97	13.74	89.04	92.36	15.08	64.07	106.75	42.68	-0.42	-1.02	4.34
Time_deltaPower.	Alcohol	stim	MC	10	137.25	85.02	133.1	132.82	40.79	-14.63	324.51	339.14	0.49	0.4	26.89
Time_deltaPower.	Control	prestim	FL	10	120.86	129.28	117.09	94.79	29.17	-8.3	458.57	466.86	1.58	1.85	40.88
Time_deltaPower.	Alcohol	prestim	FL	10	179.1	134.66	155.61	154.17	86.27	34.39	523.26	488.87	1.49	1.44	42.58
Time_deltaPower.	Control	stim	FL	10	106.37	7.44	104.12	104.68	3.01	100.42	125.76	25.34	1.67	1.69	2.35
Time_deltaPower.	Alcohol	stim	FL	10	134.79	94.93	115.42	125.05	31.36	-14.63	362.19	376.82	0.98	0.92	30.02
Time_deltaPower.	Control	prestim	ML	10	172.7	151.19	116.26	159.43	56.12	-11.63	463.23	474.86	0.76	-0.97	47.81
Time_deltaPower.	Alcohol	prestim	ML	10	183.84	129.39	151.54	152.84	78.02	91.08	524.59	433.51	1.72	1.89	40.92
Time_deltaPower.	Control	stim	ML	10	92.82	17.8	91.97	92.46	15.68	61.07	127.43	66.36	0.16	-0.49	5.63
Time_deltaPower.	Alcohol	stim	ML	10	131.2	94.1	115.42	120.92	25.58	-14.63	359.19	373.82	1.05	1.04	29.76
Time_deltaPower.	Control	prestim	PL	10	128.18	139.98	94.25	104.77	45.49	-11.63	455.23	466.86	1.18	0.31	44.26
Time_deltaPower.	Alcohol	prestim	PL	10	197.07	109.19	187.95	181.59	120.39	92.75	425.22	332.47	0.74	-0.71	34.53
Time_deltaPower.	Control	stim	PL	10	75.35	28.74	74.18	75.58	21.35	24.72	124.09	99.37	-0.2	-0.83	9.09
Time_deltaPower.	Alcohol	stim	PL	10	169.35	67.91	159.61	158.94	41.04	95.75	326.18	230.43	1.1	0.17	21.47
Freq_deltaPower.	Control	prestim	PR	10	3.89	0.14	3.94	3.94	0	3.48	3.94	0.46	-2.28	3.57	0.05
Freq_deltaPower.	Alcohol	prestim	PR	10	3.94	0	3.94	3.94	0	3.94	3.94	0	1.91	1.05	0
Freq_deltaPower.	Control	stim	PR	10	3.94	0	3.94	3.94	0	3.94	3.94	0	-0.34	-2.19	0
Freq_deltaPower.	Alcohol	stim	PR	10	3.94	0	3.94	3.94	0	3.94	3.94	0	1.91	1.05	0
Freq_deltaPower.	Control	prestim	MR	10	3.56	0.93	3.94	3.83	0	1.01	3.94	2.93	-2	2.62	0.3
Freq_deltaPower.	Alcohol	prestim	MR	10	3.94	0	3.94	3.94	0	3.94	3.94	0	2.7	5.1	0
Freq_deltaPower.	Control	stim	MR	10	3.59	0.91	3.94	3.87	0	1.01	3.94	2.93	-2.24	3.45	0.29
Freq_deltaPower.	Alcohol	stim	MR	10	3.94	0	3.94	3.94	0	3.94	3.94	0	1.91	1.05	0
Freq_deltaPower.	Control	prestim	FR	10	3.64	0.92	3.94	3.93	0	1.01	3.94	2.93	-2.28	3.56	0.29
Freq_deltaPower.	Alcohol	prestim	FR	10	3.94	0	3.94	3.94	0	3.94	3.94	0	2.7	5.1	0
Freq_deltaPower.	Control	stim	FR	10	3.61	0.92	3.94	3.89	0	1.01	3.94	2.93	-2.26	3.52	0.29
Freq_deltaPower.	Alcohol	stim	FR	10	3.94	0	3.94	3.94	0	3.94	3.94	0	-0.17	-2.19	0
Freq_deltaPower.	Control	prestim	FC	10	3.64	0.93	3.94	3.94	0	1.01	3.94	2.93	-2.28	3.57	0.29
Freq_deltaPower.	Alcohol	prestim	FC	10	3.94	0	3.94	3.94	0	3.94	3.94	0	2.7	5.1	0
Freq_deltaPower.	Control	stim	FC	10	3.63	0.92	3.94	3.91	0	1.01	3.94	2.93	-2.27	3.55	0.29
Freq_deltaPower.	Alcohol	stim	FC	10	3.94	0	3.94	3.94	0	3.94	3.94	0	-0.17	-2.19	0
Freq_deltaPower.	Control	prestim	PC	10	3.63	0.92	3.94	3.92	0	1.01	3.94	2.93	-2.27	3.56	0.29
Freq_deltaPower.	Alcohol	prestim	PC	10	3.94	0	3.94	3.94	0	3.94	3.94	0	2.7	5.1	0
Freq_deltaPower.	Control	stim	PC	10	3.62	0.92	3.94	3.91	0	1.01	3.94	2.93	-2.27	3.55	0.29
Freq_deltaPower.	Alcohol	stim	PC	10	3.94	0	3.94	3.94	0	3.94	3.94	0	1.91	1.05	0
Freq_deltaPower.	Control	prestim	MC	10	3.64	0.93	3.94	3.94	0	1.01	3.94	2.93	-2.28	3.57	0.29
Freq_deltaPower.	Alcohol	prestim	MC	10	3.45	0.91	3.78	3.69	0.23	1.01	3.94	2.93	-1.85	2.16	0.29
Freq_deltaPower.	Control	stim	MC	10	3.94	0	3.94	3.94	0	3.94	3.94	0	-0.34	-2.19	0
Freq_deltaPower.	Alcohol	stim	MC	10	3.9	0.11	3.94	3.93	0	3.57	3.94	0.37	-2.25	3.49	0.04
Freq_deltaPower.	Control	prestim	FL	10	3.64	0.93	3.94	3.94	0	1.01	3.94	2.93	-2.28	3.57	0.29
Freq_deltaPower.	Alcohol	prestim	FL	10	3.94	0	3.94	3.94	0	3.94	3.94	0	2.7	5.1	0
Freq_deltaPower.	Control	stim	FL	10	3.59	0.91	3.94	3.87	0	1.01	3.94	2.93	-2.22	3.39	0.29
Freq_deltaPower.	Alcohol	stim	FL	10	3.94	0	3.94	3.94	0	3.94	3.94	0	2.7	5.1	0
Freq_deltaPower.	Control	prestim	ML	10	3.64	0.93	3.94	3.94	0	1.01	3.94	2.93	-2.28	3.57	0.29
Freq_deltaPower.	Alcohol	prestim	ML	10	3.94	0	3.94	3.94	0	3.94	3.94	0	2.7	5.1	0
Freq_deltaPower.	Control	stim	ML	10	3.6	0.91	3.94	3.88	0	1.01	3.94	2.93	-2.25	3.5	0.29
Freq_deltaPower.	Alcohol	stim	ML	10	3.67	0.75	3.94	3.9	0	1.56	3.94	2.38	-2.22	3.4	0.24
Freq_deltaPower.	Control	prestim	PL	10	3.34	1.23	3.94	3.56	0	1.01	3.94	2.93	-1.28	-0.37	0.39
Freq_deltaPower.	Alcohol	prestim	PL	10	3.94	0	3.94	3.94	0	3.94	3.94	0	2.7	5.1	0
Freq_deltaPower.	Control	stim	PL	10	3.88	0.14	3.93	3.92	0.01	3.48	3.94	0.46	-2.22	3.39	0.04
Freq_deltaPower.	Alcohol	stim	PL	10	3.64	0.92	3.94	3.93	0	1.01	3.94	2.93	-2.28	3.57	0.29
Time_thetaPower.	Control	prestim	PR	10	127.38	122.67	87.74	96.28	26.95	35.72	467.9	432.18	2.07	2.98	38.79
Time_thetaPower.	Alcohol	prestim	PR	10	216.57	164.93	176.28	197.88	87.76	65.74	516.92	451.19	0.96	-0.74	52.16
Time_thetaPower.	Control	stim	PR	10	74.29	4.98	76.18	75.06	3.31	64.07	78.41	14.34	-0.94	-0.7	1.58
Time_thetaPower.	Alcohol	stim	PR	10	104.87	86.96	91.49	92.35	20.02	-14.63	324.51	339.14	1.33	1.45	27.5
Time_thetaPower.	Control	prestim	MR	10	88.65	26.39	96.58	90.41	35.1	37.39	125.76	88.37	-0.39	-0.96	8.34
Time_thetaPower.	Alcohol	prestim	MR	10	116.93	68.77	110.95	109.01	59.87	37.39	259.82	222.43	0.82	-0.59	21.75
Time_thetaPower.	Control	stim	MR	10	74.64	5.25	75.41	75.07	0.53	62.73	83.08	20.34	-0.76	0.38	1.66
Time_thetaPower.	Alcohol	stim	MR	10	140.62	84.02	110.09	119.91	30.27	78.41	368.53	290.12	1.91	2.47	26.57
Time_thetaPower.	Control	prestim	FR	10	74.56	16.76	75.53	76.36	11.18	37.39	97.42	60.03	-0.9	-0.06	5.3
Time_thetaPower.	Alcohol	prestim	FR	10	139.98	73.61	124.26	138.62	55.13	32.72	258.15	225.43	0.36	-1.23	23.28
Time_thetaPower.	Control	stim	FR	10	112.53	90.35	86.75	85.79	12.37	70.4	368.53	298.12	2.24	3.46	28.57
Time_thetaPower.	Alcohol	stim	FR	10	142.63	68.75	126.92	128.72	15.33	76.74	319.84	243.1	1.6	1.55	21.74
Time_thetaPower.	Control	prestim	FC	10	136.73	129.6	92.58	107.54	27.93	34.39	472.57	438.18	1.69	1.61	40.98
Time_thetaPower.	Alcohol	prestim	FC	10	170.77	63.73	174.09	170.61	86.73	83.08	259.82	176.74	0.04	-1.75	20.15
Time_thetaPower.	Control	stim	FC	10	84.73	11.18	81.49	84.14	6.8	69.07	105.09	36.02	0.51	-1.13	3.54
Time_thetaPower.	Alcohol	stim	FC	10	115.03	36.61	101.53	110.22	7.74	81.41	187.12	105.71	1.11	-0.51	11.58
Time_thetaPower.	Control	prestim	PC	10	84	28.33	83.97	83.4	12.2	39.06	133.76	94.71	0.23	-0.9	8.96
Time_thetaPower.	Alcohol	prestim	PC	10	169.68	76.88	154.94	157.24	56.12	83.08	355.86	272.78	1.22	0.68	24.31
Time_thetaPower.	Control	stim	PC	10	70.85	5.79	69.04	70.71	2.43	62.73	80.08	17.34	0.51	-1.24	1.83
Time_thetaPower.	Alcohol	stim	PC	10	168.51	70.46	168.6	159.48	70.68	84.74	324.51	239.77	0.85	-0.21	22.28
Time_thetaPower.	Control	prestim	MC	10	141.23	138.36	86.58	112.59	36.34	42.06	469.57	427.51	1.41	0.46	43.75
Time_thetaPower.	Alcohol	prestim	MC	10	113.23	59.49	99.84	106.34	29.55	31.05	250.48	219.42	0.97	0.26	18.81
Time_thetaPower.	Control	stim	MC	10	75.37	5.96	75.07	75.62	1.98	64.07	84.74	20.68	0.07	-0.48	1.89
Time_thetaPower.	Alcohol	stim	MC	10	123.22	83.64	120.09	115.7	35.35	-14.63	321.18	335.81	0.85	0.89	26.45
Time_thetaPower.	Control	prestim	FL	10	119.39	123.93	83.91	86.08	16.56	39.06	466.24	427.18	2.14	3.16	39.19
Time_thetaPower.	Alcohol	prestim	FL	10	127.6	61	115.59	123.35	17.55	31.05	258.15	227.09	0.7	-0.1	19.29
Time_thetaPower.	Control	stim	FL	10	81.31	13.46	79.32	79.07	4.45	65.74	114.76	49.02	1.32	1.08	4.26
Time_thetaPower.	Alcohol	stim	FL	10	151.16	82.39	132.2	133.04	27.09	75.41	371.86	296.46	1.81	2.24	26.05
Time_thetaPower.	Control	prestim	ML	10	205.27	202.04	122.29	184.17	69.75	-11.63	590.95	602.58	0.79	-1.11	63.89
Time_thetaPower.	Alcohol	prestim	ML	10	179.54	132.58	129.71	148.05	43.19	84.74	526.26	441.52	1.71	1.75	41.93
Time_thetaPower.	Control	stim	ML	10	73.66	6.55	72.54	73.48	1.46	64.07	84.74	20.68	0.56	-0.82	2.07
Time_thetaPower.	Alcohol	stim	ML	10	156.19	82.01	152.16	150.96	54.88	28.05	326.18	298.12	0.49	-0.41	25.93
Time_thetaPower.	Control	prestim	PL	10	135.64	130.99	95.47	105.98	42.02	39.06	469.57	430.51	1.6	1.34	41.42
Time_thetaPower.	Alcohol	prestim	PL	10	215.9	153.28	160.28	196.46	122.61	65.74	521.59	455.86	0.81	-0.87	48.47
Time_thetaPower.	Control	stim	PL	10	128.3	145.94	74.57	84.79	13.1	64.07	540.6	476.53	2.22	3.38	46.15
Time_thetaPower.	Alcohol	stim	PL	10	151.63	80.42	148.5	146.09	53.64	24.72	322.84	298.12	0.55	-0.2	25.43
Freq_thetaPower.	Control	prestim	PR	10	7.18	1.15	7.5	7.46	0.69	4.12	7.97	3.85	-1.77	2.05	0.36
Freq_thetaPower.	Alcohol	prestim	PR	10	6.8	0.74	6.59	6.8	0.54	5.68	7.97	2.29	0.25	-1.35	0.23
Freq_thetaPower.	Control	stim	PR	10	7.91	0.11	7.96	7.94	0.01	7.6	7.97	0.37	-2.04	2.8	0.04
Freq_thetaPower.	Alcohol	stim	PR	10	6.8	0.97	6.69	6.9	0.56	4.85	7.97	3.11	-0.33	-0.76	0.31
Freq_thetaPower.	Control	prestim	MR	10	7.19	1.21	7.51	7.46	0.68	4.21	7.97	3.75	-1.49	0.86	0.38
Freq_thetaPower.	Alcohol	prestim	MR	10	7.05	0.7	7.03	7.07	0.85	6.04	7.97	1.92	0.12	-1.67	0.22
Freq_thetaPower.	Control	stim	MR	10	7.87	0.2	7.95	7.93	0.02	7.32	7.97	0.64	-2	2.62	0.06
Freq_thetaPower.	Alcohol	stim	MR	10	7.2	0.82	7.32	7.29	0.95	5.68	7.97	2.29	-0.51	-1.33	0.26
Freq_thetaPower.	Control	prestim	FR	10	7.84	0.19	7.97	7.87	0	7.51	7.97	0.46	-0.76	-1.43	0.06
Freq_thetaPower.	Alcohol	prestim	FR	10	6.73	0.97	6.5	6.79	0.63	5.04	7.97	2.93	0.01	-1.26	0.31
Freq_thetaPower.	Control	stim	FR	10	7.71	0.24	7.69	7.74	0.09	7.14	7.97	0.82	-0.88	0.25	0.08
Freq_thetaPower.	Alcohol	stim	FR	10	7.14	0.67	7.12	7.19	0.57	5.95	7.97	2.01	-0.49	-1.05	0.21
Freq_thetaPower.	Control	prestim	FC	10	7.26	0.62	7.19	7.3	0.81	6.23	7.97	1.74	-0.41	-1.28	0.2
Freq_thetaPower.	Alcohol	prestim	FC	10	6.76	0.94	6.51	6.81	0.41	5.13	7.97	2.84	0.06	-1.24	0.3
Freq_thetaPower.	Control	stim	FC	10	7.52	0.77	7.85	7.72	0.18	5.49	7.97	2.47	-1.77	1.97	0.24
Freq_thetaPower.	Alcohol	stim	FC	10	7.31	0.53	7.49	7.38	0.27	6.13	7.97	1.83	-0.93	-0.19	0.17
Freq_thetaPower.	Control	prestim	PC	10	7.35	0.89	7.69	7.54	0.4	5.22	7.97	2.75	-1.32	0.43	0.28
Freq_thetaPower.	Alcohol	prestim	PC	10	6.85	0.98	6.93	6.93	1.46	5.13	7.97	2.84	-0.26	-1.38	0.31
Freq_thetaPower.	Control	stim	PC	10	7.89	0.14	7.94	7.92	0.04	7.51	7.97	0.46	-1.74	1.77	0.05
Freq_thetaPower.	Alcohol	stim	PC	10	6.56	0.84	6.77	6.63	0.87	4.85	7.69	2.84	-0.57	-0.73	0.26
Freq_thetaPower.	Control	prestim	MC	10	7.07	1.13	7.71	7.24	0.37	4.85	7.97	3.11	-0.67	-1.17	0.36
Freq_thetaPower.	Alcohol	prestim	MC	10	7.59	0.59	7.84	7.69	0.18	6.41	7.97	1.56	-1.17	-0.47	0.19
Freq_thetaPower.	Control	stim	MC	10	7.88	0.23	7.97	7.95	0	7.23	7.97	0.73	-2.25	3.5	0.07
Freq_thetaPower.	Alcohol	stim	MC	10	6.92	1.03	7.03	7.03	1.36	4.94	7.97	3.02	-0.48	-1.19	0.33
Freq_thetaPower.	Control	prestim	FL	10	7.57	0.64	7.97	7.7	0	6.13	7.97	1.83	-1.21	-0.05	0.2
Freq_thetaPower.	Alcohol	prestim	FL	10	6.87	0.89	6.68	6.92	0.61	5.31	7.97	2.66	-0.04	-1.29	0.28
Freq_thetaPower.	Control	stim	FL	10	7.75	0.35	7.93	7.82	0.05	6.96	7.97	1.01	-1.2	-0.03	0.11
Freq_thetaPower.	Alcohol	stim	FL	10	7.19	0.64	7.35	7.22	0.91	6.23	7.97	1.74	-0.15	-1.75	0.2
Freq_thetaPower.	Control	prestim	ML	10	6.41	1.13	6.5	6.51	1.22	4.03	7.97	3.94	-0.56	-0.51	0.36
Freq_thetaPower.	Alcohol	prestim	ML	10	7.14	0.61	7.29	7.14	0.75	6.32	7.97	1.65	-0.11	-1.54	0.19
Freq_thetaPower.	Control	stim	ML	10	7.86	0.14	7.91	7.87	0.08	7.6	7.97	0.37	-0.72	-1.34	0.04
Freq_thetaPower.	Alcohol	stim	ML	10	6.94	0.57	7.06	6.9	0.81	6.32	7.97	1.65	0.29	-1.37	0.18
Freq_thetaPower.	Control	prestim	PL	10	7.35	0.84	7.74	7.51	0.33	5.49	7.97	2.47	-1.06	-0.3	0.27
Freq_thetaPower.	Alcohol	prestim	PL	10	6.69	0.85	6.55	6.72	0.44	5.13	7.97	2.84	0.05	-0.85	0.27
Freq_thetaPower.	Control	stim	PL	10	7.87	0.2	7.93	7.93	0.05	7.32	7.97	0.64	-2.1	3.04	0.06
Freq_thetaPower.	Alcohol	stim	PL	10	6.97	0.69	6.83	6.98	0.63	5.95	7.97	2.01	0.19	-1.41	0.22
Time_alphaPower.	Control	prestim	PR	10	118.64	124.77	79.91	85.14	12.85	37.39	467.9	430.51	2.14	3.17	39.46
Time_alphaPower.	Alcohol	prestim	PR	10	189.62	139.7	165.25	164.56	79.8	61.07	518.59	457.52	1.23	0.35	44.18
Time_alphaPower.	Control	stim	PR	10	75.09	6.04	77.44	76.22	1.44	61.07	80.08	19.01	-1.34	0.26	1.91
Time_alphaPower.	Alcohol	stim	PR	10	124.27	79.55	91.91	105.76	22.25	67.4	329.18	261.78	1.64	1.48	25.16
Time_alphaPower.	Control	prestim	MR	10	73.97	15.22	72.91	75.61	3.71	39.06	95.75	56.69	-0.76	0.35	4.81
Time_alphaPower.	Alcohol	prestim	MR	10	113.77	70.86	107.64	106.22	60.89	28.05	259.82	231.76	0.81	-0.61	22.41
Time_alphaPower.	Control	stim	MR	10	74.94	6.37	76.66	75.65	3.46	61.07	83.08	22.01	-0.91	-0.24	2.01
Time_alphaPower.	Alcohol	stim	MR	10	132.78	87.25	101.34	110.86	37.07	75.41	365.53	290.12	1.81	2.12	27.59
Time_alphaPower.	Control	prestim	FR	10	74.56	14.18	75.41	76.73	5.69	39.06	92.75	53.69	-1.3	1.25	4.48
Time_alphaPower.	Alcohol	prestim	FR	10	143.3	74.48	131.42	142.56	72.43	32.72	259.82	227.09	0.25	-1.29	23.55
Time_alphaPower.	Control	stim	FR	10	110.59	90.95	81.76	83.74	9.39	67.4	368.53	301.13	2.25	3.48	28.76
Time_alphaPower.	Alcohol	stim	FR	10	144.57	70.82	133.81	130.73	22.05	75.41	324.51	249.1	1.48	1.35	22.39
Time_alphaPower.	Control	prestim	FC	10	135.3	128.05	89.58	106.38	22.99	35.72	466.24	430.51	1.69	1.56	40.49
Time_alphaPower.	Alcohol	prestim	FC	10	166.73	73.31	175.18	167.09	99.77	69.07	261.48	192.41	-0.07	-1.82	23.18
Time_alphaPower.	Control	stim	FC	10	79.35	7.68	80.62	79.59	6.92	65.74	91.08	25.34	-0.34	-1.05	2.43
Time_alphaPower.	Alcohol	stim	FC	10	113.78	37.09	102.12	109.2	4.06	78.41	185.79	107.38	1.07	-0.55	11.73
Time_alphaPower.	Control	prestim	PC	10	128.36	164.88	82.24	81.11	11.46	39.06	595.62	556.57	2.24	3.46	52.14
Time_alphaPower.	Alcohol	prestim	PC	10	164.53	79.65	154.11	152.34	47.96	67.4	359.19	291.79	1.19	0.88	25.19
Time_alphaPower.	Control	stim	PC	10	71.46	6.55	71.68	71.89	5.93	59.4	80.08	20.68	-0.31	-1.06	2.07
Time_alphaPower.	Alcohol	stim	PC	10	155.19	81.43	153.04	145.96	91.86	58.07	326.18	268.11	0.68	-0.63	25.75
Time_alphaPower.	Control	prestim	MC	10	136.02	137.99	80.08	106.07	14.48	45.39	466.24	420.84	1.47	0.56	43.64
Time_alphaPower.	Alcohol	prestim	MC	10	100.93	66.47	79.12	90.97	29.24	26.39	255.15	228.76	1.12	0.15	21.02
Time_alphaPower.	Control	stim	MC	10	76.23	6.3	76.81	76.85	3.46	62.73	84.74	22.01	-0.52	-0.2	1.99
Time_alphaPower.	Alcohol	stim	MC	10	140.68	74.84	133.22	126.69	40.36	65.74	327.51	261.78	1.34	1.1	23.67
Time_alphaPower.	Control	prestim	FL	10	118.66	121.95	83.08	85.7	15.33	40.73	460.23	419.51	2.15	3.18	38.56
Time_alphaPower.	Alcohol	prestim	FL	10	128.52	64.58	123.21	124.5	47.64	29.39	259.82	230.43	0.57	-0.52	20.42
Time_alphaPower.	Control	stim	FL	10	80.16	12.27	78.78	78.22	3.46	65.74	110.09	44.35	1.19	0.87	3.88
Time_alphaPower.	Alcohol	stim	FL	10	151.24	84.49	138.27	133.56	52.65	75.41	368.53	293.12	1.54	1.51	26.72
Time_alphaPower.	Control	prestim	ML	10	202.06	200.57	89.41	173.23	32.85	42.06	592.62	550.56	0.89	-1.07	63.42
Time_alphaPower.	Alcohol	prestim	ML	10	125.5	65.73	114.97	120.9	42.02	28.05	259.82	231.76	0.62	-0.53	20.79
Time_alphaPower.	Control	stim	ML	10	74.48	6.83	73.94	74.5	4.7	64.07	84.74	20.68	0.13	-1.16	2.16
Time_alphaPower.	Alcohol	stim	ML	10	141.19	77.95	132.55	131.04	26.95	32.72	330.85	298.12	1.13	0.93	24.65
Time_alphaPower.	Control	prestim	PL	10	129.41	131.36	82.65	98.39	25.71	42.06	464.9	422.84	1.65	1.37	41.54
Time_alphaPower.	Alcohol	prestim	PL	10	197.38	165.84	135.1	178.82	136.4	20.05	523.26	503.21	0.77	-0.92	52.44
Time_alphaPower.	Control	stim	PL	10	74.92	7.3	76.4	74.84	3.77	62.73	87.74	25.01	-0.12	-0.95	2.31
Time_alphaPower.	Alcohol	stim	PL	10	136.45	76.47	131.1	123.33	55.87	51.73	326.18	274.45	1.33	1.01	24.18
Freq_alphaPower.	Control	prestim	PR	10	9.15	1.54	8.33	8.94	0.41	8.06	11.99	3.94	0.78	-1.3	0.49
Freq_alphaPower.	Alcohol	prestim	PR	10	8.36	0.96	8.06	8.06	0	8.06	11.08	3.02	2.28	3.57	0.3
Freq_alphaPower.	Control	stim	PR	10	9.11	1.14	8.79	8.91	0.14	8.06	11.72	3.66	1.22	0.14	0.36
Freq_alphaPower.	Alcohol	stim	PR	10	8.77	1.23	8.26	8.45	0.3	8.06	11.99	3.94	1.73	1.83	0.39
Freq_alphaPower.	Control	prestim	MR	10	9.57	1.64	9.06	9.45	1.49	8.06	11.99	3.94	0.35	-1.78	0.52
Freq_alphaPower.	Alcohol	prestim	MR	10	8.73	1.41	8.06	8.41	0	8.06	11.99	3.94	1.42	0.25	0.45
Freq_alphaPower.	Control	stim	MR	10	8.88	0.87	8.93	8.76	1.15	8.06	10.71	2.66	0.78	-0.61	0.28
Freq_alphaPower.	Alcohol	stim	MR	10	8.76	1.25	8.17	8.44	0.17	8.06	11.99	3.94	1.65	1.51	0.4
Freq_alphaPower.	Control	prestim	FR	10	9.16	1.02	9.06	9.1	1.49	8.06	10.71	2.66	0.33	-1.56	0.32
Freq_alphaPower.	Alcohol	prestim	FR	10	8.51	1.23	8.06	8.13	0	8.06	11.99	3.94	2.22	3.4	0.39
Freq_alphaPower.	Control	stim	FR	10	8.17	0.32	8.06	8.07	0	8.06	9.06	1.01	2.25	3.49	0.1
Freq_alphaPower.	Alcohol	stim	FR	10	8.36	0.64	8.19	8.18	0.2	8.06	10.16	2.11	2.15	3.17	0.2
Freq_alphaPower.	Control	prestim	FC	10	8.47	0.87	8.06	8.3	0	8.06	10.25	2.2	1.3	-0.29	0.28
Freq_alphaPower.	Alcohol	prestim	FC	10	8.88	1.64	8.06	8.6	0	8.06	11.99	3.94	1.27	-0.38	0.52
Freq_alphaPower.	Control	stim	FC	10	8.92	0.98	8.81	8.81	1.11	8.06	10.71	2.66	0.66	-1.18	0.31
Freq_alphaPower.	Alcohol	stim	FC	10	8.06	0	8.06	8.06	0	8.06	8.06	0			0
Freq_alphaPower.	Control	prestim	PC	10	8.9	1.33	8.4	8.62	0.51	8.06	11.99	3.94	1.35	0.25	0.42
Freq_alphaPower.	Alcohol	prestim	PC	10	8.47	1.24	8.06	8.09	0	8.06	11.99	3.94	2.27	3.54	0.39
Freq_alphaPower.	Control	stim	PC	10	9.07	1.24	8.73	8.83	0.75	8.06	11.99	3.94	1.26	0.34	0.39
Freq_alphaPower.	Alcohol	stim	PC	10	8.46	1.24	8.06	8.07	0	8.06	11.99	3.94	2.28	3.56	0.39
Freq_alphaPower.	Control	prestim	MC	10	9.14	1.37	8.65	8.92	0.88	8.06	11.99	3.94	0.98	-0.63	0.43
Freq_alphaPower.	Alcohol	prestim	MC	10	10.26	1.64	10.63	10.32	2.02	8.06	11.99	3.94	-0.37	-1.63	0.52
Freq_alphaPower.	Control	stim	MC	10	8.6	0.69	8.62	8.45	0.61	8.06	10.35	2.29	1.41	1.18	0.22
Freq_alphaPower.	Alcohol	stim	MC	10	8.98	1.6	8.27	8.72	0.32	8.06	11.99	3.94	1.24	-0.43	0.51
Freq_alphaPower.	Control	prestim	FL	10	8.62	0.7	8.33	8.54	0.41	8.06	9.8	1.74	0.67	-1.45	0.22
Freq_alphaPower.	Alcohol	prestim	FL	10	8.88	1.64	8.06	8.6	0	8.06	11.99	3.94	1.27	-0.38	0.52
Freq_alphaPower.	Control	stim	FL	10	8.64	0.72	8.47	8.5	0.48	8.06	10.35	2.29	1.26	0.43	0.23
Freq_alphaPower.	Alcohol	stim	FL	10	8.52	1.24	8.06	8.14	0	8.06	11.99	3.94	2.18	3.24	0.39
Freq_alphaPower.	Control	prestim	ML	10	8.43	0.61	8.06	8.32	0	8.06	9.7	1.65	0.98	-0.78	0.19
Freq_alphaPower.	Alcohol	prestim	ML	10	8.61	1.26	8.06	8.26	0	8.06	11.99	3.94	1.92	2.32	0.4
Freq_alphaPower.	Control	stim	ML	10	9.14	1.04	8.87	9.02	1.21	8.06	11.17	3.11	0.59	-0.98	0.33
Freq_alphaPower.	Alcohol	stim	ML	10	8.07	0.03	8.06	8.06	0	8.06	8.15	0.09	2.27	3.55	0.01
Freq_alphaPower.	Control	prestim	PL	10	8.65	0.6	8.65	8.6	0.81	8.06	9.7	1.65	0.27	-1.55	0.19
Freq_alphaPower.	Alcohol	prestim	PL	10	8.42	1.13	8.06	8.06	0	8.06	11.63	3.57	2.28	3.57	0.36
Freq_alphaPower.	Control	stim	PL	10	10.46	1.1	10.41	10.57	0.47	8.06	11.99	3.94	-0.51	0.02	0.35
Freq_alphaPower.	Alcohol	stim	PL	10	8.94	1.45	8.27	8.67	0.32	8.06	11.99	3.94	1.21	-0.34	0.46
Time_betaPower.	Control	prestim	PR	10	115.16	115.66	78.41	82.96	10.63	48.4	439.56	391.16	2.16	3.21	36.57
Time_betaPower.	Alcohol	prestim	PR	10	91.76	63.47	76.91	80.3	29.17	28.05	247.14	219.09	1.36	0.8	20.07
Time_betaPower.	Control	stim	PR	10	74.11	6.27	76.41	74.99	1.23	61.07	80.08	19.01	-1.16	-0.37	1.98
Time_betaPower.	Alcohol	stim	PR	10	156.73	152.28	76.67	124.45	17.2	62.73	508.92	446.19	1.31	0.16	48.15
Time_betaPower.	Control	prestim	MR	10	72.54	9.45	72.07	73.07	3.71	53.06	87.74	34.68	-0.39	-0.31	2.99
Time_betaPower.	Alcohol	prestim	MR	10	119.24	164.83	58.73	73.05	29.17	28.05	579.95	551.9	2.13	3.13	52.12
Time_betaPower.	Control	stim	MR	10	72.07	7.42	74.34	72.65	6.03	59.4	80.08	20.68	-0.59	-1.32	2.35
Time_betaPower.	Alcohol	stim	MR	10	155.53	150.98	83.24	123.54	33.87	58.07	508.92	450.85	1.39	0.33	47.74
Time_betaPower.	Control	prestim	FR	10	75.35	9.46	76.47	76.76	3.46	51.73	87.74	36.02	-1.27	1.23	2.99
Time_betaPower.	Alcohol	prestim	FR	10	56.7	18.5	54.89	55.4	18.79	32.72	91.08	58.36	0.44	-1.18	5.85
Time_betaPower.	Control	stim	FR	10	77.81	6.08	79.15	78.67	4.7	64.07	84.74	20.68	-0.9	-0.01	1.92
Time_betaPower.	Alcohol	stim	FR	10	126.71	81.74	108.34	110.4	37.46	53.06	330.85	277.78	1.48	1.05	25.85
Time_betaPower.	Control	prestim	FC	10	132.26	122.3	83.08	103.96	4.7	53.06	437.89	384.83	1.6	1.06	38.67
Time_betaPower.	Alcohol	prestim	FC	10	104.51	55.73	76.74	97.24	40.79	43.73	223.47	179.74	0.8	-0.63	17.62
Time_betaPower.	Control	stim	FC	10	76.54	7.26	78.73	77.07	5.21	64.07	84.74	20.68	-0.75	-1	2.3
Time_betaPower.	Alcohol	stim	FC	10	87.36	34.3	79.91	78.39	9.38	64.07	182.45	118.38	2.06	2.95	10.85
Time_betaPower.	Control	prestim	PC	10	127.51	168.65	76.28	77.51	6.01	48.4	606.63	558.23	2.26	3.53	53.33
Time_betaPower.	Alcohol	prestim	PC	10	80.67	38.42	72.91	76.86	24.47	40.73	151.1	110.38	0.89	-0.83	12.15
Time_betaPower.	Control	stim	PC	10	72.26	6.4	73.76	72.88	4.42	59.4	80.08	20.68	-0.74	-0.8	2.02
Time_betaPower.	Alcohol	stim	PC	10	133.93	93.08	95.77	117.42	44.53	62.73	337.18	274.45	1.02	-0.44	29.43
Time_betaPower.	Control	prestim	MC	10	163.43	194.9	76.74	119.62	13.84	65.74	611.63	545.89	1.41	0.23	61.63
Time_betaPower.	Alcohol	prestim	MC	10	81.54	36.87	78.76	80.15	14.61	26.39	147.77	121.38	0.52	-0.81	11.66
Time_betaPower.	Control	stim	MC	10	76.09	7.32	78.14	77.09	5.69	61.07	83.08	22.01	-0.93	-0.63	2.31
Time_betaPower.	Alcohol	stim	MC	10	176.12	146.5	150.32	149.69	128.62	54.73	508.92	454.19	1.11	-0.03	46.33
Time_betaPower.	Control	prestim	FL	10	115.46	114.22	80.74	82.53	11.62	56.4	437.89	381.49	2.21	3.37	36.12
Time_betaPower.	Alcohol	prestim	FL	10	61.54	28.69	58.75	56.74	17.58	29.39	132.1	102.71	1.25	0.9	9.07
Time_betaPower.	Control	stim	FL	10	76.74	7.85	75.41	76.32	4.45	65.74	91.08	25.34	0.25	-0.88	2.48
Time_betaPower.	Alcohol	stim	FL	10	173.85	150.38	102.92	146.65	67.73	56.4	508.92	452.52	1.11	-0.2	47.56
Time_betaPower.	Control	prestim	ML	10	133.54	125.01	80.08	103.77	14.43	64.07	441.23	377.16	1.56	0.87	39.53
Time_betaPower.	Alcohol	prestim	ML	10	73.1	38.26	64.24	69.6	31.83	28.05	146.1	118.05	0.68	-0.96	12.1
Time_betaPower.	Control	stim	ML	10	74.25	6.64	75.28	74.63	9.09	64.07	81.41	17.34	-0.39	-1.45	2.1
Time_betaPower.	Alcohol	stim	ML	10	167.19	149.29	119.46	139.74	86.57	46.73	507.25	460.53	1.17	0	47.21
Time_betaPower.	Control	prestim	PL	10	166.99	192.9	78.41	124.27	11.62	69.07	606.63	537.56	1.4	0.16	61
Time_betaPower.	Alcohol	prestim	PL	10	110.78	120.35	61.07	81.65	33.87	29.39	425.22	395.83	1.7	1.73	38.06
Time_betaPower.	Control	stim	PL	10	74.74	6.12	77.16	75.24	2.78	64.07	81.41	17.34	-0.69	-1.31	1.94
Time_betaPower.	Alcohol	stim	PL	10	121.1	85.76	93.65	102.43	30.63	53.06	338.52	285.45	1.57	1.26	27.12
Freq_betaPower.	Control	prestim	PR	10	12.37	0.84	12.08	12.1	0	12.08	14.74	2.66	2.26	3.52	0.26
Freq_betaPower.	Alcohol	prestim	PR	10	13.56	2.5	12.68	12.93	0.88	12.08	20.14	8.06	1.74	1.88	0.79
Freq_betaPower.	Control	stim	PR	10	12.08	0	12.08	12.08	0	12.08	12.08	0	-0.89	-1.4	0
Freq_betaPower.	Alcohol	stim	PR	10	12.68	1.5	12.08	12.24	0	12.08	16.85	4.76	2.09	2.92	0.48
Freq_betaPower.	Control	prestim	MR	10	12.39	0.96	12.08	12.08	0	12.08	15.11	3.02	2.28	3.57	0.3
Freq_betaPower.	Alcohol	prestim	MR	10	14.68	5.62	12.08	13.25	0	12.08	28.75	16.66	1.61	1.08	1.78
Freq_betaPower.	Control	stim	MR	10	12.08	0	12.08	12.08	0	12.08	12.08	0	-0.89	-1.4	0
Freq_betaPower.	Alcohol	stim	MR	10	13.19	2.14	12.08	12.79	0	12.08	17.49	5.4	1.25	-0.38	0.68
Freq_betaPower.	Control	prestim	FR	10	12.08	0	12.08	12.08	0	12.08	12.08	0	-2.35	3.82	0
Freq_betaPower.	Alcohol	prestim	FR	10	17.77	5.85	16.53	17.46	6.58	12.08	25.91	13.82	0.2	-1.93	1.85
Freq_betaPower.	Control	stim	FR	10	12.08	0	12.08	12.08	0	12.08	12.08	0	-0.89	-1.4	0
Freq_betaPower.	Alcohol	stim	FR	10	12.08	0	12.08	12.08	0	12.08	12.08	0	-0.53	-1.94	0
Freq_betaPower.	Control	prestim	FC	10	12.08	0	12.08	12.08	0	12.08	12.08	0			0
Freq_betaPower.	Alcohol	prestim	FC	10	17.34	5.36	17.03	16.88	7.33	12.08	26.28	14.19	0.28	-1.65	1.7
Freq_betaPower.	Control	stim	FC	10	12.08	0	12.08	12.08	0	12.08	12.08	0	-1.39	-0.15	0
Freq_betaPower.	Alcohol	stim	FC	10	13.26	3.61	12.08	12.13	0	12.08	23.53	11.44	2.28	3.57	1.14
Freq_betaPower.	Control	prestim	PC	10	12.09	0.03	12.08	12.08	0	12.08	12.18	0.09	2.28	3.57	0.01
Freq_betaPower.	Alcohol	prestim	PC	10	17.75	5.88	17.35	17.18	7.8	12.08	28.02	15.93	0.43	-1.39	1.86
Freq_betaPower.	Control	stim	PC	10	13.04	2.95	12.08	12.11	0	12.08	21.42	9.34	2.28	3.56	0.93
Freq_betaPower.	Alcohol	stim	PC	10	14.56	4.42	12.08	13.83	0	12.08	22.89	10.8	1.21	-0.46	1.4
Freq_betaPower.	Control	prestim	MC	10	12.25	0.52	12.08	12.09	0	12.08	13.73	1.65	2.28	3.57	0.16
Freq_betaPower.	Alcohol	prestim	MC	10	16.82	5.34	14.95	16.22	4.25	12.08	26.37	14.28	0.77	-1.14	1.69
Freq_betaPower.	Control	stim	MC	10	12.08	0	12.08	12.08	0	12.08	12.08	0	-0.89	-1.4	0
Freq_betaPower.	Alcohol	stim	MC	10	14.54	3.51	12.82	13.95	1.09	12.08	21.7	9.61	0.94	-0.82	1.11
Freq_betaPower.	Control	prestim	FL	10	12.08	0	12.08	12.08	0	12.08	12.08	0			0
Freq_betaPower.	Alcohol	prestim	FL	10	18.29	5.75	18.78	18.05	8.6	12.08	26.37	14.28	0.1	-1.84	1.82
Freq_betaPower.	Control	stim	FL	10	12.08	0	12.08	12.08	0	12.08	12.08	0	-1.39	-0.15	0
Freq_betaPower.	Alcohol	stim	FL	10	13.37	2.58	12.08	12.79	0	12.08	19.32	7.23	1.4	0.23	0.82
Freq_betaPower.	Control	prestim	ML	10	12.31	0.66	12.08	12.1	0	12.08	14.19	2.11	2.26	3.51	0.21
Freq_betaPower.	Alcohol	prestim	ML	10	17.23	6.03	14.03	16.73	2.89	12.08	26.37	14.28	0.44	-1.8	1.91
Freq_betaPower.	Control	stim	ML	10	12.08	0	12.08	12.08	0	12.08	12.08	0	-0.89	-1.4	0
Freq_betaPower.	Alcohol	stim	ML	10	14.17	3.81	12.37	13.2	0.42	12.08	23.99	11.9	1.65	1.48	1.21
Freq_betaPower.	Control	prestim	PL	10	12.57	1	12.08	12.39	0	12.08	14.47	2.38	1.28	-0.37	0.32
Freq_betaPower.	Alcohol	prestim	PL	10	15.98	5.3	12.85	15.17	1.14	12.08	26.37	14.28	0.81	-1.06	1.68
Freq_betaPower.	Control	stim	PL	10	13.45	2.84	12.25	12.71	0.25	12.08	20.69	8.61	1.68	1.34	0.9
Freq_betaPower.	Alcohol	stim	PL	10	13.16	3.29	12.08	12.12	0	12.08	22.52	10.44	2.28	3.57	1.04
Time_gammaPower.	Control	prestim	PR	10	281.54	206.79	296	269.05	285.38	48.4	614.63	566.24	0.17	-1.61	65.39
Time_gammaPower.	Alcohol	prestim	PR	10	112.61	169.92	57.9	69.31	14.09	-14.63	586.29	600.92	2.1	3.08	53.73
Time_gammaPower.	Control	stim	PR	10	56.46	4.95	56.38	56.73	3.71	46.73	64.07	17.34	-0.25	-0.64	1.57
Time_gammaPower.	Alcohol	stim	PR	10	89.26	82.65	60.34	64.38	8.31	54.73	322.84	268.11	2.22	3.39	26.14
Time_gammaPower.	Control	prestim	MR	10	149.04	163.99	53.9	133.39	53.89	-14.63	437.89	452.52	0.75	-1.31	51.86
Time_gammaPower.	Alcohol	prestim	MR	10	245.61	230.17	178.62	239.89	243.25	-14.63	551.6	566.24	0.22	-1.9	72.79
Time_gammaPower.	Control	stim	MR	10	55.21	11.5	55.12	55.34	3.71	32.72	76.74	44.02	-0.08	-0.18	3.64
Time_gammaPower.	Alcohol	stim	MR	10	91.03	84.14	61.9	66.17	11.62	51.73	329.18	277.45	2.23	3.43	26.61
Time_gammaPower.	Control	prestim	FR	10	330.16	233.64	338.91	331.61	344.26	48.4	600.29	551.9	-0.08	-1.89	73.88
Time_gammaPower.	Alcohol	prestim	FR	10	132.15	178.75	56.23	101.61	17.55	-14.63	523.26	537.89	1.29	-0.11	56.53
Time_gammaPower.	Control	stim	FR	10	62.31	22.74	56.62	61.25	7.33	31.05	102.08	71.03	0.76	-0.74	7.19
Time_gammaPower.	Alcohol	stim	FR	10	109.27	84.04	82.42	89.19	22.26	48.4	330.85	282.45	1.77	1.9	26.58
Time_gammaPower.	Control	prestim	FC	10	280.26	225.78	308.67	276.7	344.85	-6.63	595.62	602.25	0.03	-1.83	71.4
Time_gammaPower.	Alcohol	prestim	FC	10	90.45	127.94	56.4	58.94	16.32	-14.63	447.56	462.19	2.1	3.12	40.46
Time_gammaPower.	Control	stim	FC	10	58.52	18.28	56.78	56.3	5.51	31.05	103.75	72.7	1.16	1.27	5.78
Time_gammaPower.	Alcohol	stim	FC	10	59.11	5.31	57.84	59	5.69	51.73	67.4	15.67	0.11	-1.34	1.68
Time_gammaPower.	Control	prestim	PC	10	276.16	172.1	300.83	276.7	176.5	29.39	518.59	489.2	-0.24	-1.6	54.42
Time_gammaPower.	Alcohol	prestim	PC	10	107.57	140.75	57.23	65.17	10.63	48.4	505.92	457.52	2.23	3.43	44.51
Time_gammaPower.	Control	stim	PC	10	53.86	6.12	54.98	55.02	4.57	39.06	59.4	20.34	-1.31	0.63	1.93
Time_gammaPower.	Alcohol	stim	PC	10	206.47	209.83	110.02	179.54	84.2	50.06	578.28	528.22	0.88	-1.06	66.35
Time_gammaPower.	Control	prestim	MC	10	277.41	217.78	342.44	268.22	310.1	13.71	614.63	600.92	0.01	-1.74	68.87
Time_gammaPower.	Alcohol	prestim	MC	10	95.57	122.11	62.57	67.14	28.64	-14.63	433.22	447.85	2.02	2.92	38.61
Time_gammaPower.	Control	stim	MC	10	54.74	5.35	54.65	54.57	4.33	46.73	64.07	17.34	0.43	-1	1.69
Time_gammaPower.	Alcohol	stim	MC	10	150.64	165.86	72.91	112.09	29.17	51.73	557.94	506.21	1.51	0.83	52.45
Time_gammaPower.	Control	prestim	FL	10	272.22	195.49	293.66	261.32	217.54	26.39	605.29	578.91	0.14	-1.39	61.82
Time_gammaPower.	Alcohol	prestim	FL	10	85.22	122.8	54.13	54.79	6.92	-14.63	428.55	443.18	2.12	3.16	38.83
Time_gammaPower.	Control	stim	FL	10	63.15	19.51	60.4	63.3	10.81	31.05	94.08	63.03	0.27	-0.95	6.17
Time_gammaPower.	Alcohol	stim	FL	10	93.08	85.7	61.73	68.53	10.38	51.73	330.85	279.12	2.09	2.95	27.1
Time_gammaPower.	Control	prestim	ML	10	387.08	218.41	448.46	400.97	197.18	48.4	614.63	566.24	-0.45	-1.63	69.07
Time_gammaPower.	Alcohol	prestim	ML	10	86.32	122.63	54.73	56.17	15.08	-14.63	428.55	443.18	2.1	3.12	38.78
Time_gammaPower.	Control	stim	ML	10	54.99	9.36	58.34	56.22	3.46	32.72	67.4	34.68	-1.15	0.59	2.96
Time_gammaPower.	Alcohol	stim	ML	10	161.52	166.71	66.57	125.53	21.01	51.73	559.27	507.54	1.32	0.43	52.72
Time_gammaPower.	Control	prestim	PL	10	283.11	248.05	234.54	276.72	320.23	2.71	614.63	611.92	0.14	-1.95	78.44
Time_gammaPower.	Alcohol	prestim	PL	10	96.25	158.81	53.23	54.2	9.39	-14.63	543.6	558.23	2.18	3.32	50.22
Time_gammaPower.	Control	stim	PL	10	86.24	69.56	70.39	66.73	10.27	46.73	281.83	235.1	2.17	3.28	22
Time_gammaPower.	Alcohol	stim	PL	10	148.12	167.82	72.97	108.77	30.5	51.73	559.27	507.54	1.5	0.79	53.07
Freq_gammaPower.	Control	prestim	PR	10	31.59	2.55	30.13	31.09	0.15	30.03	37.17	7.14	1.21	-0.21	0.81
Freq_gammaPower.	Alcohol	prestim	PR	10	30.14	0.29	30.03	30.05	0	30.03	30.94	0.92	2.19	3.3	0.09
Freq_gammaPower.	Control	stim	PR	10	30.03	0	30.03	30.03	0	30.03	30.03	0	-0.55	-1.77	0
Freq_gammaPower.	Alcohol	stim	PR	10	31.29	2.78	30.03	30.55	0	30.03	38.45	8.42	1.72	1.53	0.88
Freq_gammaPower.	Control	prestim	MR	10	30.56	1.59	30.03	30.06	0	30.03	35.06	5.04	2.26	3.53	0.5
Freq_gammaPower.	Alcohol	prestim	MR	10	30.7	1.53	30.03	30.26	0	30.03	34.88	4.85	1.99	2.63	0.48
Freq_gammaPower.	Control	stim	MR	10	30.03	0	30.03	30.03	0	30.03	30.03	0	-0.55	-1.77	0
Freq_gammaPower.	Alcohol	stim	MR	10	31.83	2.9	30.22	31.16	0.28	30.03	39	8.97	1.43	0.85	0.92
Freq_gammaPower.	Control	prestim	FR	10	31.57	2.87	30.71	30.77	1.01	30.03	39.46	9.43	2.02	2.8	0.91
Freq_gammaPower.	Alcohol	prestim	FR	10	30.03	0	30.03	30.03	0	30.03	30.03	0	-2.41	4.02	0
Freq_gammaPower.	Control	stim	FR	10	30.03	0	30.03	30.03	0	30.03	30.03	0	-0.55	-1.77	0
Freq_gammaPower.	Alcohol	stim	FR	10	31.03	2.43	30.19	30.3	0.23	30.03	37.9	7.87	2.22	3.39	0.77
Freq_gammaPower.	Control	prestim	FC	10	32.55	3.36	30.9	32.05	1.29	30.03	39	8.97	0.84	-1.05	1.06
Freq_gammaPower.	Alcohol	prestim	FC	10	30.03	0	30.03	30.03	0	30.03	30.03	0	-2.41	4.02	0
Freq_gammaPower.	Control	stim	FC	10	30.03	0	30.03	30.03	0	30.03	30.03	0	-1.48	0.03	0
Freq_gammaPower.	Alcohol	stim	FC	10	30.98	2.88	30.08	30.08	0.07	30.03	39.18	9.16	2.28	3.57	0.91
Freq_gammaPower.	Control	prestim	PC	10	31.44	3.04	30.03	30.58	0	30.03	39.73	9.7	1.97	2.54	0.96
Freq_gammaPower.	Alcohol	prestim	PC	10	30.42	1.07	30.03	30.1	0	30.03	33.42	3.39	2.18	3.24	0.34
Freq_gammaPower.	Control	stim	PC	10	30.03	0	30.03	30.03	0	30.03	30.03	0	-0.55	-1.77	0
Freq_gammaPower.	Alcohol	stim	PC	10	31.61	2.87	30.03	30.88	0	30.03	39.09	9.06	1.69	1.7	0.91
Freq_gammaPower.	Control	prestim	MC	10	31.19	2.59	30.03	30.52	0	30.03	37.72	7.69	1.64	1.18	0.82
Freq_gammaPower.	Alcohol	prestim	MC	10	30.3	0.54	30.03	30.16	0	30.03	31.77	1.74	1.92	2.47	0.17
Freq_gammaPower.	Control	stim	MC	10	30.03	0	30.03	30.03	0	30.03	30.03	0	-0.55	-1.77	0
Freq_gammaPower.	Alcohol	stim	MC	10	31.64	2.37	30.55	31.17	0.77	30.03	37.08	7.05	1.22	0.06	0.75
Freq_gammaPower.	Control	prestim	FL	10	32.18	3.55	30.03	31.68	0	30.03	38.36	8.33	0.86	-1.25	1.12
Freq_gammaPower.	Alcohol	prestim	FL	10	30.05	0.06	30.03	30.04	0	30.03	30.21	0.18	2.04	2.75	0.02
Freq_gammaPower.	Control	stim	FL	10	30.03	0	30.03	30.03	0	30.03	30.03	0	-1.48	0.03	0
Freq_gammaPower.	Alcohol	stim	FL	10	31.77	2.74	30.03	31.17	0	30.03	38.27	8.24	1.26	0.33	0.87
Freq_gammaPower.	Control	prestim	ML	10	31.83	3.05	30.17	31.33	0.2	30.03	37.72	7.69	1.1	-0.68	0.97
Freq_gammaPower.	Alcohol	prestim	ML	10	30.03	0	30.03	30.03	0	30.03	30.03	0	-2.41	4.02	0
Freq_gammaPower.	Control	stim	ML	10	30.03	0	30.03	30.03	0	30.03	30.03	0	-0.55	-1.77	0
Freq_gammaPower.	Alcohol	stim	ML	10	32.17	2.67	31.59	31.66	2.31	30.03	38.45	8.42	1.12	0.26	0.84
Freq_gammaPower.	Control	prestim	PL	10	32.67	4.18	30.03	32.16	0	30.03	39.37	9.34	0.79	-1.43	1.32
Freq_gammaPower.	Alcohol	prestim	PL	10	30.03	0	30.03	30.03	0	30.03	30.03	0	-2.41	4.02	0
Freq_gammaPower.	Control	stim	PL	10	30.62	1.53	30.08	30.15	0.07	30.03	34.97	4.94	2.24	3.47	0.49
Freq_gammaPower.	Alcohol	stim	PL	10	32.32	2.8	31.97	31.83	2.4	30.03	38.54	8.51	1.12	-0.13	0.88
