# Supplementary material for: Chronic alcohol-induced brain states limit propagation of direct cortical stimulation
Source: Sci Rep. 2025 Oct 10;15:35407. doi: 10.1038/s41598-025-21802-z (PMC12514308; doi:10.1038/s41598-025-21802-z)
Supplement: Supplementary file 2 — Supplementary Material 2 [file 41598_2025_21802_MOESM2_ESM.xlsx]

## Sheet: LatP1_rmANOVA
ANOVA.Effect	ANOVA.DFn	ANOVA.DFd	ANOVA.SSn	ANOVA.SSd	ANOVA.F	ANOVA.p	ANOVA.p..05	ANOVA.ges	Mauchly_Test.Effect	Mauchly_Test.W	Mauchly_Test.p	Mauchly_Test.p..05	Sphericity_Corrections.Effect	Sphericity_Corrections.GGe	Sphericity_Corrections.p.GG.	Sphericity_Corrections.p.GG...05	Sphericity_Corrections.HFe	Sphericity_Corrections.p.HF.	Sphericity_Corrections.p.HF...05
(Intercept)	1	18	1.11685e+06	4625.47	4346.21	6.41772e-23	*	0.990885	Channel	0.00080718	5.5565e-09	*	Channel	0.406824	0.672542		0.507253	0.71091
Group	1	18	67.7738	4625.47	0.263741	0.613808		0.0065536	Group:Channel	0.00080718	5.5565e-09	*	Group:Channel	0.406824	0.226205		0.507253	0.215568
Treatment	1	18	17.5178	2795.14	0.11281	0.74085		0.00170222	Treatment:Channel	0.000147788	6.12465e-13	*	Treatment:Channel	0.428865	0.180961		0.542137	0.165466
Channel	8	144	44.8176	1500.04	0.537798	0.826485		0.00434342	Group:Treatment:Channel	0.000147788	6.12465e-13	*	Group:Treatment:Channel	0.428865	0.525123		0.542137	0.550983
Group:Treatment	1	18	455.247	2795.14	2.93167	0.104032		0.0424317	Channel	0.00080718	5.5565e-09	*	Channel	0.406824	0.672542		0.507253	0.71091
Group:Channel	8	144	123.582	1500.04	1.48294	0.168261		0.011886	Group:Channel	0.00080718	5.5565e-09	*	Group:Channel	0.406824	0.226205		0.507253	0.215568
Treatment:Channel	8	144	124.036	1353.03	1.65011	0.115687		0.0119291	Treatment:Channel	0.000147788	6.12465e-13	*	Treatment:Channel	0.428865	0.180961		0.542137	0.165466
Group:Treatment:Channel	8	144	58.6112	1353.03	0.779734	0.621196		0.00567262	Group:Treatment:Channel	0.000147788	6.12465e-13	*	Group:Treatment:Channel	0.428865	0.525123		0.542137	0.550983

## Sheet: LatN1_rmANOVA
ANOVA.Effect	ANOVA.DFn	ANOVA.DFd	ANOVA.SSn	ANOVA.SSd	ANOVA.F	ANOVA.p	ANOVA.p..05	ANOVA.ges	Mauchly_Test.Effect	Mauchly_Test.W	Mauchly_Test.p	Mauchly_Test.p..05	Sphericity_Corrections.Effect	Sphericity_Corrections.GGe	Sphericity_Corrections.p.GG.	Sphericity_Corrections.p.GG...05	Sphericity_Corrections.HFe	Sphericity_Corrections.p.HF.	Sphericity_Corrections.p.HF...05
(Intercept)	1	18	2.61134e+06	11607.6	4049.42	1.20982e-22	*	0.985107	Channel	0.00296281	3.28682e-06	*	Channel	0.428727	0.254024		0.541916	0.245053
Group	1	18	13590.9	11607.6	21.0755	0.00022679	*	0.256094	Group:Channel	0.00296281	3.28682e-06	*	Group:Channel	0.428727	0.185096		0.541916	0.169891
Treatment	1	18	1229.51	15189.4	1.45702	0.243029		0.0302028	Treatment:Channel	0.00501847	3.56979e-05	*	Treatment:Channel	0.402878	0.40754		0.501095	0.417998
Channel	8	144	519.127	6757.24	1.38285	0.208715		0.0129788	Group:Treatment:Channel	0.00501847	3.56979e-05	*	Group:Treatment:Channel	0.402878	0.41508		0.501095	0.42649
Group:Treatment	1	18	1878	15189.4	2.2255	0.153068		0.0454094	Channel	0.00296281	3.28682e-06	*	Channel	0.428727	0.254024		0.541916	0.245053
Group:Channel	8	144	612.855	6757.24	1.63253	0.12043		0.0152863	Group:Channel	0.00296281	3.28682e-06	*	Group:Channel	0.428727	0.185096		0.541916	0.169891
Treatment:Channel	8	144	326.308	5924.77	0.991354	0.445344		0.0081976	Treatment:Channel	0.00501847	3.56979e-05	*	Treatment:Channel	0.402878	0.40754		0.501095	0.417998
Group:Treatment:Channel	8	144	321.095	5924.77	0.975516	0.457586		0.00806769	Group:Treatment:Channel	0.00501847	3.56979e-05	*	Group:Treatment:Channel	0.402878	0.41508		0.501095	0.42649

## Sheet: LatP2_rmANOVA
ANOVA.Effect	ANOVA.DFn	ANOVA.DFd	ANOVA.SSn	ANOVA.SSd	ANOVA.F	ANOVA.p	ANOVA.p..05	ANOVA.ges	Mauchly_Test.Effect	Mauchly_Test.W	Mauchly_Test.p	Mauchly_Test.p..05	Sphericity_Corrections.Effect	Sphericity_Corrections.GGe	Sphericity_Corrections.p.GG.	Sphericity_Corrections.p.GG...05	Sphericity_Corrections.HFe	Sphericity_Corrections.p.HF.	Sphericity_Corrections.p.HF...05
(Intercept)	1	18	5.46223e+06	89022.4	1104.44	1.3104e-17	*	0.956051	Channel	0.0101183	0.000674867	*	Channel	0.568921	0.0682285		0.785174	0.0456005	*
Group	1	18	51198.1	89022.4	10.3521	0.00477553	*	0.169365	Group:Channel	0.0101183	0.000674867	*	Group:Channel	0.568921	0.0591343		0.785174	0.0379334	*
Treatment	1	18	13600.1	134928	1.81432	0.194706		0.05138	Treatment:Channel	0.00258046	1.72131e-06	*	Treatment:Channel	0.479761	0.180373		0.626007	0.161761
Channel	8	144	1474.84	12081.2	2.19739	0.0308844	*	0.00583932	Group:Treatment:Channel	0.00258046	1.72131e-06	*	Group:Treatment:Channel	0.479761	0.641659		0.626007	0.68339
Group:Treatment	1	18	290.551	134928	0.0387609	0.846129		0.00115579	Channel	0.0101183	0.000674867	*	Channel	0.568921	0.0682285		0.785174	0.0456005	*
Group:Channel	8	144	1534.4	12081.2	2.28613	0.0246868	*	0.00607371	Group:Channel	0.0101183	0.000674867	*	Group:Channel	0.568921	0.0591343		0.785174	0.0379334	*
Treatment:Channel	8	144	1358.64	15064.8	1.62335	0.122973		0.0053817	Treatment:Channel	0.00258046	1.72131e-06	*	Treatment:Channel	0.479761	0.180373		0.626007	0.161761
Group:Treatment:Channel	8	144	520.803	15064.8	0.622277	0.75809		0.00206983	Group:Treatment:Channel	0.00258046	1.72131e-06	*	Group:Treatment:Channel	0.479761	0.641659		0.626007	0.68339

## Sheet: LatN2_rmANOVA
ANOVA.Effect	ANOVA.DFn	ANOVA.DFd	ANOVA.SSn	ANOVA.SSd	ANOVA.F	ANOVA.p	ANOVA.p..05	ANOVA.ges	Mauchly_Test.Effect	Mauchly_Test.W	Mauchly_Test.p	Mauchly_Test.p..05	Sphericity_Corrections.Effect	Sphericity_Corrections.GGe	Sphericity_Corrections.p.GG.	Sphericity_Corrections.p.GG...05	Sphericity_Corrections.HFe	Sphericity_Corrections.p.HF.	Sphericity_Corrections.p.HF...05
(Intercept)	1	18	8.08667e+06	183932	791.38	2.49315e-16	*	0.935684	Channel	0.000938127	1.19845e-08	*	Channel	0.450675	0.419457		0.577496	0.431627
Group	1	18	6144.45	183932	0.60131	0.448147		0.0109332	Group:Channel	0.000938127	1.19845e-08	*	Group:Channel	0.450675	0.335633		0.577496	0.33594
Treatment	1	18	86208.3	316796	4.89826	0.0400402	*	0.134268	Treatment:Channel	0.000123378	2.23298e-13	*	Treatment:Channel	0.458923	0.174083		0.591093	0.156328
Channel	8	144	1536.94	28268.4	0.978654	0.455147		0.00275739	Group:Treatment:Channel	0.000123378	2.23298e-13	*	Group:Treatment:Channel	0.458923	0.401854		0.591093	0.411474
Group:Treatment	1	18	7970.15	316796	0.452854	0.509531		0.0141359	Channel	0.000938127	1.19845e-08	*	Channel	0.450675	0.419457		0.577496	0.431627
Group:Channel	8	144	1820.44	28268.4	1.15917	0.327978		0.00326435	Group:Channel	0.000938127	1.19845e-08	*	Group:Channel	0.450675	0.335633		0.577496	0.33594
Treatment:Channel	8	144	2478.89	26856.5	1.66143	0.112722		0.00443982	Treatment:Channel	0.000123378	2.23298e-13	*	Treatment:Channel	0.458923	0.174083		0.591093	0.156328
Group:Treatment:Channel	8	144	1514.99	26856.5	1.01539	0.427124		0.00271812	Group:Treatment:Channel	0.000123378	2.23298e-13	*	Group:Treatment:Channel	0.458923	0.401854		0.591093	0.411474

## Sheet: LatP3_rmANOVA
ANOVA.Effect	ANOVA.DFn	ANOVA.DFd	ANOVA.SSn	ANOVA.SSd	ANOVA.F	ANOVA.p	ANOVA.p..05	ANOVA.ges	Mauchly_Test.Effect	Mauchly_Test.W	Mauchly_Test.p	Mauchly_Test.p..05	Sphericity_Corrections.Effect	Sphericity_Corrections.GGe	Sphericity_Corrections.p.GG.	Sphericity_Corrections.p.GG...05	Sphericity_Corrections.HFe	Sphericity_Corrections.p.HF.	Sphericity_Corrections.p.HF...05
(Intercept)	1	18	3.42769e+07	516350	1194.89	6.51989e-18	*	0.928718	Channel	0.02523	0.0184583	*	Channel	0.499776	0.0502933		0.660326	0.0334153	*
Group	1	18	67842.4	516350	2.36499	0.141478		0.025139	Group:Channel	0.02523	0.0184583	*	Group:Channel	0.499776	0.420394		0.660326	0.432809
Treatment	1	18	10584.8	1.30446e+06	0.146058	0.706806		0.00400725	Treatment:Channel	0.0346797	0.0488863	*	Treatment:Channel	0.604459	0.204915		0.853421	0.180583
Channel	8	144	54844.6	395619	2.49533	0.0144484	*	0.0204211	Group:Treatment:Channel	0.0346797	0.0488863	*	Group:Treatment:Channel	0.604459	0.523814		0.853421	0.556283
Group:Treatment	1	18	85884.6	1.30446e+06	1.1851	0.290681		0.0316133	Channel	0.02523	0.0184583	*	Channel	0.499776	0.0502933		0.660326	0.0334153	*
Group:Channel	8	144	21684.9	395619	0.986627	0.448978		0.0081752	Group:Channel	0.02523	0.0184583	*	Group:Channel	0.499776	0.420394		0.660326	0.432809
Treatment:Channel	8	144	34172.7	414409	1.4843	0.167761		0.0128227	Treatment:Channel	0.0346797	0.0488863	*	Treatment:Channel	0.604459	0.204915		0.853421	0.180583
Group:Treatment:Channel	8	144	19268.6	414409	0.83694	0.571565		0.00727088	Group:Treatment:Channel	0.0346797	0.0488863	*	Group:Treatment:Channel	0.604459	0.523814		0.853421	0.556283

## Sheet: AmplP1N1_rmANOVA
ANOVA.Effect	ANOVA.DFn	ANOVA.DFd	ANOVA.SSn	ANOVA.SSd	ANOVA.F	ANOVA.p	ANOVA.p..05	ANOVA.ges	Mauchly_Test.Effect	Mauchly_Test.W	Mauchly_Test.p	Mauchly_Test.p..05	Sphericity_Corrections.Effect	Sphericity_Corrections.GGe	Sphericity_Corrections.p.GG.	Sphericity_Corrections.p.GG...05	Sphericity_Corrections.HFe	Sphericity_Corrections.p.HF.	Sphericity_Corrections.p.HF...05
(Intercept)	1	18	530426	40014.7	238.604	7.87998e-12	*	0.779329	Channel	0.0358079	0.0535959		Channel	0.599811	0.01593	*	0.844329	0.00643675	*
Group	1	18	48651.2	40014.7	21.885	0.000187209	*	0.24467	Group:Channel	0.0358079	0.0535959		Group:Channel	0.599811	0.108043		0.844329	0.0801742
Treatment	1	18	56171.7	59453.5	17.0064	0.000637441	*	0.272196	Treatment:Channel	0.00767702	0.000219775	*	Treatment:Channel	0.453053	0.204932		0.581404	0.189849
Channel	8	144	3594.55	21433.1	3.01878	0.00365447	*	0.0233734	Group:Treatment:Channel	0.00767702	0.000219775	*	Group:Treatment:Channel	0.453053	0.255475		0.581404	0.245498
Group:Treatment	1	18	14262.4	59453.5	4.31805	0.0522927		0.0867249	Channel	0.0358079	0.0535959		Channel	0.599811	0.01593	*	0.844329	0.00643675	*
Group:Channel	8	144	2244.54	21433.1	1.88501	0.0666169		0.0147243	Group:Channel	0.0358079	0.0535959		Group:Channel	0.599811	0.108043		0.844329	0.0801742
Treatment:Channel	8	144	2508.68	29292	1.54159	0.147828		0.0164286	Treatment:Channel	0.00767702	0.000219775	*	Treatment:Channel	0.453053	0.204932		0.581404	0.189849
Group:Treatment:Channel	8	144	2233.98	29292	1.37279	0.213199		0.0146561	Group:Treatment:Channel	0.00767702	0.000219775	*	Group:Treatment:Channel	0.453053	0.255475		0.581404	0.245498

## Sheet: AmplN1P2_rmANOVA
ANOVA.Effect	ANOVA.DFn	ANOVA.DFd	ANOVA.SSn	ANOVA.SSd	ANOVA.F	ANOVA.p	ANOVA.p..05	ANOVA.ges	Mauchly_Test.Effect	Mauchly_Test.W	Mauchly_Test.p	Mauchly_Test.p..05	Sphericity_Corrections.Effect	Sphericity_Corrections.GGe	Sphericity_Corrections.p.GG.	Sphericity_Corrections.p.GG...05	Sphericity_Corrections.HFe	Sphericity_Corrections.p.HF.	Sphericity_Corrections.p.HF...05
(Intercept)	1	18	148917	35240.3	76.0637	7.01526e-08	*	0.642819	Channel	0.019381	0.0076303	*	Channel	0.57762	0.181585		0.801611	0.156875
Group	1	18	13301.4	35240.3	6.7941	0.0178518	*	0.138489	Group:Channel	0.019381	0.0076303	*	Group:Channel	0.57762	0.174696		0.801611	0.149484
Treatment	1	18	7082.78	24674.2	5.16694	0.0355065	*	0.078848	Treatment:Channel	0.00727603	0.000175746	*	Treatment:Channel	0.517369	0.508738		0.691146	0.535599
Channel	8	144	1035.65	11858.7	1.57198	0.138118		0.0123613	Group:Treatment:Channel	0.00727603	0.000175746	*	Group:Treatment:Channel	0.517369	0.0920422		0.691146	0.0697324
Group:Treatment	1	18	5191.58	24674.2	3.7873	0.067426		0.0590375	Channel	0.019381	0.0076303	*	Channel	0.57762	0.181585		0.801611	0.156875
Group:Channel	8	144	1052.14	11858.7	1.597	0.130546		0.0125557	Group:Channel	0.019381	0.0076303	*	Group:Channel	0.57762	0.174696		0.801611	0.149484
Treatment:Channel	8	144	510.797	10972.3	0.837958	0.570691		0.00613523	Treatment:Channel	0.00727603	0.000175746	*	Treatment:Channel	0.517369	0.508738		0.691146	0.535599
Group:Treatment:Channel	8	144	1257.19	10972.3	2.06242	0.0432288	*	0.0149661	Group:Treatment:Channel	0.00727603	0.000175746	*	Group:Treatment:Channel	0.517369	0.0920422		0.691146	0.0697324

## Sheet: AmplP2N2_rmANOVA
ANOVA.Effect	ANOVA.DFn	ANOVA.DFd	ANOVA.SSn	ANOVA.SSd	ANOVA.F	ANOVA.p	ANOVA.p..05	ANOVA.ges	Mauchly_Test.Effect	Mauchly_Test.W	Mauchly_Test.p	Mauchly_Test.p..05	Sphericity_Corrections.Effect	Sphericity_Corrections.GGe	Sphericity_Corrections.p.GG.	Sphericity_Corrections.p.GG...05	Sphericity_Corrections.HFe	Sphericity_Corrections.p.HF.	Sphericity_Corrections.p.HF...05
(Intercept)	1	18	16706.6	3764.7	79.8784	4.88539e-08	*	0.599734	Channel	0.0760604	0.321498		Channel	0.672186	0.0987584		0.992	0.0671957
Group	1	18	730.598	3764.7	3.49318	0.0779833		0.0614947	Group:Channel	0.0760604	0.321498		Group:Channel	0.672186	0.00807802	*	0.992	0.00212178	*
Treatment	1	18	187.194	4504.25	0.74807	0.398469		0.0165114	Treatment:Channel	0.0288324	0.0281353	*	Treatment:Channel	0.658777	0.162771		0.963626	0.131381
Channel	8	144	147.273	1406.07	1.88534	0.0665641		0.0130361	Group:Treatment:Channel	0.0288324	0.0281353	*	Group:Treatment:Channel	0.658777	0.505069		0.963626	0.5357
Group:Treatment	1	18	1181.49	4504.25	4.72149	0.0433845	*	0.0958101	Channel	0.0760604	0.321498		Channel	0.672186	0.0987584		0.992	0.0671957
Group:Channel	8	144	252.683	1406.07	3.23476	0.00205288	*	0.0221598	Group:Channel	0.0760604	0.321498		Group:Channel	0.672186	0.00807802	*	0.992	0.00212178	*
Treatment:Channel	8	144	131.548	1475.05	1.60528	0.128123		0.0116604	Treatment:Channel	0.0288324	0.0281353	*	Treatment:Channel	0.658777	0.162771		0.963626	0.131381
Group:Treatment:Channel	8	144	71.7504	1475.05	0.875569	0.538722		0.00639383	Group:Treatment:Channel	0.0288324	0.0281353	*	Group:Treatment:Channel	0.658777	0.505069		0.963626	0.5357

## Sheet: AmplN2P3_rmANOVA
ANOVA.Effect	ANOVA.DFn	ANOVA.DFd	ANOVA.SSn	ANOVA.SSd	ANOVA.F	ANOVA.p	ANOVA.p..05	ANOVA.ges	Mauchly_Test.Effect	Mauchly_Test.W	Mauchly_Test.p	Mauchly_Test.p..05	Sphericity_Corrections.Effect	Sphericity_Corrections.GGe	Sphericity_Corrections.p.GG.	Sphericity_Corrections.p.GG...05	Sphericity_Corrections.HFe	Sphericity_Corrections.p.HF.	Sphericity_Corrections.p.HF...05
(Intercept)	1	18	222303	10352.4	386.524	1.29452e-13	*	0.796282	Channel	0.00663205	0.000118958	*	Channel	0.545415	0.0400955	*	0.741595	0.0236954	*
Group	1	18	2162.22	10352.4	3.75951	0.0683491		0.0366259	Group:Channel	0.00663205	0.000118958	*	Group:Channel	0.545415	0.403452		0.741595	0.412874
Treatment	1	18	11413.9	25848.9	7.94814	0.0113581	*	0.167147	Treatment:Channel	0.00427924	1.76071e-05	*	Treatment:Channel	0.525193	0.404639		0.705054	0.41439
Channel	8	144	1174.72	8244.24	2.56481	0.0120689	*	0.0202371	Group:Treatment:Channel	0.00427924	1.76071e-05	*	Group:Treatment:Channel	0.525193	0.688464		0.705054	0.737672
Group:Treatment	1	18	285.945	25848.9	0.199119	0.660754		0.00500263	Channel	0.00663205	0.000118958	*	Channel	0.545415	0.0400955	*	0.741595	0.0236954	*
Group:Channel	8	144	469.4	8244.24	1.02486	0.42007		0.00818591	Group:Channel	0.00663205	0.000118958	*	Group:Channel	0.545415	0.403452		0.741595	0.412874
Treatment:Channel	8	144	704.319	12427.4	1.02014	0.423578		0.0122326	Treatment:Channel	0.00427924	1.76071e-05	*	Treatment:Channel	0.525193	0.404639		0.705054	0.41439
Group:Treatment:Channel	8	144	398.312	12427.4	0.576917	0.795598		0.00695482	Group:Treatment:Channel	0.00427924	1.76071e-05	*	Group:Treatment:Channel	0.525193	0.688464		0.705054	0.737672

## Sheet: dB_deltaPower_rmANOVA
ANOVA.Effect	ANOVA.DFn	ANOVA.DFd	ANOVA.SSn	ANOVA.SSd	ANOVA.F	ANOVA.p	ANOVA.p..05	ANOVA.ges	Mauchly_Test.Effect	Mauchly_Test.W	Mauchly_Test.p	Mauchly_Test.p..05	Sphericity_Corrections.Effect	Sphericity_Corrections.GGe	Sphericity_Corrections.p.GG.	Sphericity_Corrections.p.GG...05	Sphericity_Corrections.HFe	Sphericity_Corrections.p.HF.	Sphericity_Corrections.p.HF...05
(Intercept)	1	18	196731	1578.1	2243.94	2.38214e-20	*	0.968738	Channel	0.0527076	0.147718		Channel	0.646519	0.000255917	*	0.938104	1.81557e-05	*
Group	1	18	1929.6	1578.1	22.0092	0.000181848	*	0.233092	Group:Channel	0.0527076	0.147718		Group:Channel	0.646519	0.363983		0.938104	0.364136
Treatment	1	18	1596.48	2068.49	13.8926	0.00154206	*	0.200937	Treatment:Channel	0.0138659	0.00227787	*	Treatment:Channel	0.505014	0.446754		0.669436	0.463454
Channel	8	144	327.908	1136.7	5.19252	1.0405e-05	*	0.049113	Group:Treatment:Channel	0.0138659	0.00227787	*	Group:Treatment:Channel	0.505014	0.57429		0.669436	0.610073
Group:Treatment	1	18	322.15	2068.49	2.80335	0.111354		0.0482923	Channel	0.0527076	0.147718		Channel	0.646519	0.000255917	*	0.938104	1.81557e-05	*
Group:Channel	8	144	69.7421	1136.7	1.10439	0.363699		0.0108659	Group:Channel	0.0527076	0.147718		Group:Channel	0.646519	0.363983		0.938104	0.364136
Treatment:Channel	8	144	81.7073	1565.39	0.939528	0.486069		0.0127064	Treatment:Channel	0.0138659	0.00227787	*	Treatment:Channel	0.505014	0.446754		0.669436	0.463454
Group:Treatment:Channel	8	144	63.6652	1565.39	0.732067	0.663012		0.00992853	Group:Treatment:Channel	0.0138659	0.00227787	*	Group:Treatment:Channel	0.505014	0.57429		0.669436	0.610073

[truncated: 14 more sheets: dB_thetaPower_rmANOVA, dB_alphaPower_rmANOVA, dB_betaPower_rmANOVA, dB_gammaPower_rmANOVA, Time_deltaPower_rmANOVA, Freq_deltaPower_rmANOVA, Time_thetaPower_rmANOVA, Freq_thetaPower_rmANOVA, Time_alphaPower_rmANOVA, Freq_alphaPower_rmANOVA, Time_betaPower_rmANOVA, Freq_betaPower_rmANOVA, Time_gammaPower_rmANOVA, Freq_gammaPower_rmANOVA]
