# Supplementary material for: Chronic alcohol-induced brain states limit propagation of direct cortical stimulation
Source: Sci Rep. 2025 Oct 10;15:35407. doi: 10.1038/s41598-025-21802-z (PMC12514308; doi:10.1038/s41598-025-21802-z)
Supplement: Supplementary file 3 — Supplementary Material 3 [file 41598_2025_21802_MOESM3_ESM.xlsx]

## Sheet: rmMANOVA_all
Wald-Type Statistic (WTS):						with iter = 100
Test statistic df p-value
Group "1104.99" "27" "<0.001"
Treatment "385.301" "27" "<0.001"
Group:Treatment "298.563" "27" "<0.001"
Channel "905.44" "216" "<0.001"
Group:Channel "952.336" "216" "<0.001"
Treatment:Channel "774.926" "216" "<0.001"
Group:Treatment:Channel "833.603" "216" "<0.001"
modified ANOVA-Type Statistic (MATS):
Test statistic
Group 1218.940
Treatment 919.359
Group:Treatment 468.095
Channel 243.696
Group:Channel 180.010
Treatment:Channel 168.797
Group:Treatment:Channel 169.250
p-values resampling:
paramBS (WTS) paramBS (MATS)
Group "<0.001" "<0.001"
Treatment "<0.001" "<0.001"
Group:Treatment "<0.001" "<0.001"
Channel "0.39" "0.43"
Group:Channel "0.3" "0.88"
Treatment:Channel "0.65" "0.92"
Group:Treatment:Channel "0.64" "0.94"

## Sheet: rmMANOVA_Control
Wald-Type Statistic (WTS):					with iter = 100
Test statistic df p-value
Treatment "461.104" "26" "<0.001"
Channel "3416.369" "208" "<0.001"
Treatment:Channel "6250.81" "208" "<0.001"
modified ANOVA-Type Statistic (MATS):
Test statistic
Treatment 1176.962
Channel 251.184
Treatment:Channel 235.672
p-values resampling:
paramBS (WTS) paramBS (MATS)
Treatment "<0.001" "<0.001"
Channel "0.22" "0.38"
Treatment:Channel "0.1" "0.52"

## Sheet: rmMANOVA_Alc
Wald-Type Statistic (WTS):					with iter = 100
Test statistic df p-value
Treatment "239.405" "26" "<0.001"
Channel "10487.456" "208" "<0.001"
Treatment:Channel "5382.111" "208" "<0.001"
modified ANOVA-Type Statistic (MATS):
Test statistic
Treatment 208.991
Channel 229.336
Treatment:Channel 178.417
p-values resampling:
paramBS (WTS) paramBS (MATS)
Treatment "<0.001" "<0.001"
Channel "0.04" "0.38"
Treatment:Channel "0.13" "0.88"
