# Supplementary material for: Chronic alcohol-induced brain states limit propagation of direct cortical stimulation
Source: Sci Rep. 2025 Oct 10;15:35407. doi: 10.1038/s41598-025-21802-z (PMC12514308; doi:10.1038/s41598-025-21802-z)
Supplement: Supplementary file 4 — Supplementary Material 4 [file 41598_2025_21802_MOESM4_ESM.xlsx]

## Sheet: LatP1_rmANOVA_Control
ANOVA.Effect	ANOVA.DFn	ANOVA.DFd	ANOVA.SSn	ANOVA.SSd	ANOVA.F	ANOVA.p	ANOVA.p..05	ANOVA.ges	Mauchly_Test.Effect	Mauchly_Test.W	Mauchly_Test.p	Mauchly_Test.p..05	Sphericity_Corrections.Effect	Sphericity_Corrections.GGe	Sphericity_Corrections.p.GG.	Sphericity_Corrections.p.GG...05	Sphericity_Corrections.HFe	Sphericity_Corrections.p.HF.	Sphericity_Corrections.p.HF...05
(Intercept)	1	9	567159	1458.63	3499.48	5.67928e-13	*	0.993565	Channel	1.13143e-05	0.0016321	*	Channel	0.296957	0.336489		0.410542	0.340114
Treatment	1	9	325.685	1194.12	2.45466	0.151619		0.0814474	Treatment:Channel	2.30431e-07	1.97816e-06	*	Treatment:Channel	0.257053	0.406555		0.334198	0.422908
Channel	8	72	72.3475	556.587	1.16986	0.329186		0.0193165	Channel	1.13143e-05	0.0016321	*	Channel	0.296957	0.336489		0.410542	0.340114
Treatment:Channel	8	72	49.0228	463.69	0.951507	0.480508		0.0131709	Treatment:Channel	2.30431e-07	1.97816e-06	*	Treatment:Channel	0.257053	0.406555		0.334198	0.422908

## Sheet: LatN1_rmANOVA_Control
ANOVA.Effect	ANOVA.DFn	ANOVA.DFd	ANOVA.SSn	ANOVA.SSd	ANOVA.F	ANOVA.p	ANOVA.p..05	ANOVA.ges	Mauchly_Test.Effect	Mauchly_Test.W	Mauchly_Test.p	Mauchly_Test.p..05	Sphericity_Corrections.Effect	Sphericity_Corrections.GGe	Sphericity_Corrections.p.GG.	Sphericity_Corrections.p.GG...05	Sphericity_Corrections.HFe	Sphericity_Corrections.p.HF.	Sphericity_Corrections.p.HF...05
(Intercept)	1	9	1.50085e+06	4184.26	3228.21	8.15822e-13	*	0.989882	Channel	1.40288e-07	7.66521e-07	*	Channel	0.410368	0.205579		0.674068	0.171339
Treatment	1	9	3073.3	6203.76	4.45853	0.0639115		0.166899	Treatment:Channel	6.92077e-07	1.51464e-05	*	Treatment:Channel	0.395732	0.138968		0.635453	0.100808
Channel	8	72	502.128	2809.48	1.60854	0.137473		0.0316942	Channel	1.40288e-07	7.66521e-07	*	Channel	0.410368	0.205579		0.674068	0.171339
Treatment:Channel	8	72	468.1	2143.28	1.96563	0.0631679		0.02961	Treatment:Channel	6.92077e-07	1.51464e-05	*	Treatment:Channel	0.395732	0.138968		0.635453	0.100808

## Sheet: LatP2_rmANOVA_Control
ANOVA.Effect	ANOVA.DFn	ANOVA.DFd	ANOVA.SSn	ANOVA.SSd	ANOVA.F	ANOVA.p	ANOVA.p..05	ANOVA.ges	Mauchly_Test.Effect	Mauchly_Test.W	Mauchly_Test.p	Mauchly_Test.p..05	Sphericity_Corrections.Effect	Sphericity_Corrections.GGe	Sphericity_Corrections.p.GG.	Sphericity_Corrections.p.GG...05	Sphericity_Corrections.HFe	Sphericity_Corrections.p.HF.	Sphericity_Corrections.p.HF...05
(Intercept)	1	9	3.28554e+06	17017.4	1737.63	1.31186e-11	*	0.970069	Channel	6.35973e-06	0.000664942	*	Channel	0.444966	0.0922462		0.771958	0.0501587
Treatment	1	9	8933.15	64200.7	1.2523	0.292091		0.0809837	Treatment:Channel	3.50491e-07	4.3469e-06	*	Treatment:Channel	0.360385	0.525189		0.548291	0.572438
Channel	8	72	2113.46	8460.67	2.24819	0.0333451	*	0.0204223	Channel	6.35973e-06	0.000664942	*	Channel	0.444966	0.0922462		0.771958	0.0501587
Treatment:Channel	8	72	980.011	11696.1	0.754108	0.643816		0.00957464	Treatment:Channel	3.50491e-07	4.3469e-06	*	Treatment:Channel	0.360385	0.525189		0.548291	0.572438

## Sheet: LatN2_rmANOVA_Control
ANOVA.Effect	ANOVA.DFn	ANOVA.DFd	ANOVA.SSn	ANOVA.SSd	ANOVA.F	ANOVA.p	ANOVA.p..05	ANOVA.ges	Mauchly_Test.Effect	Mauchly_Test.W	Mauchly_Test.p	Mauchly_Test.p..05	Sphericity_Corrections.Effect	Sphericity_Corrections.GGe	Sphericity_Corrections.p.GG.	Sphericity_Corrections.p.GG...05	Sphericity_Corrections.HFe	Sphericity_Corrections.p.HF.	Sphericity_Corrections.p.HF...05
(Intercept)	1	9	4.26931e+06	32494.7	1182.46	7.34267e-11	*	0.966072	Channel	6.71725e-07	1.43505e-05	*	Channel	0.325988	0.259017		0.470875	0.245608
Treatment	1	9	20876.8	95244.1	1.97273	0.193717		0.12222	Treatment:Channel	2.00706e-08	1.60094e-08	*	Treatment:Channel	0.261454	0.508004		0.342272	0.540547
Channel	8	72	1321.19	8293.25	1.43378	0.197408		0.00873467	Channel	6.71725e-07	1.43505e-05	*	Channel	0.325988	0.259017		0.470875	0.245608
Treatment:Channel	8	72	1104.45	13904.3	0.71489	0.677599		0.00731226	Treatment:Channel	2.00706e-08	1.60094e-08	*	Treatment:Channel	0.261454	0.508004		0.342272	0.540547

## Sheet: LatP3_rmANOVA_Control
ANOVA.Effect	ANOVA.DFn	ANOVA.DFd	ANOVA.SSn	ANOVA.SSd	ANOVA.F	ANOVA.p	ANOVA.p..05	ANOVA.ges	Mauchly_Test.Effect	Mauchly_Test.W	Mauchly_Test.p	Mauchly_Test.p..05	Sphericity_Corrections.Effect	Sphericity_Corrections.GGe	Sphericity_Corrections.p.GG.	Sphericity_Corrections.p.GG...05	Sphericity_Corrections.HFe	Sphericity_Corrections.p.HF.	Sphericity_Corrections.p.HF...05
(Intercept)	1	9	1.86973e+07	192912	872.291	2.85533e-10	*	0.948213	Channel	0.00351251	0.64975		Channel	0.54623	0.0858813		1.12573	0.0405066	*
Treatment	1	9	78385.6	516121	1.36687	0.272382		0.0712888	Treatment:Channel	0.000228308	0.0831091		Treatment:Channel	0.405743	0.531711		0.661696	0.585741
Channel	8	72	23744.3	98804.9	2.16284	0.0405066	*	0.0227238	Channel	0.00351251	0.64975		Channel	0.54623	0.0858813		1.12573	0.0405066	*
Treatment:Channel	8	72	18151.6	213326	0.765796	0.633767		0.0174649	Treatment:Channel	0.000228308	0.0831091		Treatment:Channel	0.405743	0.531711		0.661696	0.585741

## Sheet: AmplP1N1_rmANOVA_Control
ANOVA.Effect	ANOVA.DFn	ANOVA.DFd	ANOVA.SSn	ANOVA.SSd	ANOVA.F	ANOVA.p	ANOVA.p..05	ANOVA.ges	Mauchly_Test.Effect	Mauchly_Test.W	Mauchly_Test.p	Mauchly_Test.p..05	Sphericity_Corrections.Effect	Sphericity_Corrections.GGe	Sphericity_Corrections.p.GG.	Sphericity_Corrections.p.GG...05	Sphericity_Corrections.HFe	Sphericity_Corrections.p.HF.	Sphericity_Corrections.p.HF...05
(Intercept)	1	9	450181	23923.5	169.358	3.8479e-07	*	0.839473	Channel	0.0025992	0.565783		Channel	0.448228	0.114394		0.781703	0.0691254
Treatment	1	9	63521.5	36855.6	15.5117	0.00341376	*	0.424591	Treatment:Channel	6.20113e-05	0.0179797	*	Treatment:Channel	0.326125	0.570582		0.47117	0.622323
Channel	8	72	2473.01	10769.6	2.06666	0.0503584		0.0279254	Channel	0.0025992	0.565783		Channel	0.448228	0.114394		0.781703	0.0691254
Treatment:Channel	8	72	1049.26	14536.2	0.649644	0.733421		0.0120419	Treatment:Channel	6.20113e-05	0.0179797	*	Treatment:Channel	0.326125	0.570582		0.47117	0.622323

## Sheet: AmplN1P2_rmANOVA_Control
ANOVA.Effect	ANOVA.DFn	ANOVA.DFd	ANOVA.SSn	ANOVA.SSd	ANOVA.F	ANOVA.p	ANOVA.p..05	ANOVA.ges	Mauchly_Test.Effect	Mauchly_Test.W	Mauchly_Test.p	Mauchly_Test.p..05	Sphericity_Corrections.Effect	Sphericity_Corrections.GGe	Sphericity_Corrections.p.GG.	Sphericity_Corrections.p.GG...05	Sphericity_Corrections.HFe	Sphericity_Corrections.p.HF.	Sphericity_Corrections.p.HF...05
(Intercept)	1	9	125615	32364	34.932	0.000226158	*	0.655116	Channel	0.00033058	0.12116		Channel	0.417289	0.276442		0.692885	0.255984
Treatment	1	9	12201.1	18955.4	5.79305	0.0394506	*	0.155763	Treatment:Channel	0.000118776	0.040052	*	Treatment:Channel	0.332238	0.322765		0.484443	0.321573
Channel	8	72	1209.29	8063.09	1.34981	0.233497		0.0179582	Channel	0.00033058	0.12116		Channel	0.417289	0.276442		0.692885	0.255984
Treatment:Channel	8	72	911.395	6747.42	1.21566	0.302347		0.0135945	Treatment:Channel	0.000118776	0.040052	*	Treatment:Channel	0.332238	0.322765		0.484443	0.321573

## Sheet: AmplP2N2_rmANOVA_Control
ANOVA.Effect	ANOVA.DFn	ANOVA.DFd	ANOVA.SSn	ANOVA.SSd	ANOVA.F	ANOVA.p	ANOVA.p..05	ANOVA.ges	Mauchly_Test.Effect	Mauchly_Test.W	Mauchly_Test.p	Mauchly_Test.p..05	Sphericity_Corrections.Effect	Sphericity_Corrections.GGe	Sphericity_Corrections.p.GG.	Sphericity_Corrections.p.GG...05	Sphericity_Corrections.HFe	Sphericity_Corrections.p.HF.	Sphericity_Corrections.p.HF...05
(Intercept)	1	9	5224.9	1449.23	32.4478	0.000295693	*	0.585309	Channel	0.000583985	0.204544		Channel	0.422534	0.0325757	*	0.70739	0.0109168	*
Treatment	1	9	214.056	1088.56	1.76978	0.216133		0.0546634	Treatment:Channel	0.000351678	0.128688		Treatment:Channel	0.532768	0.483385		1.07172	0.527998
Channel	8	72	182.285	513.331	3.19592	0.00368983	*	0.0469308	Channel	0.000583985	0.204544		Channel	0.422534	0.0325757	*	0.70739	0.0109168	*
Treatment:Channel	8	72	64.4753	650.726	0.891738	0.527998		0.0171189	Treatment:Channel	0.000351678	0.128688		Treatment:Channel	0.532768	0.483385		1.07172	0.527998

## Sheet: AmplN2P3_rmANOVA_Control
ANOVA.Effect	ANOVA.DFn	ANOVA.DFd	ANOVA.SSn	ANOVA.SSd	ANOVA.F	ANOVA.p	ANOVA.p..05	ANOVA.ges	Mauchly_Test.Effect	Mauchly_Test.W	Mauchly_Test.p	Mauchly_Test.p..05	Sphericity_Corrections.Effect	Sphericity_Corrections.GGe	Sphericity_Corrections.p.GG.	Sphericity_Corrections.p.GG...05	Sphericity_Corrections.HFe	Sphericity_Corrections.p.HF.	Sphericity_Corrections.p.HF...05
(Intercept)	1	9	134157	3174.67	380.326	1.13399e-08	*	0.851109	Channel	3.68362e-05	0.00901064	*	Channel	0.371201	0.0690283		0.574093	0.0394801	*
Treatment	1	9	7656.52	12481.6	5.52083	0.0433303	*	0.245988	Treatment:Channel	2.09159e-08	1.74193e-08	*	Treatment:Channel	0.333936	0.523012		0.488166	0.56679
Channel	8	72	728.098	2463.6	2.65988	0.0128873	*	0.0300902	Channel	3.68362e-05	0.00901064	*	Channel	0.371201	0.0690283		0.574093	0.0394801	*
Treatment:Channel	8	72	441.09	5349.26	0.742124	0.654134		0.0184478	Treatment:Channel	2.09159e-08	1.74193e-08	*	Treatment:Channel	0.333936	0.523012		0.488166	0.56679

## Sheet: dB_deltaPower_rmANOVA_Control
ANOVA.Effect	ANOVA.DFn	ANOVA.DFd	ANOVA.SSn	ANOVA.SSd	ANOVA.F	ANOVA.p	ANOVA.p..05	ANOVA.ges	Mauchly_Test.Effect	Mauchly_Test.W	Mauchly_Test.p	Mauchly_Test.p..05	Sphericity_Corrections.Effect	Sphericity_Corrections.GGe	Sphericity_Corrections.p.GG.	Sphericity_Corrections.p.GG...05	Sphericity_Corrections.HFe	Sphericity_Corrections.p.HF.	Sphericity_Corrections.p.HF...05
(Intercept)	1	9	118814	779.19	1372.35	3.77275e-11	*	0.979335	Channel	0.00148318	0.411435		Channel	0.496733	0.0136253	*	0.938561	0.00168108	*
Treatment	1	9	1676.47	726.752	20.7611	0.00137324	*	0.400726	Treatment:Channel	0.000518564	0.184426		Treatment:Channel	0.431768	0.701976		0.733462	0.793022
Channel	8	72	171.915	423.213	3.65592	0.00126487	*	0.0641706	Channel	0.00148318	0.411435		Channel	0.496733	0.0136253	*	0.938561	0.00168108	*
Treatment:Channel	8	72	32.867	577.955	0.511809	0.843753		0.0129399	Treatment:Channel	0.000518564	0.184426		Treatment:Channel	0.431768	0.701976		0.733462	0.793022

[truncated: 14 more sheets: dB_thetaPower_rmANOVA_Control, dB_alphaPower_rmANOVA_Control, dB_betaPower_rmANOVA_Control, dB_gammaPower_rmANOVA_Control, Time_deltaPower_rmANOVA_Control, Freq_deltaPower_rmANOVA_Control, Time_thetaPower_rmANOVA_Control, Freq_thetaPower_rmANOVA_Control, Time_alphaPower_rmANOVA_Control, Freq_alphaPower_rmANOVA_Control, Time_betaPower_rmANOVA_Control, Freq_betaPower_rmANOVA_Control, Time_gammaPower_rmANOVA_Control, Freq_gammaPower_rmANOVA_Control]
