# Supplementary material for: Chronic alcohol-induced brain states limit propagation of direct cortical stimulation
Source: Sci Rep. 2025 Oct 10;15:35407. doi: 10.1038/s41598-025-21802-z (PMC12514308; doi:10.1038/s41598-025-21802-z)
Supplement: Supplementary file 5 — Supplementary Material 5 [file 41598_2025_21802_MOESM5_ESM.xlsx]

## Sheet: LatP1_rmANOVA_Alc
ANOVA.Effect	ANOVA.DFn	ANOVA.DFd	ANOVA.SSn	ANOVA.SSd	ANOVA.F	ANOVA.p	ANOVA.p..05	ANOVA.ges	Mauchly_Test.Effect	Mauchly_Test.W	Mauchly_Test.p	Mauchly_Test.p..05	Sphericity_Corrections.Effect	Sphericity_Corrections.GGe	Sphericity_Corrections.p.GG.	Sphericity_Corrections.p.GG...05	Sphericity_Corrections.HFe	Sphericity_Corrections.p.HF.	Sphericity_Corrections.p.HF...05
(Intercept)	1	9	549759	3166.85	1562.38	2.11165e-11	*	0.988136	Channel	3.17133e-10	2.1743e-12	*	Channel	0.272642	0.424129		0.363172	0.444036
Treatment	1	9	147.08	1601.02	0.826796	0.386903		0.0217969	Treatment:Channel	6.85876e-09	1.72383e-09	*	Treatment:Channel	0.294679	0.282522		0.405985	0.276415
Channel	8	72	96.0516	943.45	0.91628	0.508233		0.0143431	Channel	3.17133e-10	2.1743e-12	*	Channel	0.272642	0.424129		0.363172	0.444036
Treatment:Channel	8	72	133.624	889.337	1.35226	0.232368		0.0198424	Treatment:Channel	6.85876e-09	1.72383e-09	*	Treatment:Channel	0.294679	0.282522		0.405985	0.276415

## Sheet: LatN1_rmANOVA_Alc
ANOVA.Effect	ANOVA.DFn	ANOVA.DFd	ANOVA.SSn	ANOVA.SSd	ANOVA.F	ANOVA.p	ANOVA.p..05	ANOVA.ges	Mauchly_Test.Effect	Mauchly_Test.W	Mauchly_Test.p	Mauchly_Test.p..05	Sphericity_Corrections.Effect	Sphericity_Corrections.GGe	Sphericity_Corrections.p.GG.	Sphericity_Corrections.p.GG...05	Sphericity_Corrections.HFe	Sphericity_Corrections.p.HF.	Sphericity_Corrections.p.HF...05
(Intercept)	1	9	1.12408e+06	7423.34	1362.82	3.89226e-11	*	0.978978	Channel	5.19304e-06	0.000480461	*	Channel	0.231349	0.26478		0.288633	0.261396
Treatment	1	9	34.2087	8985.63	0.0342634	0.857252		0.00141519	Treatment:Channel	1.65266e-06	7.0673e-05	*	Treatment:Channel	0.233515	0.64618		0.292371	0.688648
Channel	8	72	629.854	3947.77	1.43592	0.196553		0.0254301	Channel	5.19304e-06	0.000480461	*	Channel	0.231349	0.26478		0.288633	0.261396
Treatment:Channel	8	72	179.302	3781.49	0.426743	0.901323		0.00737338	Treatment:Channel	1.65266e-06	7.0673e-05	*	Treatment:Channel	0.233515	0.64618		0.292371	0.688648

## Sheet: LatP2_rmANOVA_Alc
ANOVA.Effect	ANOVA.DFn	ANOVA.DFd	ANOVA.SSn	ANOVA.SSd	ANOVA.F	ANOVA.p	ANOVA.p..05	ANOVA.ges	Mauchly_Test.Effect	Mauchly_Test.W	Mauchly_Test.p	Mauchly_Test.p..05	Sphericity_Corrections.Effect	Sphericity_Corrections.GGe	Sphericity_Corrections.p.GG.	Sphericity_Corrections.p.GG...05	Sphericity_Corrections.HFe	Sphericity_Corrections.p.HF.	Sphericity_Corrections.p.HF...05
(Intercept)	1	9	2.22789e+06	72005	278.467	4.45516e-08	*	0.937029	Channel	1.5489e-06	6.31599e-05	*	Channel	0.358158	0.11147		0.543068	0.0789199
Treatment	1	9	4957.47	70726.8	0.630839	0.447484		0.0320502	Treatment:Channel	0.000107542	0.0356012	*	Treatment:Channel	0.377761	0.0889599		0.590106	0.0555756
Channel	8	72	895.781	3620.55	2.22674	0.0350195	*	0.00594742	Channel	1.5489e-06	6.31599e-05	*	Channel	0.358158	0.11147		0.543068	0.0789199
Treatment:Channel	8	72	899.427	3368.69	2.40297	0.0233706	*	0.00597148	Treatment:Channel	0.000107542	0.0356012	*	Treatment:Channel	0.377761	0.0889599		0.590106	0.0555756

## Sheet: LatN2_rmANOVA_Alc
ANOVA.Effect	ANOVA.DFn	ANOVA.DFd	ANOVA.SSn	ANOVA.SSd	ANOVA.F	ANOVA.p	ANOVA.p..05	ANOVA.ges	Mauchly_Test.Effect	Mauchly_Test.W	Mauchly_Test.p	Mauchly_Test.p..05	Sphericity_Corrections.Effect	Sphericity_Corrections.GGe	Sphericity_Corrections.p.GG.	Sphericity_Corrections.p.GG...05	Sphericity_Corrections.HFe	Sphericity_Corrections.p.HF.	Sphericity_Corrections.p.HF...05
(Intercept)	1	9	3.8235e+06	151437	227.233	1.08075e-07	*	0.904025	Channel	1.28818e-07	6.50135e-07	*	Channel	0.289126	0.427826		0.394985	0.449098
Treatment	1	9	73301.7	221552	2.9777	0.1185		0.152961	Treatment:Channel	2.12286e-08	1.7956e-08	*	Treatment:Channel	0.267567	0.159293		0.353624	0.140852
Channel	8	72	2036.2	19975.1	0.917429	0.507317		0.00499125	Channel	1.28818e-07	6.50135e-07	*	Channel	0.289126	0.427826		0.394985	0.449098
Treatment:Channel	8	72	2889.44	12952.2	2.00777	0.0574874		0.00706798	Treatment:Channel	2.12286e-08	1.7956e-08	*	Treatment:Channel	0.267567	0.159293		0.353624	0.140852

## Sheet: LatP3_rmANOVA_Alc
ANOVA.Effect	ANOVA.DFn	ANOVA.DFd	ANOVA.SSn	ANOVA.SSd	ANOVA.F	ANOVA.p	ANOVA.p..05	ANOVA.ges	Mauchly_Test.Effect	Mauchly_Test.W	Mauchly_Test.p	Mauchly_Test.p..05	Sphericity_Corrections.Effect	Sphericity_Corrections.GGe	Sphericity_Corrections.p.GG.	Sphericity_Corrections.p.GG...05	Sphericity_Corrections.HFe	Sphericity_Corrections.p.HF.	Sphericity_Corrections.p.HF...05
(Intercept)	1	9	1.56474e+07	323438	435.406	6.24437e-09	*	0.906724	Channel	2.41259e-05	0.00499066	*	Channel	0.341161	0.217091		0.504186	0.194761
Treatment	1	9	18083.8	788343	0.206452	0.660323		0.0111096	Treatment:Channel	2.75001e-05	0.00600764	*	Treatment:Channel	0.449108	0.207431		0.784348	0.167283
Channel	8	72	52785.2	296814	1.60055	0.13981		0.0317512	Channel	2.41259e-05	0.00499066	*	Channel	0.341161	0.217091		0.504186	0.194761
Treatment:Channel	8	72	35289.7	201083	1.57948	0.146147		0.0214532	Treatment:Channel	2.75001e-05	0.00600764	*	Treatment:Channel	0.449108	0.207431		0.784348	0.167283

## Sheet: AmplP1N1_rmANOVA_Alc
ANOVA.Effect	ANOVA.DFn	ANOVA.DFd	ANOVA.SSn	ANOVA.SSd	ANOVA.F	ANOVA.p	ANOVA.p..05	ANOVA.ges	Mauchly_Test.Effect	Mauchly_Test.W	Mauchly_Test.p	Mauchly_Test.p..05	Sphericity_Corrections.Effect	Sphericity_Corrections.GGe	Sphericity_Corrections.p.GG.	Sphericity_Corrections.p.GG...05	Sphericity_Corrections.HFe	Sphericity_Corrections.p.HF.	Sphericity_Corrections.p.HF...05
(Intercept)	1	9	128897	16091.2	72.0933	1.3714e-05	*	0.667841	Channel	6.79461e-05	0.0202086	*	Channel	0.39167	0.0536338		0.62501	0.025917	*
Treatment	1	9	6912.56	22597.9	2.75305	0.131442		0.0973312	Treatment:Channel	6.77729e-07	1.45834e-05	*	Treatment:Channel	0.308446	0.119553		0.433906	0.0937154
Channel	8	72	3366.08	10663.6	2.84096	0.00845157	*	0.0498867	Channel	6.79461e-05	0.0202086	*	Channel	0.39167	0.0536338		0.62501	0.025917	*
Treatment:Channel	8	72	3693.4	14755.8	2.25272	0.0330016	*	0.0544735	Treatment:Channel	6.77729e-07	1.45834e-05	*	Treatment:Channel	0.308446	0.119553		0.433906	0.0937154

## Sheet: AmplN1P2_rmANOVA_Alc
ANOVA.Effect	ANOVA.DFn	ANOVA.DFd	ANOVA.SSn	ANOVA.SSd	ANOVA.F	ANOVA.p	ANOVA.p..05	ANOVA.ges	Mauchly_Test.Effect	Mauchly_Test.W	Mauchly_Test.p	Mauchly_Test.p..05	Sphericity_Corrections.Effect	Sphericity_Corrections.GGe	Sphericity_Corrections.p.GG.	Sphericity_Corrections.p.GG...05	Sphericity_Corrections.HFe	Sphericity_Corrections.p.HF.	Sphericity_Corrections.p.HF...05
(Intercept)	1	9	36602.9	2876.3	114.531	2.02884e-06	*	0.687785	Channel	1.46571e-05	0.0024116	*	Channel	0.319474	0.137604		0.45696	0.110592
Treatment	1	9	73.2851	5718.76	0.115334	0.741942		0.00439125	Treatment:Channel	3.83155e-06	0.000292608	*	Treatment:Channel	0.304372	0.17951		0.425546	0.157608
Channel	8	72	878.493	3795.64	2.08303	0.0485331	*	0.0502165	Channel	1.46571e-05	0.0024116	*	Channel	0.319474	0.137604		0.45696	0.110592
Treatment:Channel	8	72	856.595	4224.89	1.82475	0.0862757		0.0490262	Treatment:Channel	3.83155e-06	0.000292608	*	Treatment:Channel	0.304372	0.17951		0.425546	0.157608

## Sheet: AmplP2N2_rmANOVA_Alc
ANOVA.Effect	ANOVA.DFn	ANOVA.DFd	ANOVA.SSn	ANOVA.SSd	ANOVA.F	ANOVA.p	ANOVA.p..05	ANOVA.ges	Mauchly_Test.Effect	Mauchly_Test.W	Mauchly_Test.p	Mauchly_Test.p..05	Sphericity_Corrections.Effect	Sphericity_Corrections.GGe	Sphericity_Corrections.p.GG.	Sphericity_Corrections.p.GG...05	Sphericity_Corrections.HFe	Sphericity_Corrections.p.HF.	Sphericity_Corrections.p.HF...05
(Intercept)	1	9	12212.3	2315.47	47.4677	7.14879e-05	*	0.621158	Channel	0.000811141	0.267867		Channel	0.542188	0.0827227		1.10925	0.037698	*
Treatment	1	9	1154.62	3415.69	3.04232	0.115084		0.134214	Treatment:Channel	0.000273267	0.100149		Treatment:Channel	0.488686	0.219558		0.910885	0.174959
Channel	8	72	217.671	892.736	2.19442	0.037698	*	0.0283948	Channel	0.000811141	0.267867		Channel	0.542188	0.0827227		1.10925	0.037698	*
Treatment:Channel	8	72	138.824	824.322	1.51568	0.166933		0.0182975	Treatment:Channel	0.000273267	0.100149		Treatment:Channel	0.488686	0.219558		0.910885	0.174959

## Sheet: AmplN2P3_rmANOVA_Alc
ANOVA.Effect	ANOVA.DFn	ANOVA.DFd	ANOVA.SSn	ANOVA.SSd	ANOVA.F	ANOVA.p	ANOVA.p..05	ANOVA.ges	Mauchly_Test.Effect	Mauchly_Test.W	Mauchly_Test.p	Mauchly_Test.p..05	Sphericity_Corrections.Effect	Sphericity_Corrections.GGe	Sphericity_Corrections.p.GG.	Sphericity_Corrections.p.GG...05	Sphericity_Corrections.HFe	Sphericity_Corrections.p.HF.	Sphericity_Corrections.p.HF...05
(Intercept)	1	9	90308.3	7177.73	113.236	2.12811e-06	*	0.729987	Channel	8.56962e-07	2.22433e-05	*	Channel	0.380469	0.256363		0.596801	0.235917
Treatment	1	9	4043.35	13367.3	2.72232	0.133352		0.107975	Treatment:Channel	2.09488e-05	0.00407497	*	Treatment:Channel	0.362207	0.480251		0.552587	0.516991
Channel	8	72	916.018	5780.64	1.42617	0.20047		0.0266906	Channel	8.56962e-07	2.22433e-05	*	Channel	0.380469	0.256363		0.596801	0.235917
Treatment:Channel	8	72	661.541	7078.19	0.841157	0.569739		0.0194197	Treatment:Channel	2.09488e-05	0.00407497	*	Treatment:Channel	0.362207	0.480251		0.552587	0.516991

## Sheet: dB_deltaPower_rmANOVA_Alc
ANOVA.Effect	ANOVA.DFn	ANOVA.DFd	ANOVA.SSn	ANOVA.SSd	ANOVA.F	ANOVA.p	ANOVA.p..05	ANOVA.ges	Mauchly_Test.Effect	Mauchly_Test.W	Mauchly_Test.p	Mauchly_Test.p..05	Sphericity_Corrections.Effect	Sphericity_Corrections.GGe	Sphericity_Corrections.p.GG.	Sphericity_Corrections.p.GG...05	Sphericity_Corrections.HFe	Sphericity_Corrections.p.HF.	Sphericity_Corrections.p.HF...05
(Intercept)	1	9	79846.7	798.912	899.499	2.48988e-10	*	0.954097	Channel	2.90692e-05	0.00649434	*	Channel	0.421435	0.0484406	*	0.704331	0.0201361	*
Treatment	1	9	242.164	1341.73	1.62437	0.234405		0.0592996	Treatment:Channel	2.73119e-08	2.99998e-08	*	Treatment:Channel	0.347107	0.393749		0.517596	0.408506
Channel	8	72	225.735	713.486	2.84745	0.00832457	*	0.0554999	Channel	2.90692e-05	0.00649434	*	Channel	0.421435	0.0484406	*	0.704331	0.0201361	*
Treatment:Channel	8	72	112.505	987.438	1.02543	0.425114		0.028453	Treatment:Channel	2.73119e-08	2.99998e-08	*	Treatment:Channel	0.347107	0.393749		0.517596	0.408506

[truncated: 14 more sheets: dB_thetaPower_rmANOVA_Alc, dB_alphaPower_rmANOVA_Alc, dB_betaPower_rmANOVA_Alc, dB_gammaPower_rmANOVA_Alc, Time_deltaPower_rmANOVA_Alc, Freq_deltaPower_rmANOVA_Alc, Time_thetaPower_rmANOVA_Alc, Freq_thetaPower_rmANOVA_Alc, Time_alphaPower_rmANOVA_Alc, Freq_alphaPower_rmANOVA_Alc, Time_betaPower_rmANOVA_Alc, Freq_betaPower_rmANOVA_Alc, Time_gammaPower_rmANOVA_Alc, Freq_gammaPower_rmANOVA_Alc]
