# Supplementary material for: Chronic alcohol-induced brain states limit propagation of direct cortical stimulation
Source: Sci Rep. 2025 Oct 10;15:35407. doi: 10.1038/s41598-025-21802-z (PMC12514308; doi:10.1038/s41598-025-21802-z)
Supplement: Supplementary file 6 — Supplementary Material 6 [file 41598_2025_21802_MOESM6_ESM.xlsx]

## Sheet: LatP1_All_Channels
.y.	group1	group2	n1	n2	statistic	df	p	p.adj	p.adj.signif
LatP1	PR	MR	10	10	0.294526	9	0.775	0.845	ns
LatP1	PR	FR	10	10	-2.43979	9	0.037	0.492	ns
LatP1	PR	FC	10	10	-2.38346	9	0.041	0.492	ns
LatP1	PR	PC	10	10	-0.577504	9	0.578	0.718	ns
LatP1	PR	MC	10	10	0.353161	9	0.732	0.824	ns
LatP1	PR	FL	10	10	-1.59718	9	0.145	0.684	ns
LatP1	PR	ML	10	10	-0.540616	9	0.602	0.722	ns
LatP1	PR	PL	10	10	0.661095	9	0.525	0.718	ns
LatP1	MR	FR	10	10	-1.41681	9	0.19	0.684	ns
LatP1	MR	FC	10	10	-1.4344	9	0.185	0.684	ns
LatP1	MR	PC	10	10	-0.6013	9	0.562	0.718	ns
LatP1	MR	MC	10	10	0.0700672	9	0.946	0.984	ns
LatP1	MR	FL	10	10	-0.967483	9	0.359	0.718	ns
LatP1	MR	ML	10	10	-0.576727	9	0.578	0.718	ns
LatP1	MR	PL	10	10	0.420222	9	0.684	0.794	ns
LatP1	FR	FC	10	10	-0.866616	9	0.409	0.718	ns
LatP1	FR	PC	10	10	1.04034	9	0.325	0.718	ns
LatP1	FR	MC	10	10	1.27597	9	0.234	0.702	ns
LatP1	FR	FL	10	10	-0.0201768	9	0.984	0.984	ns
LatP1	FR	ML	10	10	0.869396	9	0.407	0.718	ns
LatP1	FR	PL	10	10	1.13488	9	0.286	0.718	ns
LatP1	FC	PC	10	10	1.52371	9	0.162	0.684	ns
LatP1	FC	MC	10	10	2.48145	9	0.035	0.492	ns
LatP1	FC	FL	10	10	1.68585	9	0.126	0.684	ns
LatP1	FC	ML	10	10	1.12182	9	0.291	0.718	ns
LatP1	FC	PL	10	10	1.48678	9	0.171	0.684	ns
LatP1	PC	MC	10	10	0.752968	9	0.471	0.718	ns
LatP1	PC	FL	10	10	-0.741481	9	0.477	0.718	ns
LatP1	PC	ML	10	10	0.0526519	9	0.959	0.984	ns
LatP1	PC	PL	10	10	0.868403	9	0.408	0.718	ns
LatP1	MC	FL	10	10	-2.1046	9	0.065	0.581	ns
LatP1	MC	ML	10	10	-0.654816	9	0.529	0.718	ns
LatP1	MC	PL	10	10	0.663301	9	0.524	0.718	ns
LatP1	FL	ML	10	10	0.729911	9	0.484	0.718	ns
LatP1	FL	PL	10	10	1.31534	9	0.221	0.702	ns
LatP1	ML	PL	10	10	1.03619	9	0.327	0.718	ns

## Sheet: LatP1_FC_vs_Others
.y.	group1	group2	n1	n2	statistic	df	p	p.adj	p.adj.signif
LatP1	PR	FC	10	10	-2.38346	9	0.041	0.164	ns
LatP1	MR	FC	10	10	-1.4344	9	0.185	0.247	ns
LatP1	FR	FC	10	10	-0.866616	9	0.409	0.409	ns
LatP1	FC	PC	10	10	1.52371	9	0.162	0.247	ns
LatP1	FC	MC	10	10	2.48145	9	0.035	0.164	ns
LatP1	FC	FL	10	10	1.68585	9	0.126	0.247	ns
LatP1	FC	ML	10	10	1.12182	9	0.291	0.333	ns
LatP1	FC	PL	10	10	1.48678	9	0.171	0.247	ns

## Sheet: LatN1_All_Channels
.y.	group1	group2	n1	n2	statistic	df	p	p.adj	p.adj.signif
LatN1	PR	MR	10	10	-0.280854	9	0.785	0.95	ns
LatN1	PR	FR	10	10	1.20411	9	0.259	0.717	ns
LatN1	PR	FC	10	10	-0.13421	9	0.896	0.95	ns
LatN1	PR	PC	10	10	0.245332	9	0.812	0.95	ns
LatN1	PR	MC	10	10	1.72137	9	0.119	0.432	ns
LatN1	PR	FL	10	10	-1.11294	9	0.295	0.759	ns
LatN1	PR	ML	10	10	-0.989923	9	0.348	0.835	ns
LatN1	PR	PL	10	10	0.198625	9	0.847	0.95	ns
LatN1	MR	FR	10	10	1.22337	9	0.252	0.717	ns
LatN1	MR	FC	10	10	0.0412597	9	0.968	0.992	ns
LatN1	MR	PC	10	10	0.347735	9	0.736	0.95	ns
LatN1	MR	MC	10	10	1.71559	9	0.12	0.432	ns
LatN1	MR	FL	10	10	-0.437521	9	0.672	0.95	ns
LatN1	MR	ML	10	10	-0.489685	9	0.636	0.95	ns
LatN1	MR	PL	10	10	0.273034	9	0.791	0.95	ns
LatN1	FR	FC	10	10	-1.88233	9	0.092	0.432	ns
LatN1	FR	PC	10	10	-1.72228	9	0.119	0.432	ns
LatN1	FR	MC	10	10	0.458102	9	0.658	0.95	ns
LatN1	FR	FL	10	10	-1.8057	9	0.104	0.432	ns
LatN1	FR	ML	10	10	-1.75968	9	0.112	0.432	ns
LatN1	FR	PL	10	10	-0.758227	9	0.468	0.936	ns
LatN1	FC	PC	10	10	0.312223	9	0.762	0.95	ns
LatN1	FC	MC	10	10	1.87312	9	0.094	0.432	ns
LatN1	FC	FL	10	10	-0.559057	9	0.59	0.95	ns
LatN1	FC	ML	10	10	-0.55628	9	0.592	0.95	ns
LatN1	FC	PL	10	10	0.207772	9	0.84	0.95	ns
LatN1	PC	MC	10	10	1.21801	9	0.254	0.717	ns
LatN1	PC	FL	10	10	-0.866725	9	0.409	0.866	ns
LatN1	PC	ML	10	10	-0.883989	9	0.4	0.866	ns
LatN1	PC	PL	10	10	-0.0098828	9	0.992	0.992	ns
LatN1	MC	FL	10	10	-1.79586	9	0.106	0.432	ns
LatN1	MC	ML	10	10	-1.96541	9	0.081	0.432	ns
LatN1	MC	PL	10	10	-2.02131	9	0.074	0.432	ns
LatN1	FL	ML	10	10	-0.133629	9	0.897	0.95	ns
LatN1	FL	PL	10	10	0.509814	9	0.622	0.95	ns
LatN1	ML	PL	10	10	0.601836	9	0.562	0.95	ns

## Sheet: LatN1_FC_vs_Others
.y.	group1	group2	n1	n2	statistic	df	p	p.adj	p.adj.signif
LatN1	PR	FC	10	10	-0.13421	9	0.896	0.968	ns
LatN1	MR	FC	10	10	0.0412597	9	0.968	0.968	ns
LatN1	FR	FC	10	10	-1.88233	9	0.092	0.375	ns
LatN1	FC	PC	10	10	0.312223	9	0.762	0.968	ns
LatN1	FC	MC	10	10	1.87312	9	0.094	0.375	ns
LatN1	FC	FL	10	10	-0.559057	9	0.59	0.968	ns
LatN1	FC	ML	10	10	-0.55628	9	0.592	0.968	ns
LatN1	FC	PL	10	10	0.207772	9	0.84	0.968	ns

## Sheet: LatP2_All_Channels
.y.	group1	group2	n1	n2	statistic	df	p	p.adj	p.adj.signif
LatP2	PR	MR	10	10	-0.890853	9	0.396	0.692	ns
LatP2	PR	FR	10	10	0.292183	9	0.777	0.851	ns
LatP2	PR	FC	10	10	-0.300505	9	0.771	0.851	ns
LatP2	PR	PC	10	10	1.16042	9	0.276	0.57	ns
LatP2	PR	MC	10	10	1.32184	9	0.219	0.554	ns
LatP2	PR	FL	10	10	-0.803907	9	0.442	0.692	ns
LatP2	PR	ML	10	10	0.832493	9	0.427	0.692	ns
LatP2	PR	PL	10	10	1.13759	9	0.285	0.57	ns
LatP2	MR	FR	10	10	1.15757	9	0.277	0.57	ns
LatP2	MR	FC	10	10	0.476542	9	0.645	0.801	ns
LatP2	MR	PC	10	10	1.53282	9	0.16	0.551	ns
LatP2	MR	MC	10	10	2.04465	9	0.071	0.551	ns
LatP2	MR	FL	10	10	0.547355	9	0.597	0.774	ns
LatP2	MR	ML	10	10	1.43783	9	0.184	0.551	ns
LatP2	MR	PL	10	10	1.76608	9	0.111	0.551	ns
LatP2	FR	FC	10	10	-0.814717	9	0.436	0.692	ns
LatP2	FR	PC	10	10	1.28331	9	0.231	0.554	ns
LatP2	FR	MC	10	10	0.64068	9	0.538	0.774	ns
LatP2	FR	FL	10	10	-0.569869	9	0.583	0.774	ns
LatP2	FR	ML	10	10	0.281243	9	0.785	0.851	ns
LatP2	FR	PL	10	10	0.541099	9	0.602	0.774	ns
LatP2	FC	PC	10	10	1.41292	9	0.191	0.551	ns
LatP2	FC	MC	10	10	1.94938	9	0.083	0.551	ns
LatP2	FC	FL	10	10	0.0259288	9	0.98	0.98	ns
LatP2	FC	ML	10	10	1.50009	9	0.168	0.551	ns
LatP2	FC	PL	10	10	1.97935	9	0.079	0.551	ns
LatP2	PC	MC	10	10	-0.199009	9	0.847	0.871	ns
LatP2	PC	FL	10	10	-1.38649	9	0.199	0.551	ns
LatP2	PC	ML	10	10	-0.610493	9	0.557	0.774	ns
LatP2	PC	PL	10	10	-0.354735	9	0.731	0.851	ns
LatP2	MC	FL	10	10	-1.8334	9	0.1	0.551	ns
LatP2	MC	ML	10	10	-0.817078	9	0.435	0.692	ns
LatP2	MC	PL	10	10	-0.256168	9	0.804	0.851	ns
LatP2	FL	ML	10	10	1.38639	9	0.199	0.551	ns
LatP2	FL	PL	10	10	1.65333	9	0.133	0.551	ns
LatP2	ML	PL	10	10	1.51436	9	0.164	0.551	ns

## Sheet: LatP2_FC_vs_Others
.y.	group1	group2	n1	n2	statistic	df	p	p.adj	p.adj.signif
LatP2	PR	FC	10	10	-0.300505	9	0.771	0.881	ns
LatP2	MR	FC	10	10	0.476542	9	0.645	0.86	ns
LatP2	FR	FC	10	10	-0.814717	9	0.436	0.698	ns
LatP2	FC	PC	10	10	1.41292	9	0.191	0.382	ns
LatP2	FC	MC	10	10	1.94938	9	0.083	0.332	ns
LatP2	FC	FL	10	10	0.0259288	9	0.98	0.98	ns
LatP2	FC	ML	10	10	1.50009	9	0.168	0.382	ns
LatP2	FC	PL	10	10	1.97935	9	0.079	0.332	ns

## Sheet: LatN2_All_Channels
.y.	group1	group2	n1	n2	statistic	df	p	p.adj	p.adj.signif
LatN2	PR	MR	10	10	-0.309153	9	0.764	0.908	ns
LatN2	PR	FR	10	10	0.763739	9	0.465	0.698	ns
LatN2	PR	FC	10	10	0.100031	9	0.923	0.977	ns
LatN2	PR	PC	10	10	1.0679	9	0.313	0.621	ns
LatN2	PR	MC	10	10	0.0619756	9	0.952	0.979	ns
LatN2	PR	FL	10	10	-0.0128921	9	0.99	0.99	ns
LatN2	PR	ML	10	10	-0.347336	9	0.736	0.908	ns
LatN2	PR	PL	10	10	0.590995	9	0.569	0.767	ns
LatN2	MR	FR	10	10	1.20653	9	0.258	0.621	ns
LatN2	MR	FC	10	10	1.71411	9	0.121	0.576	ns
LatN2	MR	PC	10	10	1.08906	9	0.304	0.621	ns
LatN2	MR	MC	10	10	1.82875	9	0.101	0.576	ns
LatN2	MR	FL	10	10	1.60591	9	0.143	0.576	ns
LatN2	MR	ML	10	10	-0.204771	9	0.842	0.947	ns
LatN2	MR	PL	10	10	2.51364	9	0.033	0.576	ns
LatN2	FR	FC	10	10	-0.967683	9	0.358	0.621	ns
LatN2	FR	PC	10	10	0.285173	9	0.782	0.908	ns
LatN2	FR	MC	10	10	-0.97612	9	0.355	0.621	ns
LatN2	FR	FL	10	10	-1.05791	9	0.318	0.621	ns
LatN2	FR	ML	10	10	-1.40419	9	0.194	0.582	ns
LatN2	FR	PL	10	10	-0.582091	9	0.575	0.767	ns
LatN2	FC	PC	10	10	0.89269	9	0.395	0.621	ns
LatN2	FC	MC	10	10	-0.152351	9	0.882	0.962	ns
LatN2	FC	FL	10	10	-0.888652	9	0.397	0.621	ns
LatN2	FC	ML	10	10	-1.66104	9	0.131	0.576	ns
LatN2	FC	PL	10	10	1.51286	9	0.165	0.576	ns
LatN2	PC	MC	10	10	-0.908264	9	0.387	0.621	ns
LatN2	PC	FL	10	10	-0.961935	9	0.361	0.621	ns
LatN2	PC	ML	10	10	-1.20006	9	0.261	0.621	ns
LatN2	PC	PL	10	10	-0.60805	9	0.558	0.767	ns
LatN2	MC	FL	10	10	-0.440639	9	0.67	0.861	ns
LatN2	MC	ML	10	10	-1.46994	9	0.176	0.576	ns
LatN2	MC	PL	10	10	1.569	9	0.151	0.576	ns
LatN2	FL	ML	10	10	-1.52798	9	0.161	0.576	ns
LatN2	FL	PL	10	10	2.04356	9	0.071	0.576	ns
LatN2	ML	PL	10	10	2.4409	9	0.037	0.576	ns

## Sheet: LatN2_FC_vs_Others
.y.	group1	group2	n1	n2	statistic	df	p	p.adj	p.adj.signif
LatN2	PR	FC	10	10	0.100031	9	0.923	0.923	ns
LatN2	MR	FC	10	10	1.71411	9	0.121	0.44	ns
LatN2	FR	FC	10	10	-0.967683	9	0.358	0.529	ns
LatN2	FC	PC	10	10	0.89269	9	0.395	0.529	ns
LatN2	FC	MC	10	10	-0.152351	9	0.882	0.923	ns
LatN2	FC	FL	10	10	-0.888652	9	0.397	0.529	ns
LatN2	FC	ML	10	10	-1.66104	9	0.131	0.44	ns
LatN2	FC	PL	10	10	1.51286	9	0.165	0.44	ns

## Sheet: LatP3_All_Channels
.y.	group1	group2	n1	n2	statistic	df	p	p.adj	p.adj.signif
LatP3	PR	MR	10	10	-1.5541	9	0.155	0.55	ns
LatP3	PR	FR	10	10	-1.34052	9	0.213	0.55	ns
LatP3	PR	FC	10	10	-1.3374	9	0.214	0.55	ns
LatP3	PR	PC	10	10	0.92086	9	0.381	0.807	ns
LatP3	PR	MC	10	10	-1.92801	9	0.086	0.514	ns
LatP3	PR	FL	10	10	-1.39703	9	0.196	0.55	ns
LatP3	PR	ML	10	10	-1.14969	9	0.28	0.672	ns
LatP3	PR	PL	10	10	-1.8311	9	0.1	0.514	ns
LatP3	MR	FR	10	10	-0.255977	9	0.804	0.931	ns
LatP3	MR	FC	10	10	0.026041	9	0.98	0.98	ns
LatP3	MR	PC	10	10	2.00173	9	0.076	0.514	ns
LatP3	MR	MC	10	10	-0.709435	9	0.496	0.931	ns
LatP3	MR	FL	10	10	0.108891	9	0.916	0.942	ns
LatP3	MR	ML	10	10	0.472788	9	0.648	0.931	ns
LatP3	MR	PL	10	10	-0.574755	9	0.58	0.931	ns
LatP3	FR	FC	10	10	0.248462	9	0.809	0.931	ns
LatP3	FR	PC	10	10	2.17806	9	0.057	0.514	ns
LatP3	FR	MC	10	10	-0.333499	9	0.746	0.931	ns
LatP3	FR	FL	10	10	0.323322	9	0.754	0.931	ns
LatP3	FR	ML	10	10	0.685942	9	0.51	0.931	ns
LatP3	FR	PL	10	10	-0.302185	9	0.769	0.931	ns
LatP3	FC	PC	10	10	1.71065	9	0.121	0.516	ns
LatP3	FC	MC	10	10	-0.49419	9	0.633	0.931	ns
LatP3	FC	FL	10	10	0.199683	9	0.846	0.931	ns
LatP3	FC	ML	10	10	0.280082	9	0.786	0.931	ns
LatP3	FC	PL	10	10	-0.44719	9	0.665	0.931	ns
LatP3	PC	MC	10	10	-2.10049	9	0.065	0.514	ns
LatP3	PC	FL	10	10	-1.67076	9	0.129	0.516	ns
LatP3	PC	ML	10	10	-1.40536	9	0.193	0.55	ns
LatP3	PC	PL	10	10	-2.0779	9	0.068	0.514	ns
LatP3	MC	FL	10	10	0.675003	9	0.517	0.931	ns
LatP3	MC	ML	10	10	1.83721	9	0.099	0.514	ns
LatP3	MC	PL	10	10	-0.147843	9	0.886	0.938	ns
LatP3	FL	ML	10	10	0.190707	9	0.853	0.931	ns
LatP3	FL	PL	10	10	-0.545243	9	0.599	0.931	ns
LatP3	ML	PL	10	10	-1.06087	9	0.316	0.711	ns

## Sheet: LatP3_FC_vs_Others
.y.	group1	group2	n1	n2	statistic	df	p	p.adj	p.adj.signif
LatP3	PR	FC	10	10	-1.3374	9	0.214	0.856	ns
LatP3	MR	FC	10	10	0.026041	9	0.98	0.98	ns
LatP3	FR	FC	10	10	0.248462	9	0.809	0.967	ns
LatP3	FC	PC	10	10	1.71065	9	0.121	0.856	ns
LatP3	FC	MC	10	10	-0.49419	9	0.633	0.967	ns
LatP3	FC	FL	10	10	0.199683	9	0.846	0.967	ns
LatP3	FC	ML	10	10	0.280082	9	0.786	0.967	ns
LatP3	FC	PL	10	10	-0.44719	9	0.665	0.967	ns

[truncated: 38 more sheets: AmplP1N1_All_Channels, AmplP1N1_FC_vs_Others, AmplN1P2_All_Channels, AmplN1P2_FC_vs_Others, AmplP2N2_All_Channels, AmplP2N2_FC_vs_Others, AmplN2P3_All_Channels, AmplN2P3_FC_vs_Others, dB_deltaPower_All_Channels, dB_deltaPower_FC_vs_Others, dB_thetaPower_All_Channels, dB_thetaPower_FC_vs_Others, dB_alphaPower_All_Channels, dB_alphaPower_FC_vs_Others, dB_betaPower_All_Channels, dB_betaPower_FC_vs_Others, dB_gammaPower_All_Channels, dB_gammaPower_FC_vs_Others, Time_deltaPower_All_Channels, Time_deltaPower_FC_vs_Others …]
