# Supplementary material for: Chronic alcohol-induced brain states limit propagation of direct cortical stimulation
Source: Sci Rep. 2025 Oct 10;15:35407. doi: 10.1038/s41598-025-21802-z (PMC12514308; doi:10.1038/s41598-025-21802-z)
Supplement: Supplementary file 7 — Supplementary Material 7 [file 41598_2025_21802_MOESM7_ESM.xlsx]

## Sheet: All_Channels
Variable	t_value	df	p_value	sig	conf_interval_low	conf_interval_high	estimate_mean_diff	hypothesis	cohens_d
LatP1	4.12095	89	8.44149e-05	*	1.39311	3.98739	2.69025	Paired t-test	0.582681
LatN1	5.57035	89	2.67096e-07	*	5.31625	11.212	8.26411	Paired t-test	0.863308
LatP2	3.21588	89	0.0018133	*	5.3841	22.7949	14.0895	Paired t-test	0.581586
LatN2	4.10518	89	8.9402e-05	*	11.1137	31.9643	21.539	Paired t-test	0.736202
LatP3	-3.05477	89	0.00297157	*	-68.8834	-14.5888	-41.7361	Paired t-test	-0.540061
AmplP1N1	-10.3829	89	5.20124e-17	*	-44.7611	-30.3811	-37.5711	Paired t-test	-1.67453
AmplN1P2	-6.38759	89	7.48858e-09	*	-21.5883	-11.3441	-16.4662	Paired t-test	-0.84091
AmplP2N2	-3.2499	89	0.00163024	*	-3.51447	-0.847546	-2.18101	Paired t-test	-0.463069
AmplN2P3	-6.10687	89	2.60919e-08	*	-17.288	-8.79988	-13.044	Paired t-test	-1.1087
dB_deltaPower	-10.5617	89	2.23196e-17	*	-7.25196	-4.95538	-6.10367	Paired t-test	-1.56374
dB_thetaPower	-11.2833	89	7.49056e-19	*	-7.77119	-5.44401	-6.6076	Paired t-test	-1.70112
dB_alphaPower	-11.487	89	2.89442e-19	*	-7.96389	-5.61505	-6.78947	Paired t-test	-1.72858
dB_betaPower	-11.179	89	1.22063e-18	*	-8.72218	-6.08952	-7.40585	Paired t-test	-1.682
dB_gammaPower	-8.68842	89	1.65772e-13	*	-7.08942	-4.45035	-5.76989	Paired t-test	-1.26892
Time_deltaPower	1.86455	89	0.0655412		-1.86176	58.5675	28.3529	Paired t-test	0.278406
Freq_deltaPower	-0.661768	89	0.50983		-0.333422	0.166816	-0.0833028	Paired t-test	-0.102765
Time_thetaPower	2.60998	89	0.0106229	*	8.94276	65.9862	37.4645	Paired t-test	0.399889
Freq_thetaPower	-5.28197	89	8.98014e-07	*	-0.769454	-0.348791	-0.559123	Paired t-test	-0.781745
Time_alphaPower	3.09071	89	0.00266546	*	15.8624	72.9746	44.4185	Paired t-test	0.474032
Freq_alphaPower	-0.614113	89	0.540707		-0.427025	0.225386	-0.10082	Paired t-test	-0.0905986
Time_betaPower	3.3788	89	0.00108204	*	19.5732	75.459	47.5161	Paired t-test	0.511056
Freq_betaPower	-0.578936	89	0.564095		-0.417811	0.229273	-0.0942688	Paired t-test	-0.0878709
Time_gammaPower	10.0248	89	2.8453e-16	*	177.418	265.135	221.276	Paired t-test	1.48072
Freq_gammaPower	5.37365	89	6.12663e-07	*	1.03101	2.2408	1.6359	Paired t-test	0.764625
