# Supplementary material for: Chronic alcohol-induced brain states limit propagation of direct cortical stimulation
Source: Sci Rep. 2025 Oct 10;15:35407. doi: 10.1038/s41598-025-21802-z (PMC12514308; doi:10.1038/s41598-025-21802-z)
Supplement: Supplementary file 8 — Supplementary Material 8 [file 41598_2025_21802_MOESM8_ESM.xlsx]

## Sheet: All_Channels
Variable	t_value	df	p_value	sig	conf_interval_low	conf_interval_high	estimate_mean_diff	hypothesis	cohens_d
LatP1	-2.23353	89	0.028021	*	-3.4162	-0.199563	-1.80788	Paired t-test	-0.29185
LatN1	-0.48494	89	0.62891		-4.44435	2.70056	-0.87189	Paired t-test	-0.0736477
LatP2	2.42554	89	0.0173044	*	1.89779	19.0942	10.496	Paired t-test	0.359753
LatN2	5.24225	89	1.05881e-06	*	25.0622	55.6577	40.36	Paired t-test	0.840085
LatP3	1.25325	89	0.213396		-11.7364	51.8294	20.0465	Paired t-test	0.205264
AmplP1N1	-3.87145	89	0.000206018	*	-18.7552	-6.03294	-12.394	Paired t-test	-0.619842
AmplN1P2	-0.777116	89	0.439151		-4.53909	1.98679	-1.27615	Paired t-test	-0.125686
AmplP2N2	4.84436	89	5.33158e-06	*	2.98776	7.14305	5.0654	Paired t-test	0.764972
AmplN2P3	-4.12907	89	8.19556e-05	*	-14.0405	-4.91756	-9.47904	Paired t-test	-0.67617
dB_deltaPower	-2.97102	89	0.0038159	*	-3.87123	-0.768345	-2.31979	Paired t-test	-0.478719
dB_thetaPower	-3.26985	89	0.00153103	*	-4.02658	-0.982646	-2.50462	Paired t-test	-0.523686
dB_alphaPower	-3.14601	89	0.00225113	*	-3.89716	-0.879978	-2.38857	Paired t-test	-0.511797
dB_betaPower	-2.05071	89	0.0432363	*	-3.18087	-0.0502054	-1.61554	Paired t-test	-0.342609
dB_gammaPower	-0.558172	89	0.578129		-1.76249	0.989432	-0.386527	Paired t-test	-0.0730816
Time_deltaPower	3.11851	89	0.00244905	*	14.9568	67.4855	41.2212	Paired t-test	0.416719
Freq_deltaPower	0.256052	89	0.798502		-0.0953797	0.123598	0.0141093	Paired t-test	0.0386916
Time_thetaPower	1.66595	89	0.0992385		-4.20428	47.8405	21.8181	Paired t-test	0.238206
Freq_thetaPower	-0.485651	89	0.628408		-0.313757	0.190506	-0.0616252	Paired t-test	-0.0771744
Time_alphaPower	0.765134	89	0.446216		-15.9911	36.0187	10.0138	Paired t-test	0.116779
Freq_alphaPower	1.23007	89	0.221912		-0.151994	0.646012	0.247009	Paired t-test	0.193635
Time_betaPower	-3.56008	89	0.000597557	*	-89.7948	-25.4651	-57.63	Paired t-test	-0.569812
Freq_betaPower	4.51149	89	1.95913e-05	*	1.76584	4.54552	3.15568	Paired t-test	0.726353
Time_gammaPower	-0.273169	89	0.785356		-52.1614	39.5525	-6.3044	Paired t-test	-0.0433734
Freq_gammaPower	-5.25569	89	1.00147e-06	*	-1.97697	-0.892232	-1.4346	Paired t-test	-0.747136
