# Supplementary material for: Chronic alcohol-induced brain states limit propagation of direct cortical stimulation
Source: Sci Rep. 2025 Oct 10;15:35407. doi: 10.1038/s41598-025-21802-z (PMC12514308; doi:10.1038/s41598-025-21802-z)
Supplement: Supplementary file 9 — Supplementary Material 9 [file 41598_2025_21802_MOESM9_ESM.xlsx]

## Sheet: All_Channels
Variable	t_value	df	p_value	sig	conf_interval_low	conf_interval_high	estimate_mean_diff	hypothesis	cohens_d
LatP1	1.36958	176.125	0.172562		-0.577215	3.19514	57.4779	Unpaired t-test	8.96508
LatN1	10.8699	170.429	3.05393e-21	*	13.0819	18.8875	95.4451	Unpaired t-test	9.6754
LatP2	11.0108	99.9663	6.12071e-19	*	29.6312	42.6562	142.148	Unpaired t-test	6.45541
LatN2	8.8595	138.032	3.564e-15	*	30.4606	47.9637	164.777	Unpaired t-test	5.54983
LatP3	1.39456	172.034	0.164947		-6.89999	40.1214	301.427	Unpaired t-test	3.77245
AmplP1N1	-0.498514	171.792	0.61876		-8.59205	5.12717	31.2245	Unpaired t-test	1.33939
AmplN1P2	1.35367	148.567	0.177899		-1.5108	8.08258	18.184	Unpaired t-test	1.11672
AmplP2N2	-2.05934	174.403	0.0409475	*	-2.7554	-0.0585408	4.29719	Unpaired t-test	0.93761
AmplN2P3	-3.32995	155.412	0.00108496	*	-10.1328	-2.58722	20.7785	Unpaired t-test	1.62176
dB_deltaPower	0.584405	176.972	0.559692		-0.994958	1.83216	22.6401	Unpaired t-test	4.71181
dB_thetaPower	0.842548	177.507	0.400615		-0.831696	2.071	24.0478	Unpaired t-test	4.87434
dB_alphaPower	1.00507	177.997	0.316228		-0.708919	2.18058	24.0523	Unpaired t-test	4.89745
dB_betaPower	1.22009	176.953	0.224054		-0.605792	2.56796	22.4438	Unpaired t-test	4.16079
dB_gammaPower	-4.70909	163.806	5.27467e-06	*	-5.45598	-2.23225	10.8827	Unpaired t-test	1.98734
Time_deltaPower	-0.357949	145.509	0.7209		-37.8411	26.236	131.081	Unpaired t-test	1.20541
Freq_deltaPower	-2.36864	123.56	0.019404	*	-0.444048	-0.0397573	3.62663	Unpaired t-test	5.29365
Time_thetaPower	-1.05424	150.762	0.29346		-45.025	13.6942	123.651	Unpaired t-test	1.24048
Freq_thetaPower	1.87017	170.132	0.0631784		-0.0134155	0.496651	7.24653	Unpaired t-test	8.36133
Time_alphaPower	-0.876975	141.261	0.381989		-44.5394	17.1661	124.108	Unpaired t-test	1.18546
Freq_alphaPower	2.09475	177.852	0.03761	*	0.0204705	0.686215	8.89859	Unpaired t-test	7.86413
Time_betaPower	-1.1603	176.731	0.24749		-58.8988	15.2835	122.472	Unpaired t-test	0.971388
Freq_betaPower	-3.69822	96.1024	0.000361483	*	-1.84172	-0.555209	12.248	Unpaired t-test	5.63413
Time_gammaPower	6.06607	150.679	1.01291e-08	*	107.021	210.416	281.886	Unpaired t-test	1.60601
Freq_gammaPower	0.246501	175.341	0.805583		-0.723989	0.930654	31.7311	Unpaired t-test	11.2839
