# Supplementary material for: Chronic alcohol-induced brain states limit propagation of direct cortical stimulation
Source: Sci Rep. 2025 Oct 10;15:35407. doi: 10.1038/s41598-025-21802-z (PMC12514308; doi:10.1038/s41598-025-21802-z)
Supplement: Supplementary file 10 — Supplementary Material 10 [file 41598_2025_21802_MOESM10_ESM.xlsx]

## Sheet: LatP1_All_Channels
.y.	group1	group2	n1	n2	statistic	df	p	p.adj	p.adj.signif
LatP1	PR	MR	10	10	1.0868	9	0.305	0.57	ns
LatP1	PR	FR	10	10	1.58952	9	0.146	0.57	ns
LatP1	PR	FC	10	10	1.29735	9	0.227	0.57	ns
LatP1	PR	PC	10	10	1.84773	9	0.098	0.57	ns
LatP1	PR	MC	10	10	2.53962	9	0.032	0.57	ns
LatP1	PR	FL	10	10	1.35387	9	0.209	0.57	ns
LatP1	PR	ML	10	10	1.2742	9	0.235	0.57	ns
LatP1	PR	PL	10	10	1.05075	9	0.321	0.57	ns
LatP1	MR	FR	10	10	-0.803093	9	0.443	0.57	ns
LatP1	MR	FC	10	10	-0.801727	9	0.443	0.57	ns
LatP1	MR	PC	10	10	-0.704787	9	0.499	0.619	ns
LatP1	MR	MC	10	10	-0.412608	9	0.69	0.776	ns
LatP1	MR	FL	10	10	-0.87359	9	0.405	0.57	ns
LatP1	MR	ML	10	10	-0.931312	9	0.376	0.57	ns
LatP1	MR	PL	10	10	-1.04771	9	0.322	0.57	ns
LatP1	FR	FC	10	10	-0.602595	9	0.562	0.674	ns
LatP1	FR	PC	10	10	0.186393	9	0.856	0.898	ns
LatP1	FR	MC	10	10	1.12142	9	0.291	0.57	ns
LatP1	FR	FL	10	10	-1.24855	9	0.243	0.57	ns
LatP1	FR	ML	10	10	-1.54467	9	0.157	0.57	ns
LatP1	FR	PL	10	10	-1.04968	9	0.321	0.57	ns
LatP1	FC	PC	10	10	0.858937	9	0.413	0.57	ns
LatP1	FC	MC	10	10	1.33657	9	0.214	0.57	ns
LatP1	FC	FL	10	10	-1.01659	9	0.336	0.57	ns
LatP1	FC	ML	10	10	-0.833793	9	0.426	0.57	ns
LatP1	FC	PL	10	10	-0.517477	9	0.617	0.717	ns
LatP1	PC	MC	10	10	0.986999	9	0.349	0.57	ns
LatP1	PC	FL	10	10	-1.91537	9	0.088	0.57	ns
LatP1	PC	ML	10	10	-1.4333	9	0.186	0.57	ns
LatP1	PC	PL	10	10	-0.862508	9	0.411	0.57	ns
LatP1	MC	FL	10	10	-1.79929	9	0.106	0.57	ns
LatP1	MC	ML	10	10	-1.80025	9	0.105	0.57	ns
LatP1	MC	PL	10	10	-1.59558	9	0.145	0.57	ns
LatP1	FL	ML	10	10	-0.131692	9	0.898	0.898	ns
LatP1	FL	PL	10	10	-0.162702	9	0.874	0.898	ns
LatP1	ML	PL	10	10	-0.169161	9	0.869	0.898	ns

## Sheet: LatP1_FC_vs_Others
.y.	group1	group2	n1	n2	statistic	df	p	p.adj	p.adj.signif
LatP1	PR	FC	10	10	1.29735	9	0.227	0.591	ns
LatP1	MR	FC	10	10	-0.801727	9	0.443	0.591	ns
LatP1	FR	FC	10	10	-0.602595	9	0.562	0.617	ns
LatP1	FC	PC	10	10	0.858937	9	0.413	0.591	ns
LatP1	FC	MC	10	10	1.33657	9	0.214	0.591	ns
LatP1	FC	FL	10	10	-1.01659	9	0.336	0.591	ns
LatP1	FC	ML	10	10	-0.833793	9	0.426	0.591	ns
LatP1	FC	PL	10	10	-0.517477	9	0.617	0.617	ns

## Sheet: LatN1_All_Channels
.y.	group1	group2	n1	n2	statistic	df	p	p.adj	p.adj.signif
LatN1	PR	MR	10	10	0.722166	9	0.489	0.677	ns
LatN1	PR	FR	10	10	0.721445	9	0.489	0.677	ns
LatN1	PR	FC	10	10	1.11448	9	0.294	0.65	ns
LatN1	PR	PC	10	10	0.965044	9	0.36	0.65	ns
LatN1	PR	MC	10	10	2.00925	9	0.075	0.65	ns
LatN1	PR	FL	10	10	0.889067	9	0.397	0.65	ns
LatN1	PR	ML	10	10	0.738841	9	0.479	0.677	ns
LatN1	PR	PL	10	10	0.469198	9	0.65	0.755	ns
LatN1	MR	FR	10	10	-0.639152	9	0.539	0.693	ns
LatN1	MR	FC	10	10	1.36676	9	0.205	0.65	ns
LatN1	MR	PC	10	10	1.21298	9	0.256	0.65	ns
LatN1	MR	MC	10	10	-0.0250532	9	0.981	0.981	ns
LatN1	MR	FL	10	10	-0.563488	9	0.587	0.729	ns
LatN1	MR	ML	10	10	-0.650157	9	0.532	0.693	ns
LatN1	MR	PL	10	10	-0.834123	9	0.426	0.667	ns
LatN1	FR	FC	10	10	1.22787	9	0.251	0.65	ns
LatN1	FR	PC	10	10	0.969799	9	0.357	0.65	ns
LatN1	FR	MC	10	10	1.89586	9	0.09	0.65	ns
LatN1	FR	FL	10	10	0.207265	9	0.84	0.889	ns
LatN1	FR	ML	10	10	-0.0350196	9	0.973	0.981	ns
LatN1	FR	PL	10	10	-0.42063	9	0.684	0.77	ns
LatN1	FC	PC	10	10	-0.897285	9	0.393	0.65	ns
LatN1	FC	MC	10	10	-0.524686	9	0.612	0.734	ns
LatN1	FC	FL	10	10	-1.16037	9	0.276	0.65	ns
LatN1	FC	ML	10	10	-1.26497	9	0.238	0.65	ns
LatN1	FC	PL	10	10	-1.4276	9	0.187	0.65	ns
LatN1	PC	MC	10	10	-0.303017	9	0.769	0.839	ns
LatN1	PC	FL	10	10	-0.947774	9	0.368	0.65	ns
LatN1	PC	ML	10	10	-1.05186	9	0.32	0.65	ns
LatN1	PC	PL	10	10	-1.24965	9	0.243	0.65	ns
LatN1	MC	FL	10	10	-1.21726	9	0.254	0.65	ns
LatN1	MC	ML	10	10	-1.40298	9	0.194	0.65	ns
LatN1	MC	PL	10	10	-1.64367	9	0.135	0.65	ns
LatN1	FL	ML	10	10	-1.81338	9	0.103	0.65	ns
LatN1	FL	PL	10	10	-1.53943	9	0.158	0.65	ns
LatN1	ML	PL	10	10	-1.10898	9	0.296	0.65	ns

## Sheet: LatN1_FC_vs_Others
.y.	group1	group2	n1	n2	statistic	df	p	p.adj	p.adj.signif
LatN1	PR	FC	10	10	1.11448	9	0.294	0.392	ns
LatN1	MR	FC	10	10	1.36676	9	0.205	0.392	ns
LatN1	FR	FC	10	10	1.22787	9	0.251	0.392	ns
LatN1	FC	PC	10	10	-0.897285	9	0.393	0.449	ns
LatN1	FC	MC	10	10	-0.524686	9	0.612	0.612	ns
LatN1	FC	FL	10	10	-1.16037	9	0.276	0.392	ns
LatN1	FC	ML	10	10	-1.26497	9	0.238	0.392	ns
LatN1	FC	PL	10	10	-1.4276	9	0.187	0.392	ns

## Sheet: LatP2_All_Channels
.y.	group1	group2	n1	n2	statistic	df	p	p.adj	p.adj.signif
LatP2	PR	MR	10	10	1.9387	9	0.084	0.473	ns
LatP2	PR	FR	10	10	2.26186	9	0.05	0.473	ns
LatP2	PR	FC	10	10	1.39318	9	0.197	0.473	ns
LatP2	PR	PC	10	10	0.452446	9	0.662	0.745	ns
LatP2	PR	MC	10	10	1.67904	9	0.127	0.473	ns
LatP2	PR	FL	10	10	1.55578	9	0.154	0.473	ns
LatP2	PR	ML	10	10	0.202001	9	0.844	0.894	ns
LatP2	PR	PL	10	10	0.786381	9	0.452	0.586	ns
LatP2	MR	FR	10	10	0.750376	9	0.472	0.586	ns
LatP2	MR	FC	10	10	-0.754176	9	0.47	0.586	ns
LatP2	MR	PC	10	10	-1.05291	9	0.32	0.498	ns
LatP2	MR	MC	10	10	1.31992	9	0.219	0.474	ns
LatP2	MR	FL	10	10	0.0644021	9	0.95	0.977	ns
LatP2	MR	ML	10	10	-1.30716	9	0.224	0.474	ns
LatP2	MR	PL	10	10	-0.357309	9	0.729	0.795	ns
LatP2	FR	FC	10	10	-1.26071	9	0.239	0.478	ns
LatP2	FR	PC	10	10	-1.7115	9	0.121	0.473	ns
LatP2	FR	MC	10	10	1.10835	9	0.296	0.498	ns
LatP2	FR	FL	10	10	-1.07575	9	0.31	0.498	ns
LatP2	FR	ML	10	10	-1.76757	9	0.111	0.473	ns
LatP2	FR	PL	10	10	-1.42746	9	0.187	0.473	ns
LatP2	FC	PC	10	10	-0.813752	9	0.437	0.586	ns
LatP2	FC	MC	10	10	1.6199	9	0.14	0.473	ns
LatP2	FC	FL	10	10	0.654048	9	0.529	0.614	ns
LatP2	FC	ML	10	10	-1.51776	9	0.163	0.473	ns
LatP2	FC	PL	10	10	0.0234523	9	0.982	0.982	ns
LatP2	PC	MC	10	10	1.81347	9	0.103	0.473	ns
LatP2	PC	FL	10	10	1.19166	9	0.264	0.498	ns
LatP2	PC	ML	10	10	-1.10837	9	0.296	0.498	ns
LatP2	PC	PL	10	10	0.699857	9	0.502	0.602	ns
LatP2	MC	FL	10	10	-1.44029	9	0.184	0.473	ns
LatP2	MC	ML	10	10	-1.90389	9	0.089	0.473	ns
LatP2	MC	PL	10	10	-1.58327	9	0.148	0.473	ns
LatP2	FL	ML	10	10	-1.40707	9	0.193	0.473	ns
LatP2	FL	PL	10	10	-1.02601	9	0.332	0.498	ns
LatP2	ML	PL	10	10	0.916224	9	0.383	0.552	ns

## Sheet: LatP2_FC_vs_Others
.y.	group1	group2	n1	n2	statistic	df	p	p.adj	p.adj.signif
LatP2	PR	FC	10	10	1.39318	9	0.197	0.478	ns
LatP2	MR	FC	10	10	-0.754176	9	0.47	0.605	ns
LatP2	FR	FC	10	10	-1.26071	9	0.239	0.478	ns
LatP2	FC	PC	10	10	-0.813752	9	0.437	0.605	ns
LatP2	FC	MC	10	10	1.6199	9	0.14	0.478	ns
LatP2	FC	FL	10	10	0.654048	9	0.529	0.605	ns
LatP2	FC	ML	10	10	-1.51776	9	0.163	0.478	ns
LatP2	FC	PL	10	10	0.0234523	9	0.982	0.982	ns

## Sheet: LatN2_All_Channels
.y.	group1	group2	n1	n2	statistic	df	p	p.adj	p.adj.signif
LatN2	PR	MR	10	10	0.791075	9	0.449	0.77	ns
LatN2	PR	FR	10	10	0.899264	9	0.392	0.77	ns
LatN2	PR	FC	10	10	1.01852	9	0.335	0.77	ns
LatN2	PR	PC	10	10	0.0276354	9	0.979	0.979	ns
LatN2	PR	MC	10	10	1.12268	9	0.291	0.77	ns
LatN2	PR	FL	10	10	0.218153	9	0.832	0.899	ns
LatN2	PR	ML	10	10	0.421168	9	0.684	0.851	ns
LatN2	PR	PL	10	10	0.796858	9	0.446	0.77	ns
LatN2	MR	FR	10	10	1.45752	9	0.179	0.77	ns
LatN2	MR	FC	10	10	0.236629	9	0.818	0.899	ns
LatN2	MR	PC	10	10	-0.847084	9	0.419	0.77	ns
LatN2	MR	MC	10	10	0.931801	9	0.376	0.77	ns
LatN2	MR	FL	10	10	-0.994711	9	0.346	0.77	ns
LatN2	MR	ML	10	10	-0.407266	9	0.693	0.851	ns
LatN2	MR	PL	10	10	-0.196102	9	0.849	0.899	ns
LatN2	FR	FC	10	10	0.12047	9	0.907	0.933	ns
LatN2	FR	PC	10	10	-0.987618	9	0.349	0.77	ns
LatN2	FR	MC	10	10	0.891506	9	0.396	0.77	ns
LatN2	FR	FL	10	10	-1.19825	9	0.261	0.77	ns
LatN2	FR	ML	10	10	-0.550562	9	0.595	0.851	ns
LatN2	FR	PL	10	10	-0.385435	9	0.709	0.851	ns
LatN2	FC	PC	10	10	-1.19862	9	0.261	0.77	ns
LatN2	FC	MC	10	10	0.83041	9	0.428	0.77	ns
LatN2	FC	FL	10	10	-1.06899	9	0.313	0.77	ns
LatN2	FC	ML	10	10	-0.622814	9	0.549	0.824	ns
LatN2	FC	PL	10	10	-0.752303	9	0.471	0.771	ns
LatN2	PC	MC	10	10	1.23503	9	0.248	0.77	ns
LatN2	PC	FL	10	10	0.22761	9	0.825	0.899	ns
LatN2	PC	ML	10	10	0.488551	9	0.637	0.851	ns
LatN2	PC	PL	10	10	0.895192	9	0.394	0.77	ns
LatN2	MC	FL	10	10	-1.18919	9	0.265	0.77	ns
LatN2	MC	ML	10	10	-1.25021	9	0.243	0.77	ns
LatN2	MC	PL	10	10	-0.999064	9	0.344	0.77	ns
LatN2	FL	ML	10	10	0.65366	9	0.53	0.824	ns
LatN2	FL	PL	10	10	1.45803	9	0.179	0.77	ns
LatN2	ML	PL	10	10	0.388505	9	0.707	0.851	ns

## Sheet: LatN2_FC_vs_Others
.y.	group1	group2	n1	n2	statistic	df	p	p.adj	p.adj.signif
LatN2	PR	FC	10	10	1.01852	9	0.335	0.732	ns
LatN2	MR	FC	10	10	0.236629	9	0.818	0.907	ns
LatN2	FR	FC	10	10	0.12047	9	0.907	0.907	ns
LatN2	FC	PC	10	10	-1.19862	9	0.261	0.732	ns
LatN2	FC	MC	10	10	0.83041	9	0.428	0.732	ns
LatN2	FC	FL	10	10	-1.06899	9	0.313	0.732	ns
LatN2	FC	ML	10	10	-0.622814	9	0.549	0.732	ns
LatN2	FC	PL	10	10	-0.752303	9	0.471	0.732	ns

## Sheet: LatP3_All_Channels
.y.	group1	group2	n1	n2	statistic	df	p	p.adj	p.adj.signif
LatP3	PR	MR	10	10	-0.839819	9	0.423	0.825	ns
LatP3	PR	FR	10	10	-0.529174	9	0.609	0.825	ns
LatP3	PR	FC	10	10	-0.346009	9	0.737	0.825	ns
LatP3	PR	PC	10	10	-0.372736	9	0.718	0.825	ns
LatP3	PR	MC	10	10	-0.0638491	9	0.95	0.977	ns
LatP3	PR	FL	10	10	-0.320651	9	0.756	0.825	ns
LatP3	PR	ML	10	10	-0.796887	9	0.446	0.825	ns
LatP3	PR	PL	10	10	-1.17449	9	0.27	0.825	ns
LatP3	MR	FR	10	10	0.35204	9	0.733	0.825	ns
LatP3	MR	FC	10	10	0.701286	9	0.501	0.825	ns
LatP3	MR	PC	10	10	0.651543	9	0.531	0.825	ns
LatP3	MR	MC	10	10	0.845624	9	0.42	0.825	ns
LatP3	MR	FL	10	10	0.647903	9	0.533	0.825	ns
LatP3	MR	ML	10	10	0.0294264	9	0.977	0.977	ns
LatP3	MR	PL	10	10	-0.707615	9	0.497	0.825	ns
LatP3	FR	FC	10	10	0.718934	9	0.49	0.825	ns
LatP3	FR	PC	10	10	0.681515	9	0.513	0.825	ns
LatP3	FR	MC	10	10	0.691524	9	0.507	0.825	ns
LatP3	FR	FL	10	10	0.776194	9	0.458	0.825	ns
LatP3	FR	ML	10	10	-1.06169	9	0.316	0.825	ns
LatP3	FR	PL	10	10	-0.854098	9	0.415	0.825	ns
LatP3	FC	PC	10	10	-0.56665	9	0.585	0.825	ns
LatP3	FC	MC	10	10	0.407037	9	0.693	0.825	ns
LatP3	FC	FL	10	10	0.0917511	9	0.929	0.977	ns
LatP3	FC	ML	10	10	-1.51544	9	0.164	0.825	ns
LatP3	FC	PL	10	10	-1.491	9	0.17	0.825	ns
LatP3	PC	MC	10	10	0.446439	9	0.666	0.825	ns
LatP3	PC	FL	10	10	0.407551	9	0.693	0.825	ns
LatP3	PC	ML	10	10	-1.48006	9	0.173	0.825	ns
LatP3	PC	PL	10	10	-1.39424	9	0.197	0.825	ns
LatP3	MC	FL	10	10	-0.386793	9	0.708	0.825	ns
LatP3	MC	ML	10	10	-1.00204	9	0.343	0.825	ns
LatP3	MC	PL	10	10	-1.23055	9	0.25	0.825	ns
LatP3	FL	ML	10	10	-1.29832	9	0.226	0.825	ns
LatP3	FL	PL	10	10	-1.24739	9	0.244	0.825	ns
LatP3	ML	PL	10	10	-0.729775	9	0.484	0.825	ns

## Sheet: LatP3_FC_vs_Others
.y.	group1	group2	n1	n2	statistic	df	p	p.adj	p.adj.signif
LatP3	PR	FC	10	10	-0.346009	9	0.737	0.842	ns
LatP3	MR	FC	10	10	0.701286	9	0.501	0.842	ns
LatP3	FR	FC	10	10	0.718934	9	0.49	0.842	ns
LatP3	FC	PC	10	10	-0.56665	9	0.585	0.842	ns
LatP3	FC	MC	10	10	0.407037	9	0.693	0.842	ns
LatP3	FC	FL	10	10	0.0917511	9	0.929	0.929	ns
LatP3	FC	ML	10	10	-1.51544	9	0.164	0.68	ns
LatP3	FC	PL	10	10	-1.491	9	0.17	0.68	ns

[truncated: 38 more sheets: AmplP1N1_All_Channels, AmplP1N1_FC_vs_Others, AmplN1P2_All_Channels, AmplN1P2_FC_vs_Others, AmplP2N2_All_Channels, AmplP2N2_FC_vs_Others, AmplN2P3_All_Channels, AmplN2P3_FC_vs_Others, dB_deltaPower_All_Channels, dB_deltaPower_FC_vs_Others, dB_thetaPower_All_Channels, dB_thetaPower_FC_vs_Others, dB_alphaPower_All_Channels, dB_alphaPower_FC_vs_Others, dB_betaPower_All_Channels, dB_betaPower_FC_vs_Others, dB_gammaPower_All_Channels, dB_gammaPower_FC_vs_Others, Time_deltaPower_All_Channels, Time_deltaPower_FC_vs_Others …]
