# Supplementary material for: Chronic alcohol-induced brain states limit propagation of direct cortical stimulation
Source: Sci Rep. 2025 Oct 10;15:35407. doi: 10.1038/s41598-025-21802-z (PMC12514308; doi:10.1038/s41598-025-21802-z)
Supplement: Supplementary file 11 — Supplementary Material 11 [file 41598_2025_21802_MOESM11_ESM.xlsx]

## Sheet: LatP1_All_Channels
.y.	group1	group2	n1	n2	statistic	df	p	p.adj	p.adj.signif
LatP1	PR	MR	10	10	-0.923879	9	0.38	0.57	ns
LatP1	PR	FR	10	10	-1.62031	9	0.14	0.454	ns
LatP1	PR	FC	10	10	-1.45098	9	0.181	0.454	ns
LatP1	PR	PC	10	10	-1.14703	9	0.281	0.531	ns
LatP1	PR	MC	10	10	0.953867	9	0.365	0.57	ns
LatP1	PR	FL	10	10	-0.697831	9	0.503	0.647	ns
LatP1	PR	ML	10	10	-0.105193	9	0.919	0.919	ns
LatP1	PR	PL	10	10	-1.55695	9	0.154	0.454	ns
LatP1	MR	FR	10	10	-1.2677	9	0.237	0.502	ns
LatP1	MR	FC	10	10	-1.34683	9	0.211	0.475	ns
LatP1	MR	PC	10	10	-0.199194	9	0.847	0.916	ns
LatP1	MR	MC	10	10	2.0023	9	0.076	0.454	ns
LatP1	MR	FL	10	10	0.147914	9	0.886	0.916	ns
LatP1	MR	ML	10	10	0.766678	9	0.463	0.635	ns
LatP1	MR	PL	10	10	-1.42172	9	0.189	0.454	ns
LatP1	FR	FC	10	10	0.967105	9	0.359	0.57	ns
LatP1	FR	PC	10	10	1.05857	9	0.317	0.543	ns
LatP1	FR	MC	10	10	2.68425	9	0.025	0.318	ns
LatP1	FR	FL	10	10	1.54808	9	0.156	0.454	ns
LatP1	FR	ML	10	10	1.44789	9	0.182	0.454	ns
LatP1	FR	PL	10	10	0.79989	9	0.444	0.635	ns
LatP1	FC	PC	10	10	0.496599	9	0.631	0.733	ns
LatP1	FC	MC	10	10	3.66008	9	0.005	0.188	ns
LatP1	FC	FL	10	10	1.76317	9	0.112	0.454	ns
LatP1	FC	ML	10	10	1.48308	9	0.172	0.454	ns
LatP1	FC	PL	10	10	-0.140374	9	0.891	0.916	ns
LatP1	PC	MC	10	10	1.52803	9	0.161	0.454	ns
LatP1	PC	FL	10	10	0.245599	9	0.812	0.914	ns
LatP1	PC	ML	10	10	0.654739	9	0.529	0.657	ns
LatP1	PC	PL	10	10	-0.744605	9	0.476	0.635	ns
LatP1	MC	FL	10	10	-1.99386	9	0.077	0.454	ns
LatP1	MC	ML	10	10	-1.11246	9	0.295	0.531	ns
LatP1	MC	PL	10	10	-2.47314	9	0.035	0.319	ns
LatP1	FL	ML	10	10	0.610079	9	0.557	0.668	ns
LatP1	FL	PL	10	10	-1.14486	9	0.282	0.531	ns
LatP1	ML	PL	10	10	-2.64893	9	0.026	0.318	ns

## Sheet: LatP1_FC_vs_Others
.y.	group1	group2	n1	n2	statistic	df	p	p.adj	p.adj.signif
LatP1	PR	FC	10	10	-1.45098	9	0.181	0.338	ns
LatP1	MR	FC	10	10	-1.34683	9	0.211	0.338	ns
LatP1	FR	FC	10	10	0.967105	9	0.359	0.479	ns
LatP1	FC	PC	10	10	0.496599	9	0.631	0.721	ns
LatP1	FC	MC	10	10	3.66008	9	0.005	0.042	*
LatP1	FC	FL	10	10	1.76317	9	0.112	0.338	ns
LatP1	FC	ML	10	10	1.48308	9	0.172	0.338	ns
LatP1	FC	PL	10	10	-0.140374	9	0.891	0.891	ns

## Sheet: LatN1_All_Channels
.y.	group1	group2	n1	n2	statistic	df	p	p.adj	p.adj.signif
LatN1	PR	MR	10	10	-1.11451	9	0.294	0.518	ns
LatN1	PR	FR	10	10	-0.753175	9	0.471	0.606	ns
LatN1	PR	FC	10	10	-0.77945	9	0.456	0.606	ns
LatN1	PR	PC	10	10	2.17195	9	0.058	0.208	ns
LatN1	PR	MC	10	10	-0.105991	9	0.918	0.944	ns
LatN1	PR	FL	10	10	-1.00573	9	0.341	0.518	ns
LatN1	PR	ML	10	10	-0.973573	9	0.356	0.518	ns
LatN1	PR	PL	10	10	2.23469	9	0.052	0.208	ns
LatN1	MR	FR	10	10	0.500075	9	0.629	0.73	ns
LatN1	MR	FC	10	10	1.08738	9	0.305	0.518	ns
LatN1	MR	PC	10	10	1.69125	9	0.125	0.371	ns
LatN1	MR	MC	10	10	1.64589	9	0.134	0.371	ns
LatN1	MR	FL	10	10	1.02559	9	0.332	0.518	ns
LatN1	MR	ML	10	10	1.10269	9	0.299	0.518	ns
LatN1	MR	PL	10	10	2.21896	9	0.054	0.208	ns
LatN1	FR	FC	10	10	0.510034	9	0.622	0.73	ns
LatN1	FR	PC	10	10	1.41201	9	0.192	0.461	ns
LatN1	FR	MC	10	10	0.903791	9	0.39	0.54	ns
LatN1	FR	FL	10	10	0.437248	9	0.672	0.733	ns
LatN1	FR	ML	10	10	0.523224	9	0.613	0.73	ns
LatN1	FR	PL	10	10	2.11293	9	0.064	0.209	ns
LatN1	FC	PC	10	10	2.2811	9	0.048	0.208	ns
LatN1	FC	MC	10	10	1.3049	9	0.224	0.474	ns
LatN1	FC	FL	10	10	-0.00829903	9	0.994	0.994	ns
LatN1	FC	ML	10	10	0.407902	9	0.693	0.734	ns
LatN1	FC	PL	10	10	2.45566	9	0.036	0.208	ns
LatN1	PC	MC	10	10	-1.42451	9	0.188	0.461	ns
LatN1	PC	FL	10	10	-2.56647	9	0.03	0.208	ns
LatN1	PC	ML	10	10	-4.15855	9	0.002	0.088	ns
LatN1	PC	PL	10	10	1.36062	9	0.207	0.466	ns
LatN1	MC	FL	10	10	-1.10896	9	0.296	0.518	ns
LatN1	MC	ML	10	10	-0.965198	9	0.36	0.518	ns
LatN1	MC	PL	10	10	2.22864	9	0.053	0.208	ns
LatN1	FL	ML	10	10	0.465501	9	0.653	0.733	ns
LatN1	FL	PL	10	10	3.34229	9	0.009	0.155	ns
LatN1	ML	PL	10	10	2.74554	9	0.023	0.208	ns

## Sheet: LatN1_FC_vs_Others
.y.	group1	group2	n1	n2	statistic	df	p	p.adj	p.adj.signif
LatN1	PR	FC	10	10	-0.77945	9	0.456	0.73	ns
LatN1	MR	FC	10	10	1.08738	9	0.305	0.61	ns
LatN1	FR	FC	10	10	0.510034	9	0.622	0.792	ns
LatN1	FC	PC	10	10	2.2811	9	0.048	0.194	ns
LatN1	FC	MC	10	10	1.3049	9	0.224	0.597	ns
LatN1	FC	FL	10	10	-0.00829903	9	0.994	0.994	ns
LatN1	FC	ML	10	10	0.407902	9	0.693	0.792	ns
LatN1	FC	PL	10	10	2.45566	9	0.036	0.194	ns

## Sheet: LatP2_All_Channels
.y.	group1	group2	n1	n2	statistic	df	p	p.adj	p.adj.signif
LatP2	PR	MR	10	10	-2.05271	9	0.07	0.127	ns
LatP2	PR	FR	10	10	-2.12497	9	0.062	0.118	ns
LatP2	PR	FC	10	10	-3.00345	9	0.015	0.06	ns
LatP2	PR	PC	10	10	1.26295	9	0.238	0.317	ns
LatP2	PR	MC	10	10	-0.980384	9	0.353	0.424	ns
LatP2	PR	FL	10	10	-2.89251	9	0.018	0.064	ns
LatP2	PR	ML	10	10	-1.73638	9	0.117	0.182	ns
LatP2	PR	PL	10	10	0.371629	9	0.719	0.761	ns
LatP2	MR	FR	10	10	-1.65556	9	0.132	0.19	ns
LatP2	MR	FC	10	10	-3.09299	9	0.013	0.058	ns
LatP2	MR	PC	10	10	2.55868	9	0.031	0.079	ns
LatP2	MR	MC	10	10	0.812121	9	0.438	0.509	ns
LatP2	MR	FL	10	10	-2.74663	9	0.023	0.068	ns
LatP2	MR	ML	10	10	-0.0389205	9	0.97	0.97	ns
LatP2	MR	PL	10	10	4.00638	9	0.003	0.028	*
LatP2	FR	FC	10	10	1.01005	9	0.339	0.424	ns
LatP2	FR	PC	10	10	2.4771	9	0.035	0.079	ns
LatP2	FR	MC	10	10	1.95414	9	0.082	0.141	ns
LatP2	FR	FL	10	10	0.998913	9	0.344	0.424	ns
LatP2	FR	ML	10	10	1.57568	9	0.15	0.208	ns
LatP2	FR	PL	10	10	2.1448	9	0.06	0.118	ns
LatP2	FC	PC	10	10	4.01514	9	0.003	0.028	*
LatP2	FC	MC	10	10	3.46113	9	0.007	0.038	*
LatP2	FC	FL	10	10	-0.165535	9	0.872	0.897	ns
LatP2	FC	ML	10	10	2.75225	9	0.022	0.068	ns
LatP2	FC	PL	10	10	4.52111	9	0.001	0.028	*
LatP2	PC	MC	10	10	-1.71213	9	0.121	0.182	ns
LatP2	PC	FL	10	10	-3.8024	9	0.004	0.03	*
LatP2	PC	ML	10	10	-2.48271	9	0.035	0.079	ns
LatP2	PC	PL	10	10	-0.726036	9	0.486	0.547	ns
LatP2	MC	FL	10	10	-3.43567	9	0.007	0.038	*
LatP2	MC	ML	10	10	-0.605654	9	0.56	0.611	ns
LatP2	MC	PL	10	10	1.91451	9	0.088	0.144	ns
LatP2	FL	ML	10	10	2.48163	9	0.035	0.079	ns
LatP2	FL	PL	10	10	4.22779	9	0.002	0.028	*
LatP2	ML	PL	10	10	2.27167	9	0.049	0.104	ns

## Sheet: LatP2_FC_vs_Others
.y.	group1	group2	n1	n2	statistic	df	p	p.adj	p.adj.signif
LatP2	PR	FC	10	10	-3.00345	9	0.015	0.024	*
LatP2	MR	FC	10	10	-3.09299	9	0.013	0.024	*
LatP2	FR	FC	10	10	1.01005	9	0.339	0.387	ns
LatP2	FC	PC	10	10	4.01514	9	0.003	0.012	*
LatP2	FC	MC	10	10	3.46113	9	0.007	0.019	*
LatP2	FC	FL	10	10	-0.165535	9	0.872	0.872	ns
LatP2	FC	ML	10	10	2.75225	9	0.022	0.03	*
LatP2	FC	PL	10	10	4.52111	9	0.001	0.012	*

## Sheet: LatN2_All_Channels
.y.	group1	group2	n1	n2	statistic	df	p	p.adj	p.adj.signif
LatN2	PR	MR	10	10	-1.21911	9	0.254	0.459	ns
LatN2	PR	FR	10	10	-0.619267	9	0.551	0.667	ns
LatN2	PR	FC	10	10	1.24767	9	0.244	0.459	ns
LatN2	PR	PC	10	10	2.55007	9	0.031	0.281	ns
LatN2	PR	MC	10	10	-1.81787	9	0.102	0.378	ns
LatN2	PR	FL	10	10	-0.875027	9	0.404	0.632	ns
LatN2	PR	ML	10	10	-0.0775032	9	0.94	0.972	ns
LatN2	PR	PL	10	10	-1.46435	9	0.177	0.459	ns
LatN2	MR	FR	10	10	-0.38458	9	0.709	0.798	ns
LatN2	MR	FC	10	10	1.69394	9	0.125	0.409	ns
LatN2	MR	PC	10	10	2.84864	9	0.019	0.262	ns
LatN2	MR	MC	10	10	-1.81099	9	0.104	0.378	ns
LatN2	MR	FL	10	10	-0.730761	9	0.484	0.645	ns
LatN2	MR	ML	10	10	1.09586	9	0.302	0.494	ns
LatN2	MR	PL	10	10	-1.2604	9	0.239	0.459	ns
LatN2	FR	FC	10	10	1.30084	9	0.226	0.459	ns
LatN2	FR	PC	10	10	1.29705	9	0.227	0.459	ns
LatN2	FR	MC	10	10	-0.74651	9	0.474	0.645	ns
LatN2	FR	FL	10	10	-0.461143	9	0.656	0.762	ns
LatN2	FR	ML	10	10	0.611185	9	0.556	0.667	ns
LatN2	FR	PL	10	10	-0.769737	9	0.461	0.645	ns
LatN2	FC	PC	10	10	-0.0360832	9	0.972	0.972	ns
LatN2	FC	MC	10	10	-3.50013	9	0.007	0.242	ns
LatN2	FC	FL	10	10	-1.14532	9	0.282	0.483	ns
LatN2	FC	ML	10	10	-1.60615	9	0.143	0.429	ns
LatN2	FC	PL	10	10	-1.79993	9	0.105	0.378	ns
LatN2	PC	MC	10	10	-2.76864	9	0.022	0.262	ns
LatN2	PC	FL	10	10	-1.21475	9	0.255	0.459	ns
LatN2	PC	ML	10	10	-1.89122	9	0.091	0.378	ns
LatN2	PC	PL	10	10	-1.95142	9	0.083	0.378	ns
LatN2	MC	FL	10	10	-0.0646806	9	0.95	0.972	ns
LatN2	MC	ML	10	10	2.21776	9	0.054	0.378	ns
LatN2	MC	PL	10	10	-0.345628	9	0.738	0.805	ns
LatN2	FL	ML	10	10	0.812456	9	0.437	0.645	ns
LatN2	FL	PL	10	10	-0.632918	9	0.543	0.667	ns
LatN2	ML	PL	10	10	-1.34614	9	0.211	0.459	ns

## Sheet: LatN2_FC_vs_Others
.y.	group1	group2	n1	n2	statistic	df	p	p.adj	p.adj.signif
LatN2	PR	FC	10	10	1.24767	9	0.244	0.322	ns
LatN2	MR	FC	10	10	1.69394	9	0.125	0.286	ns
LatN2	FR	FC	10	10	1.30084	9	0.226	0.322	ns
LatN2	FC	PC	10	10	-0.0360832	9	0.972	0.972	ns
LatN2	FC	MC	10	10	-3.50013	9	0.007	0.054	ns
LatN2	FC	FL	10	10	-1.14532	9	0.282	0.322	ns
LatN2	FC	ML	10	10	-1.60615	9	0.143	0.286	ns
LatN2	FC	PL	10	10	-1.79993	9	0.105	0.286	ns

## Sheet: LatP3_All_Channels
.y.	group1	group2	n1	n2	statistic	df	p	p.adj	p.adj.signif
LatP3	PR	MR	10	10	-0.300004	9	0.771	0.867	ns
LatP3	PR	FR	10	10	-0.68823	9	0.509	0.858	ns
LatP3	PR	FC	10	10	-0.0383846	9	0.97	0.97	ns
LatP3	PR	PC	10	10	-0.994935	9	0.346	0.858	ns
LatP3	PR	MC	10	10	-0.780425	9	0.455	0.858	ns
LatP3	PR	FL	10	10	-1.45846	9	0.179	0.736	ns
LatP3	PR	ML	10	10	-0.559825	9	0.589	0.858	ns
LatP3	PR	PL	10	10	-1.93834	9	0.084	0.736	ns
LatP3	MR	FR	10	10	-0.72502	9	0.487	0.858	ns
LatP3	MR	FC	10	10	0.796591	9	0.446	0.858	ns
LatP3	MR	PC	10	10	-0.600743	9	0.563	0.858	ns
LatP3	MR	MC	10	10	-0.609607	9	0.557	0.858	ns
LatP3	MR	FL	10	10	-1.68497	9	0.126	0.736	ns
LatP3	MR	ML	10	10	-0.871289	9	0.406	0.858	ns
LatP3	MR	PL	10	10	-1.71612	9	0.12	0.736	ns
LatP3	FR	FC	10	10	1.10019	9	0.3	0.858	ns
LatP3	FR	PC	10	10	-0.322241	9	0.755	0.867	ns
LatP3	FR	MC	10	10	0.0406637	9	0.968	0.97	ns
LatP3	FR	FL	10	10	-0.422197	9	0.683	0.858	ns
LatP3	FR	ML	10	10	0.410425	9	0.691	0.858	ns
LatP3	FR	PL	10	10	-0.853755	9	0.415	0.858	ns
LatP3	FC	PC	10	10	-0.725909	9	0.486	0.858	ns
LatP3	FC	MC	10	10	-0.993743	9	0.346	0.858	ns
LatP3	FC	FL	10	10	-1.4382	9	0.184	0.736	ns
LatP3	FC	ML	10	10	-0.976325	9	0.354	0.858	ns
LatP3	FC	PL	10	10	-1.89211	9	0.091	0.736	ns
LatP3	PC	MC	10	10	0.247607	9	0.81	0.884	ns
LatP3	PC	FL	10	10	-0.089742	9	0.93	0.97	ns
LatP3	PC	ML	10	10	0.462819	9	0.654	0.858	ns
LatP3	PC	PL	10	10	-0.470981	9	0.649	0.858	ns
LatP3	MC	FL	10	10	-0.441304	9	0.669	0.858	ns
LatP3	MC	ML	10	10	0.333761	9	0.746	0.867	ns
LatP3	MC	PL	10	10	-2.33193	9	0.045	0.736	ns
LatP3	FL	ML	10	10	1.75832	9	0.113	0.736	ns
LatP3	FL	PL	10	10	-0.605201	9	0.56	0.858	ns
LatP3	ML	PL	10	10	-1.57382	9	0.15	0.736	ns

## Sheet: LatP3_FC_vs_Others
.y.	group1	group2	n1	n2	statistic	df	p	p.adj	p.adj.signif
LatP3	PR	FC	10	10	-0.0383846	9	0.97	0.97	ns
LatP3	MR	FC	10	10	0.796591	9	0.446	0.555	ns
LatP3	FR	FC	10	10	1.10019	9	0.3	0.555	ns
LatP3	FC	PC	10	10	-0.725909	9	0.486	0.555	ns
LatP3	FC	MC	10	10	-0.993743	9	0.346	0.555	ns
LatP3	FC	FL	10	10	-1.4382	9	0.184	0.555	ns
LatP3	FC	ML	10	10	-0.976325	9	0.354	0.555	ns
LatP3	FC	PL	10	10	-1.89211	9	0.091	0.555	ns

[truncated: 38 more sheets: AmplP1N1_All_Channels, AmplP1N1_FC_vs_Others, AmplN1P2_All_Channels, AmplN1P2_FC_vs_Others, AmplP2N2_All_Channels, AmplP2N2_FC_vs_Others, AmplN2P3_All_Channels, AmplN2P3_FC_vs_Others, dB_deltaPower_All_Channels, dB_deltaPower_FC_vs_Others, dB_thetaPower_All_Channels, dB_thetaPower_FC_vs_Others, dB_alphaPower_All_Channels, dB_alphaPower_FC_vs_Others, dB_betaPower_All_Channels, dB_betaPower_FC_vs_Others, dB_gammaPower_All_Channels, dB_gammaPower_FC_vs_Others, Time_deltaPower_All_Channels, Time_deltaPower_FC_vs_Others …]
