# Supplementary material for: Chronic alcohol-induced brain states limit propagation of direct cortical stimulation
Source: Sci Rep. 2025 Oct 10;15:35407. doi: 10.1038/s41598-025-21802-z (PMC12514308; doi:10.1038/s41598-025-21802-z)
Supplement: Supplementary file 12 — Supplementary Material 12 [file 41598_2025_21802_MOESM12_ESM.xlsx]

## Sheet: Channel_PR_Comparison
Variable	t_value	df	p_value	sig	conf_interval_low	conf_interval_high	estimate_mean_diff	hypothesis	cohens_d
LatP1	1.58812	9	0.146721		-1.09006	6.22672	2.56833	Paired t-test	0.610735
LatN1	1.83959	9	0.0989764		-2.23127	21.6582	9.71347	Paired t-test	0.957554
LatP2	1.39934	9	0.19522		-11.6439	49.4125	18.8843	Paired t-test	0.767264
LatN2	1.58278	9	0.147932		-10.9592	62.0232	25.532	Paired t-test	0.846243
LatP3	-1.06817	9	0.313255		-141.126	50.5963	-45.2649	Paired t-test	-0.577686
AmplP1N1	-3.79154	9	0.00427254	*	-66.9511	-16.9143	-41.9327	Paired t-test	-1.99793
AmplN1P2	-1.7246	9	0.118686		-29.1877	3.9355	-12.6261	Paired t-test	-0.704328
AmplP2N2	-1.7041	9	0.12256		-4.54131	0.63897	-1.95117	Paired t-test	-0.48005
AmplN2P3	-4.3753	9	0.00178328	*	-27.3681	-8.71309	-18.0406	Paired t-test	-2.31449
dB_deltaPower	-4.28325	9	0.00204021	*	-10.5362	-3.25336	-6.89477	Paired t-test	-2.31552
dB_thetaPower	-4.37651	9	0.00178013	*	-11.2322	-3.57735	-7.40477	Paired t-test	-2.28245
dB_alphaPower	-4.30488	9	0.00197647	*	-11.3067	-3.51703	-7.41187	Paired t-test	-2.19425
dB_betaPower	-3.98083	9	0.00320179	*	-12.9973	-3.57811	-8.2877	Paired t-test	-1.94915
dB_gammaPower	-4.2346	9	0.0021917	*	-11.8148	-3.58701	-7.70089	Paired t-test	-1.68422
Time_deltaPower	1.26297	9	0.238337		-54.4238	192.008	68.792	Paired t-test	0.558782
Freq_deltaPower	-1	9	0.343436		-0.14933	0.057777	-0.0457764	Paired t-test	-0.447214
Time_thetaPower	1.32736	9	0.217074		-37.3886	143.567	53.0895	Paired t-test	0.611554
Freq_thetaPower	-1.98749	9	0.078112		-1.57272	0.10165	-0.735535	Paired t-test	-0.89961
Time_alphaPower	1.06113	9	0.316275		-49.2909	136.39	43.5495	Paired t-test	0.493044
Freq_alphaPower	0.0905432	9	0.929839		-1.11328	1.20612	0.0464172	Paired t-test	0.0342594
Time_betaPower	1.07845	9	0.308887		-45.0665	127.185	41.0591	Paired t-test	0.501322
Freq_betaPower	1.0652	9	0.314528		-0.316246	0.879112	0.281433	Paired t-test	0.47637
Time_gammaPower	3.4747	9	0.0069967	*	78.5446	371.614	225.079	Paired t-test	1.53886
Freq_gammaPower	1.93265	9	0.0853091		-0.265794	3.38371	1.55896	Paired t-test	0.864308

## Sheet: Channel_MR_Comparison
Variable	t_value	df	p_value	sig	conf_interval_low	conf_interval_high	estimate_mean_diff	hypothesis	cohens_d
LatP1	0.920363	9	0.38139		-2.94689	6.98956	2.02133	Paired t-test	0.398845
LatN1	0.965799	9	0.359378		-7.68447	19.1345	5.725	Paired t-test	0.447938
LatP2	1.48019	9	0.172957		-11.7945	56.4458	22.3257	Paired t-test	0.83058
LatN2	1.57605	9	0.149468		-11.6366	65.0972	26.7303	Paired t-test	0.84912
LatP3	-0.603879	9	0.560835		-121.448	70.2695	-25.5893	Paired t-test	-0.313607
AmplP1N1	-3.31343	9	0.00903442	*	-61.7045	-11.6343	-36.6694	Paired t-test	-1.58406
AmplN1P2	-1.78692	9	0.107593		-28.2166	3.31174	-12.4524	Paired t-test	-0.617722
AmplP2N2	-0.390715	9	0.705096		-6.11068	4.31072	-0.89998	Paired t-test	-0.159958
AmplN2P3	-2.45303	9	0.0365746	*	-31.23	-1.26419	-16.2471	Paired t-test	-1.32118
dB_deltaPower	-3.81925	9	0.00409462	*	-9.89272	-2.53295	-6.21284	Paired t-test	-1.75201
dB_thetaPower	-4.20614	9	0.00228583	*	-10.9646	-3.29531	-7.12996	Paired t-test	-1.90345
dB_alphaPower	-4.06444	9	0.00282307	*	-11.0433	-3.14595	-7.09462	Paired t-test	-1.85397
dB_betaPower	-3.51143	9	0.00660371	*	-12.0606	-2.60965	-7.33514	Paired t-test	-1.60009
dB_gammaPower	-2.00975	9	0.0753581		-8.3865	0.495514	-3.94549	Paired t-test	-0.840495
Time_deltaPower	-1.28234	9	0.231765		-60.9937	16.8607	-22.0665	Paired t-test	-0.539604
Freq_deltaPower	-0.0598717	9	0.953566		-1.03681	0.983345	-0.0267334	Paired t-test	-0.0289716
Time_thetaPower	1.82251	9	0.101697		-3.37879	31.3918	14.0065	Paired t-test	0.736207
Freq_thetaPower	-1.71879	9	0.119772		-1.58824	0.21678	-0.68573	Paired t-test	-0.792036
Time_alphaPower	-0.236045	9	0.818682		-10.1927	8.26659	-0.963068	Paired t-test	-0.0825436
Freq_alphaPower	1.16236	9	0.274984		-0.648216	2.01839	0.685089	Paired t-test	0.521443
Time_betaPower	0.15461	9	0.880541		-6.42307	7.36546	0.471196	Paired t-test	0.0554672
Freq_betaPower	1	9	0.343436		-0.381328	0.985576	0.302124	Paired t-test	0.447214
Time_gammaPower	1.80544	9	0.104487		-23.734	211.38	93.8228	Paired t-test	0.80712
Freq_gammaPower	1.0594	9	0.31702		-0.60286	1.66487	0.531006	Paired t-test	0.473779

## Sheet: Channel_FR_Comparison
Variable	t_value	df	p_value	sig	conf_interval_low	conf_interval_high	estimate_mean_diff	hypothesis	cohens_d
LatP1	1.58283	9	0.14792		-1.24636	7.05436	2.904	Paired t-test	0.707
LatN1	1.15462	9	0.277981		-3.11154	9.59921	3.24383	Paired t-test	0.34362
LatP2	0.785957	9	0.452088		-16.343	33.7457	8.70133	Paired t-test	0.428803
LatN2	1.25461	9	0.241223		-12.1318	42.3452	15.1067	Paired t-test	0.631316
LatP3	-1.01629	9	0.336031		-103.119	39.1869	-31.966	Paired t-test	-0.459555
AmplP1N1	-4.06706	9	0.002812	*	-48.4404	-13.8138	-31.1271	Paired t-test	-1.48306
AmplN1P2	-2.0271	9	0.0732765		-33.0183	1.80942	-15.6044	Paired t-test	-0.749332
AmplP2N2	-0.197717	9	0.84766		-3.64197	3.05651	-0.29273	Paired t-test	-0.0735257
AmplN2P3	-1.6182	9	0.140073		-25.1944	4.18109	-10.5066	Paired t-test	-0.854136
dB_deltaPower	-3.69058	9	0.00499289	*	-10.9999	-2.63953	-6.8197	Paired t-test	-1.36381
dB_thetaPower	-3.77552	9	0.00437911	*	-11.2001	-2.80734	-7.00371	Paired t-test	-1.42626
dB_alphaPower	-3.86147	9	0.00383844	*	-11.1716	-2.9177	-7.04465	Paired t-test	-1.42686
dB_betaPower	-3.88638	9	0.00369527	*	-10.6992	-2.82634	-6.76275	Paired t-test	-1.2737
dB_gammaPower	-1.89049	9	0.0912653		-7.77353	0.695748	-3.53889	Paired t-test	-0.860282
Time_deltaPower	-1.57971	9	0.148631		-195.372	34.7047	-80.3335	Paired t-test	-0.68469
Freq_deltaPower	0.0670385	9	0.948017		-0.959302	1.0179	0.0292969	Paired t-test	0.0318382
Time_thetaPower	-1.32381	9	0.218204		-102.834	26.9088	-37.9625	Paired t-test	-0.584267
Freq_thetaPower	2.55563	9	0.030908	*	0.015402	0.252848	0.134125	Paired t-test	0.61378
Time_alphaPower	-1.25198	9	0.242135		-101.114	29.0662	-36.0237	Paired t-test	-0.553483
Freq_alphaPower	2.77969	9	0.0214117	*	0.183512	1.7878	0.985657	Paired t-test	1.3052
Time_betaPower	-1.10553	9	0.297606		-7.49784	2.57512	-2.46136	Paired t-test	-0.309404
Freq_betaPower	1.5	9	0.167851		-1.98567e-15	9.80164e-15	3.90799e-15	Paired t-test	0.489225
Time_gammaPower	3.50725	9	0.00664729	*	95.0873	440.607	267.847	Paired t-test	1.61367
Freq_gammaPower	1.69615	9	0.124092		-0.512802	3.58623	1.53671	Paired t-test	0.758542

## Sheet: Channel_FC_Comparison
Variable	t_value	df	p_value	sig	conf_interval_low	conf_interval_high	estimate_mean_diff	hypothesis	cohens_d
LatP1	2.04353	9	0.0713572		-0.46076	9.07409	4.30667	Paired t-test	0.830903
LatN1	1.95899	9	0.0817775		-1.32371	18.4304	8.55333	Paired t-test	0.879017
LatP2	1.18408	9	0.266708		-15.8331	50.6131	17.39	Paired t-test	0.675113
LatN2	1.62416	9	0.138788		-10.5159	64.0572	26.7707	Paired t-test	0.865434
LatP3	-0.427319	9	0.679188		-136.677	93.2449	-21.716	Paired t-test	-0.244663
AmplP1N1	-2.69214	9	0.0247099	*	-61.5972	-5.34597	-33.4716	Paired t-test	-1.4901
AmplN1P2	-2.03253	9	0.072637		-28.7768	1.53864	-13.6191	Paired t-test	-0.677919
AmplP2N2	-0.802857	9	0.442742		-6.82158	3.24786	-1.78686	Paired t-test	-0.367097
AmplN2P3	-1.68144	9	0.126974		-31.3304	4.61354	-13.3584	Paired t-test	-0.936289
dB_deltaPower	-2.61451	9	0.0280623	*	-10.2372	-0.739672	-5.48844	Paired t-test	-1.34224
dB_thetaPower	-2.71459	9	0.0238178	*	-10.2887	-0.935338	-5.612	Paired t-test	-1.37904
dB_alphaPower	-2.77627	9	0.0215317	*	-10.4626	-1.06758	-5.7651	Paired t-test	-1.39994
dB_betaPower	-2.63918	9	0.0269498	*	-12.2874	-0.945183	-6.61627	Paired t-test	-1.34949
dB_gammaPower	-1.24471	9	0.244676		-9.30393	2.69936	-3.30228	Paired t-test	-0.615577
Time_deltaPower	0.724706	9	0.487045		-64.4931	125.293	30.4	Paired t-test	0.329373
Freq_deltaPower	0.0402347	9	0.968784		-0.970734	1.00589	0.0175781	Paired t-test	0.0190296
Time_thetaPower	1.36628	9	0.205014		-34.1003	138.11	52.005	Paired t-test	0.565395
Freq_thetaPower	-1.24579	9	0.244295		-0.732146	0.212127	-0.26001	Paired t-test	-0.372681
Time_alphaPower	1.36141	9	0.206488		-37.0161	148.911	55.9473	Paired t-test	0.616804
Freq_alphaPower	-1.22709	9	0.250917		-1.29436	0.383964	-0.4552	Paired t-test	-0.491353
Time_betaPower	1.40379	9	0.193934		-34.0743	145.525	55.7252	Paired t-test	0.643239
Freq_betaPower	1.5	9	0.167851		-1.98567e-15	9.80164e-15	3.90799e-15	Paired t-test	0.670128
Time_gammaPower	2.97489	9	0.0155783	*	53.1252	390.356	221.74	Paired t-test	1.38439
Freq_gammaPower	2.37009	9	0.0419026	*	0.114658	4.92074	2.5177	Paired t-test	1.05994

## Sheet: Channel_PC_Comparison
Variable	t_value	df	p_value	sig	conf_interval_low	conf_interval_high	estimate_mean_diff	hypothesis	cohens_d
LatP1	1.32349	9	0.218305		-2.03078	7.75744	2.86333	Paired t-test	0.567184
LatN1	2.85834	9	0.0188314	*	2.26381	19.4435	10.8537	Paired t-test	1.20718
LatP2	1.12786	9	0.288549		-9.63944	28.8088	9.58467	Paired t-test	0.482845
LatN2	1.60463	9	0.143038		-7.04742	41.4448	17.1987	Paired t-test	0.746466
LatP3	-2.63312	9	0.0272191	*	-171.094	-12.9655	-92.0297	Paired t-test	-1.4654
AmplP1N1	-3.23537	9	0.0102343	*	-59.0659	-10.4562	-34.761	Paired t-test	-1.55727
AmplN1P2	-1.84298	9	0.0984442		-32.8534	3.35467	-14.7493	Paired t-test	-0.824041
AmplP2N2	-1.62345	9	0.138942		-8.72826	1.43474	-3.64676	Paired t-test	-0.696027
AmplN2P3	-3.04384	9	0.013931	*	-23.0372	-3.39386	-13.2155	Paired t-test	-1.58663
dB_deltaPower	-3.36801	9	0.00828312	*	-8.35286	-1.64063	-4.99674	Paired t-test	-1.44741
dB_thetaPower	-3.49765	9	0.00674839	*	-8.49955	-1.82318	-5.16136	Paired t-test	-1.48432
dB_alphaPower	-3.37291	9	0.00821887	*	-8.86994	-1.7484	-5.30917	Paired t-test	-1.50001
dB_betaPower	-3.18591	9	0.0110791	*	-10.0316	-1.70092	-5.86628	Paired t-test	-1.45231
dB_gammaPower	-3.59204	9	0.00582023	*	-12.3761	-2.81143	-7.59375	Paired t-test	-1.61921
Time_deltaPower	-0.113313	9	0.91227		-58.7511	53.1461	-2.8025	Paired t-test	-0.0499263
Freq_deltaPower	0.0201105	9	0.984394		-0.979861	0.997439	0.00878906	Paired t-test	0.00953931
Time_thetaPower	1.45459	9	0.179754		-7.30249	33.6088	13.1531	Paired t-test	0.643417
Freq_thetaPower	-1.88237	9	0.0924566		-1.17802	0.10795	-0.535034	Paired t-test	-0.837104
Time_alphaPower	1.09064	9	0.303767		-61.1186	174.917	56.8994	Paired t-test	0.487649
Freq_alphaPower	-0.328382	9	0.750134		-1.32387	0.988236	-0.167816	Paired t-test	-0.130313
Time_betaPower	1.03693	9	0.326826		-65.2915	175.806	55.257	Paired t-test	0.463034
Freq_betaPower	-1.01107	9	0.338392		-3.05402	1.1673	-0.943359	Paired t-test	-0.452668
Time_gammaPower	4.10459	9	0.0026584	*	99.7829	344.812	222.297	Paired t-test	1.82557
Freq_gammaPower	1.46572	9	0.176769		-0.766804	3.58919	1.41119	Paired t-test	0.655492

## Sheet: Channel_MC_Comparison
Variable	t_value	df	p_value	sig	conf_interval_low	conf_interval_high	estimate_mean_diff	hypothesis	cohens_d
LatP1	1.19873	9	0.261243		-2.13672	6.95386	2.40857	Paired t-test	0.506411
LatN1	0.709762	9	0.495828		-7.58815	14.5268	3.46933	Paired t-test	0.376706
LatP2	0.624262	9	0.547951		-23.7011	41.7677	9.03333	Paired t-test	0.342446
LatN2	1.20887	9	0.257513		-17.4937	57.6491	20.0777	Paired t-test	0.642181
LatP3	-0.716117	9	0.492081		-112.144	58.2146	-26.9647	Paired t-test	-0.364437
AmplP1N1	-3.6764	9	0.00510393	*	-60.4875	-14.4048	-37.4462	Paired t-test	-1.78107
AmplN1P2	-1.96788	9	0.0806172		-28.1364	1.95744	-13.0895	Paired t-test	-0.671907
AmplP2N2	-0.550498	9	0.595375		-7.95752	4.8426	-1.55746	Paired t-test	-0.26609
AmplN2P3	-2.36719	9	0.0421026	*	-28.902	-0.65572	-14.7788	Paired t-test	-1.21862
dB_deltaPower	-3.73124	9	0.00468847	*	-9.8607	-2.41703	-6.13887	Paired t-test	-1.68423
dB_thetaPower	-4.46323	9	0.00156991	*	-10.8061	-3.53661	-7.17136	Paired t-test	-2.01
dB_alphaPower	-4.60079	9	0.00128907	*	-10.7389	-3.65942	-7.19916	Paired t-test	-2.00986
dB_betaPower	-4.59908	9	0.00129221	*	-11.9119	-4.05717	-7.98452	Paired t-test	-1.96786
dB_gammaPower	-2.67118	9	0.0255728	*	-9.56805	-0.793292	-5.18067	Paired t-test	-1.15233
Time_deltaPower	1.91172	9	0.0882182		-20.8933	248.851	113.979	Paired t-test	0.821591
Freq_deltaPower	-1	9	0.343436		-0.95571	0.369773	-0.292969	Paired t-test	-0.447214
Time_thetaPower	1.46133	9	0.177941		-36.092	167.812	65.8598	Paired t-test	0.672524
Freq_thetaPower	-2.36987	9	0.0419181	*	-1.58008	-0.0367422	-0.808411	Paired t-test	-0.993578
Time_alphaPower	1.32434	9	0.218035		-42.3395	161.919	59.7896	Paired t-test	0.61213
Freq_alphaPower	1.06817	9	0.313254		-0.599688	1.67269	0.536499	Paired t-test	0.494622
Time_betaPower	1.38932	9	0.198143		-54.8708	229.551	87.3401	Paired t-test	0.633313
Freq_betaPower	1.01107	9	0.33839		-0.205953	0.538839	0.166443	Paired t-test	0.452166
Time_gammaPower	3.27407	9	0.00961999	*	68.8201	376.519	222.669	Paired t-test	1.44551
Freq_gammaPower	1.4226	9	0.188572		-0.687585	3.01779	1.1651	Paired t-test	0.636208

## Sheet: Channel_FL_Comparison
Variable	t_value	df	p_value	sig	conf_interval_low	conf_interval_high	estimate_mean_diff	hypothesis	cohens_d
LatP1	1.81044	9	0.103662		-0.934977	8.42964	3.74733	Paired t-test	0.783305
LatN1	2.26581	9	0.049702	*	0.0152987	18.9434	9.47933	Paired t-test	1.01685
LatP2	1.16789	9	0.272859		-16.0827	50.412	17.1647	Paired t-test	0.633674
LatN2	0.960341	9	0.361972		-27.2371	67.4225	20.0927	Paired t-test	0.544929
LatP3	-0.955394	9	0.364335		-163.622	66.4529	-48.5847	Paired t-test	-0.545647
AmplP1N1	-3.83147	9	0.00401867	*	-71.8728	-18.5096	-45.1912	Paired t-test	-1.98199
AmplN1P2	-2.23479	9	0.0522866		-51.9641	0.316292	-25.8239	Paired t-test	-1.04237
AmplP2N2	-1.24572	9	0.24432		-8.13042	2.35586	-2.88728	Paired t-test	-0.633023
AmplN2P3	-1.81574	9	0.102795		-31.1347	3.40837	-13.8632	Paired t-test	-1.05556
dB_deltaPower	-3.93498	9	0.00343202	*	-11.3138	-3.05398	-7.18389	Paired t-test	-1.84716
dB_thetaPower	-4.11401	9	0.00262127	*	-11.4273	-3.31886	-7.37306	Paired t-test	-2.00758
dB_alphaPower	-4.23337	9	0.00219567	*	-11.5927	-3.51807	-7.5554	Paired t-test	-2.06189
dB_betaPower	-4.2117	9	0.00226709	*	-12.3218	-3.71061	-8.01622	Paired t-test	-2.06061
dB_gammaPower	-2.7965	9	0.0208315	*	-9.15421	-0.966949	-5.06058	Paired t-test	-1.2618
Time_deltaPower	0.345817	9	0.737426		-80.3148	109.302	14.4934	Paired t-test	0.158286
Freq_deltaPower	0.120358	9	0.906843		-0.938418	1.04389	0.0527344	Paired t-test	0.0572888
Time_thetaPower	0.93034	9	0.376475		-54.5166	130.682	38.0825	Paired t-test	0.43203
Freq_thetaPower	-0.72573	9	0.486446		-0.737275	0.37912	-0.179077	Paired t-test	-0.349995
Time_alphaPower	0.958758	9	0.362727		-52.3377	129.335	38.4987	Paired t-test	0.444211
Freq_alphaPower	-0.077514	9	0.939911		-0.823497	0.768932	-0.0272827	Paired t-test	-0.0386633
Time_betaPower	1.03736	9	0.326633		-45.7137	123.15	38.7181	Paired t-test	0.478247
Freq_betaPower	1.5	9	0.167851		-1.98567e-15	9.80164e-15	3.90799e-15	Paired t-test	0.670128
Time_gammaPower	3.25658	9	0.00989266	*	63.8416	354.301	209.071	Paired t-test	1.50499
Freq_gammaPower	1.91745	9	0.0874123		-0.386777	4.68976	2.15149	Paired t-test	0.857511

## Sheet: Channel_ML_Comparison
Variable	t_value	df	p_value	sig	conf_interval_low	conf_interval_high	estimate_mean_diff	hypothesis	cohens_d
LatP1	1.82378	9	0.101493		-0.724873	6.75621	3.01567	Paired t-test	0.794071
LatN1	2.1613	9	0.058943		-0.46776	20.5144	10.0233	Paired t-test	1.06966
LatP2	0.796423	9	0.446285		-21.8983	45.6956	11.8987	Paired t-test	0.448258
LatN2	1.70181	9	0.122998		-9.12889	64.5796	27.7253	Paired t-test	0.926253
LatP3	-0.838976	9	0.423206		-133.051	61.06	-35.9953	Paired t-test	-0.424436
AmplP1N1	-3.28428	9	0.00946431	*	-74.9403	-13.8104	-44.3754	Paired t-test	-1.49297
AmplN1P2	-2.45652	9	0.0363657	*	-43.7258	-1.80107	-22.7634	Paired t-test	-0.974589
AmplP2N2	-1.27214	9	0.235207		-6.45235	1.80741	-2.32247	Paired t-test	-0.524734
AmplN2P3	-1.19026	9	0.264394		-29.743	9.23455	-10.2542	Paired t-test	-0.675947
dB_deltaPower	-3.64847	9	0.00533016	*	-10.7467	-2.5206	-6.63366	Paired t-test	-1.40888
dB_thetaPower	-4.00102	9	0.00310565	*	-11.7143	-3.25226	-7.48326	Paired t-test	-1.61387
dB_alphaPower	-4.10748	9	0.00264694	*	-12.4756	-3.61426	-8.04493	Paired t-test	-1.69369
dB_betaPower	-4.03566	9	0.00294779	*	-13.9458	-3.92721	-8.9365	Paired t-test	-1.72002
dB_gammaPower	-4.04888	9	0.00288976	*	-11.0967	-3.1416	-7.11914	Paired t-test	-1.5784
Time_deltaPower	1.77738	9	0.109228		-21.7875	181.548	79.8803	Paired t-test	0.742089
Freq_deltaPower	0.100491	9	0.922157		-0.945307	1.0332	0.0439453	Paired t-test	0.0477637
Time_thetaPower	2.02543	9	0.0734744		-15.3811	278.586	131.603	Paired t-test	0.920689
Freq_thetaPower	-3.86325	9	0.00382801	*	-2.294	-0.599618	-1.44681	Paired t-test	-1.79136
Time_alphaPower	1.97117	9	0.0801914		-18.8332	273.985	127.576	Paired t-test	0.899028
Freq_alphaPower	-1.93433	9	0.0850799		-1.52105	0.118824	-0.701111	Paired t-test	-0.82451
Time_betaPower	1.46148	9	0.177901		-32.4829	151.066	59.2914	Paired t-test	0.669786
Freq_betaPower	1.07575	9	0.310031		-0.248489	0.699112	0.225311	Paired t-test	0.481089
Time_gammaPower	4.84167	9	0.000918893	*	176.931	487.257	332.094	Paired t-test	2.14831
Freq_gammaPower	1.86974	9	0.0943383		-0.37898	3.99037	1.80569	Paired t-test	0.836171

## Sheet: Channel_PL_Comparison
Variable	t_value	df	p_value	sig	conf_interval_low	conf_interval_high	estimate_mean_diff	hypothesis	cohens_d
LatP1	0.155767	9	0.879655		-5.09806	5.85206	0.377	Paired t-test	0.0671336
LatN1	3.12192	9	0.0122807	*	3.66706	22.9643	13.3157	Paired t-test	1.69315
LatP2	0.800952	9	0.443789		-21.5691	45.2151	11.823	Paired t-test	0.446819
LatN2	0.762898	9	0.465049		-28.7255	57.9595	14.617	Paired t-test	0.433832
LatP3	-1.06767	9	0.313469		-148.187	53.1579	-47.5143	Paired t-test	-0.58143
AmplP1N1	-2.77114	9	0.0217129	*	-60.2394	-6.09164	-33.1655	Paired t-test	-1.45804
AmplN1P2	-2.86507	9	0.0186259	*	-31.259	-3.67574	-17.4674	Paired t-test	-1.10536
AmplP2N2	-2.42034	9	0.0385891	*	-8.28875	-0.28001	-4.28438	Paired t-test	-1.07668
AmplN2P3	-1.13098	9	0.287299		-21.3947	7.13238	-7.13116	Paired t-test	-0.656733
dB_deltaPower	-2.17883	9	0.0572831		-9.30282	0.17454	-4.56414	Paired t-test	-1.23673
dB_thetaPower	-2.36294	9	0.042397	*	-10.0391	-0.218746	-5.12891	Paired t-test	-1.34438
dB_alphaPower	-2.62665	9	0.0275094	*	-10.5724	-0.78824	-5.68032	Paired t-test	-1.46978
dB_betaPower	-2.98002	9	0.0154492	*	-12.0451	-1.64945	-6.84728	Paired t-test	-1.61225
dB_gammaPower	-4.57035	9	0.00134622	*	-12.6882	-4.28639	-8.48728	Paired t-test	-1.84401
Time_deltaPower	1.19776	9	0.261602		-46.951	152.618	52.8337	Paired t-test	0.522879
Freq_deltaPower	-1.48068	9	0.172827		-1.35638	0.283203	-0.536591	Paired t-test	-0.612456
Time_thetaPower	0.110545	9	0.914403		-142.936	157.624	7.34373	Paired t-test	0.0529581
Freq_thetaPower	-1.85613	9	0.0964057		-1.14404	0.112793	-0.515625	Paired t-test	-0.845756
Time_alphaPower	1.27954	9	0.232707		-41.8472	150.832	54.4924	Paired t-test	0.58577
Freq_alphaPower	-5.02561	9	0.000713615	*	-2.62419	-0.99507	-1.80963	Paired t-test	-2.04132
Time_betaPower	1.50305	9	0.167077		-46.5876	231.076	92.2441	Paired t-test	0.675929
Freq_betaPower	-0.857778	9	0.413274		-3.20211	1.44137	-0.880371	Paired t-test	-0.413314
Time_gammaPower	2.73082	9	0.0231935	*	33.7858	359.945	196.865	Paired t-test	1.08072
Freq_gammaPower	1.79219	9	0.1067		-0.536332	4.62691	2.04529	Paired t-test	0.649443
