# Supplementary material for: Chronic alcohol-induced brain states limit propagation of direct cortical stimulation
Source: Sci Rep. 2025 Oct 10;15:35407. doi: 10.1038/s41598-025-21802-z (PMC12514308; doi:10.1038/s41598-025-21802-z)
Supplement: Supplementary file 13 — Supplementary Material 13 [file 41598_2025_21802_MOESM13_ESM.xlsx]

## Sheet: LatP1_All_Channels
.y.	group1	group2	n1	n2	statistic	df	p	p.adj	p.adj.signif
LatP1	PR	MR	10	10	-2.36771	9	0.042	0.408	ns
LatP1	PR	FR	10	10	0.586871	9	0.572	0.686	ns
LatP1	PR	FC	10	10	0.998416	9	0.344	0.593	ns
LatP1	PR	PC	10	10	-0.659054	9	0.526	0.667	ns
LatP1	PR	MC	10	10	-2.72614	9	0.023	0.408	ns
LatP1	PR	FL	10	10	-2.32278	9	0.045	0.408	ns
LatP1	PR	ML	10	10	-1.64086	9	0.135	0.591	ns
LatP1	PR	PL	10	10	-0.860163	9	0.412	0.593	ns
LatP1	MR	FR	10	10	0.921098	9	0.381	0.593	ns
LatP1	MR	FC	10	10	1.35291	9	0.209	0.591	ns
LatP1	MR	PC	10	10	0.249932	9	0.808	0.909	ns
LatP1	MR	MC	10	10	-0.993773	9	0.346	0.593	ns
LatP1	MR	FL	10	10	-1.33807	9	0.214	0.591	ns
LatP1	MR	ML	10	10	-0.641626	9	0.537	0.667	ns
LatP1	MR	PL	10	10	0.076164	9	0.941	0.967	ns
LatP1	FR	FC	10	10	4.28554	9	0.002	0.073	ns
LatP1	FR	PC	10	10	-0.88162	9	0.401	0.593	ns
LatP1	FR	MC	10	10	-1.03196	9	0.329	0.593	ns
LatP1	FR	FL	10	10	-1.13566	9	0.285	0.593	ns
LatP1	FR	ML	10	10	-1.02869	9	0.33	0.593	ns
LatP1	FR	PL	10	10	-0.873299	9	0.405	0.593	ns
LatP1	FC	PC	10	10	-1.32505	9	0.218	0.591	ns
LatP1	FC	MC	10	10	-1.43715	9	0.185	0.591	ns
LatP1	FC	FL	10	10	-1.57812	9	0.149	0.591	ns
LatP1	FC	ML	10	10	-1.43886	9	0.184	0.591	ns
LatP1	FC	PL	10	10	-1.28872	9	0.23	0.591	ns
LatP1	PC	MC	10	10	-0.946436	9	0.369	0.593	ns
LatP1	PC	FL	10	10	-0.956599	9	0.364	0.593	ns
LatP1	PC	ML	10	10	-1.40713	9	0.193	0.591	ns
LatP1	PC	PL	10	10	-0.51161	9	0.621	0.721	ns
LatP1	MC	FL	10	10	-0.0892953	9	0.931	0.967	ns
LatP1	MC	ML	10	10	0.0421683	9	0.967	0.967	ns
LatP1	MC	PL	10	10	0.75986	9	0.467	0.641	ns
LatP1	FL	ML	10	10	0.102014	9	0.921	0.967	ns
LatP1	FL	PL	10	10	0.734509	9	0.481	0.641	ns
LatP1	ML	PL	10	10	1.5771	9	0.149	0.591	ns

## Sheet: LatP1_FC_vs_Others
.y.	group1	group2	n1	n2	statistic	df	p	p.adj	p.adj.signif
LatP1	PR	FC	10	10	0.998416	9	0.344	0.344	ns
LatP1	MR	FC	10	10	1.35291	9	0.209	0.263	ns
LatP1	FR	FC	10	10	4.28554	9	0.002	0.016	*
LatP1	FC	PC	10	10	-1.32505	9	0.218	0.263	ns
LatP1	FC	MC	10	10	-1.43715	9	0.185	0.263	ns
LatP1	FC	FL	10	10	-1.57812	9	0.149	0.263	ns
LatP1	FC	ML	10	10	-1.43886	9	0.184	0.263	ns
LatP1	FC	PL	10	10	-1.28872	9	0.23	0.263	ns

## Sheet: LatN1_All_Channels
.y.	group1	group2	n1	n2	statistic	df	p	p.adj	p.adj.signif
LatN1	PR	MR	10	10	-1.30181	9	0.225	0.598	ns
LatN1	PR	FR	10	10	0.194137	9	0.85	0.874	ns
LatN1	PR	FC	10	10	0.822889	9	0.432	0.739	ns
LatN1	PR	PC	10	10	1.3113	9	0.222	0.598	ns
LatN1	PR	MC	10	10	-0.475895	9	0.645	0.774	ns
LatN1	PR	FL	10	10	-1.04471	9	0.323	0.726	ns
LatN1	PR	ML	10	10	-0.730545	9	0.484	0.739	ns
LatN1	PR	PL	10	10	-1.38416	9	0.2	0.598	ns
LatN1	MR	FR	10	10	0.581444	9	0.575	0.739	ns
LatN1	MR	FC	10	10	1.3381	9	0.214	0.598	ns
LatN1	MR	PC	10	10	1.81237	9	0.103	0.598	ns
LatN1	MR	MC	10	10	0.665065	9	0.523	0.739	ns
LatN1	MR	FL	10	10	-0.645899	9	0.534	0.739	ns
LatN1	MR	ML	10	10	-0.308812	9	0.764	0.809	ns
LatN1	MR	PL	10	10	-0.958819	9	0.363	0.726	ns
LatN1	FR	FC	10	10	0.517372	9	0.617	0.766	ns
LatN1	FR	PC	10	10	0.366911	9	0.722	0.809	ns
LatN1	FR	MC	10	10	-0.358733	9	0.728	0.809	ns
LatN1	FR	FL	10	10	-0.728463	9	0.485	0.739	ns
LatN1	FR	ML	10	10	-0.73285	9	0.482	0.739	ns
LatN1	FR	PL	10	10	-1.27471	9	0.234	0.598	ns
LatN1	FC	PC	10	10	-0.317193	9	0.758	0.809	ns
LatN1	FC	MC	10	10	-0.975884	9	0.355	0.726	ns
LatN1	FC	FL	10	10	-1.50834	9	0.166	0.598	ns
LatN1	FC	ML	10	10	-1.23347	9	0.249	0.598	ns
LatN1	FC	PL	10	10	-1.91716	9	0.088	0.598	ns
LatN1	PC	MC	10	10	-1.59854	9	0.144	0.598	ns
LatN1	PC	FL	10	10	-1.5678	9	0.151	0.598	ns
LatN1	PC	ML	10	10	-1.49818	9	0.168	0.598	ns
LatN1	PC	PL	10	10	-2.3259	9	0.045	0.598	ns
LatN1	MC	FL	10	10	-0.746377	9	0.474	0.739	ns
LatN1	MC	ML	10	10	-0.588648	9	0.571	0.739	ns
LatN1	MC	PL	10	10	-1.24707	9	0.244	0.598	ns
LatN1	FL	ML	10	10	-0.0916504	9	0.929	0.929	ns
LatN1	FL	PL	10	10	-0.644238	9	0.535	0.739	ns
LatN1	ML	PL	10	10	-1.54366	9	0.157	0.598	ns

## Sheet: LatN1_FC_vs_Others
.y.	group1	group2	n1	n2	statistic	df	p	p.adj	p.adj.signif
LatN1	PR	FC	10	10	0.822889	9	0.432	0.576	ns
LatN1	MR	FC	10	10	1.3381	9	0.214	0.498	ns
LatN1	FR	FC	10	10	0.517372	9	0.617	0.705	ns
LatN1	FC	PC	10	10	-0.317193	9	0.758	0.758	ns
LatN1	FC	MC	10	10	-0.975884	9	0.355	0.568	ns
LatN1	FC	FL	10	10	-1.50834	9	0.166	0.498	ns
LatN1	FC	ML	10	10	-1.23347	9	0.249	0.498	ns
LatN1	FC	PL	10	10	-1.91716	9	0.088	0.498	ns

## Sheet: LatP2_All_Channels
.y.	group1	group2	n1	n2	statistic	df	p	p.adj	p.adj.signif
LatP2	PR	MR	10	10	-1.26363	9	0.238	0.428	ns
LatP2	PR	FR	10	10	-2.72897	9	0.023	0.368	ns
LatP2	PR	FC	10	10	-0.0242737	9	0.981	0.981	ns
LatP2	PR	PC	10	10	0.283909	9	0.783	0.805	ns
LatP2	PR	MC	10	10	-0.612725	9	0.555	0.689	ns
LatP2	PR	FL	10	10	-2.2509	9	0.051	0.374	ns
LatP2	PR	ML	10	10	-1.61282	9	0.141	0.379	ns
LatP2	PR	PL	10	10	-2.21101	9	0.054	0.374	ns
LatP2	MR	FR	10	10	-1.58272	9	0.148	0.379	ns
LatP2	MR	FC	10	10	0.579711	9	0.576	0.691	ns
LatP2	MR	PC	10	10	0.866989	9	0.408	0.575	ns
LatP2	MR	MC	10	10	0.482404	9	0.641	0.724	ns
LatP2	MR	FL	10	10	-1.28059	9	0.232	0.428	ns
LatP2	MR	ML	10	10	-0.793891	9	0.448	0.597	ns
LatP2	MR	PL	10	10	-1.84833	9	0.098	0.379	ns
LatP2	FR	FC	10	10	1.46186	9	0.178	0.379	ns
LatP2	FR	PC	10	10	1.85715	9	0.096	0.379	ns
LatP2	FR	MC	10	10	1.66917	9	0.129	0.379	ns
LatP2	FR	FL	10	10	1.45822	9	0.179	0.379	ns
LatP2	FR	ML	10	10	0.626675	9	0.546	0.689	ns
LatP2	FR	PL	10	10	-1.29604	9	0.227	0.428	ns
LatP2	FC	PC	10	10	0.449663	9	0.664	0.724	ns
LatP2	FC	MC	10	10	-0.351429	9	0.733	0.776	ns
LatP2	FC	FL	10	10	-0.853638	9	0.415	0.575	ns
LatP2	FC	ML	10	10	-1.03367	9	0.328	0.513	ns
LatP2	FC	PL	10	10	-2.12649	9	0.062	0.374	ns
LatP2	PC	MC	10	10	-0.858896	9	0.413	0.575	ns
LatP2	PC	FL	10	10	-1.21022	9	0.257	0.441	ns
LatP2	PC	ML	10	10	-1.63006	9	0.138	0.379	ns
LatP2	PC	PL	10	10	-3.09856	9	0.013	0.368	ns
LatP2	MC	FL	10	10	-1.11398	9	0.294	0.481	ns
LatP2	MC	ML	10	10	-1.47928	9	0.173	0.379	ns
LatP2	MC	PL	10	10	-2.56056	9	0.031	0.368	ns
LatP2	FL	ML	10	10	-0.466151	9	0.652	0.724	ns
LatP2	FL	PL	10	10	-1.78747	9	0.108	0.379	ns
LatP2	ML	PL	10	10	-1.73275	9	0.117	0.379	ns

## Sheet: LatP2_FC_vs_Others
.y.	group1	group2	n1	n2	statistic	df	p	p.adj	p.adj.signif
LatP2	PR	FC	10	10	-0.0242737	9	0.981	0.981	ns
LatP2	MR	FC	10	10	0.579711	9	0.576	0.838	ns
LatP2	FR	FC	10	10	1.46186	9	0.178	0.712	ns
LatP2	FC	PC	10	10	0.449663	9	0.664	0.838	ns
LatP2	FC	MC	10	10	-0.351429	9	0.733	0.838	ns
LatP2	FC	FL	10	10	-0.853638	9	0.415	0.83	ns
LatP2	FC	ML	10	10	-1.03367	9	0.328	0.83	ns
LatP2	FC	PL	10	10	-2.12649	9	0.062	0.499	ns

## Sheet: LatN2_All_Channels
.y.	group1	group2	n1	n2	statistic	df	p	p.adj	p.adj.signif
LatN2	PR	MR	10	10	0.889153	9	0.397	0.497	ns
LatN2	PR	FR	10	10	-0.166563	9	0.871	0.896	ns
LatN2	PR	FC	10	10	1.68602	9	0.126	0.383	ns
LatN2	PR	PC	10	10	-1.20007	9	0.261	0.421	ns
LatN2	PR	MC	10	10	-1.63413	9	0.137	0.383	ns
LatN2	PR	FL	10	10	-0.909149	9	0.387	0.497	ns
LatN2	PR	ML	10	10	-1.40832	9	0.193	0.383	ns
LatN2	PR	PL	10	10	-1.37482	9	0.202	0.383	ns
LatN2	MR	FR	10	10	-1.37727	9	0.202	0.383	ns
LatN2	MR	FC	10	10	0.7408	9	0.478	0.574	ns
LatN2	MR	PC	10	10	-1.61318	9	0.141	0.383	ns
LatN2	MR	MC	10	10	-1.85437	9	0.097	0.383	ns
LatN2	MR	FL	10	10	-1.24321	9	0.245	0.421	ns
LatN2	MR	ML	10	10	-1.75871	9	0.112	0.383	ns
LatN2	MR	PL	10	10	-1.87625	9	0.093	0.383	ns
LatN2	FR	FC	10	10	1.4293	9	0.187	0.383	ns
LatN2	FR	PC	10	10	-1.38421	9	0.2	0.383	ns
LatN2	FR	MC	10	10	-1.45597	9	0.179	0.383	ns
LatN2	FR	FL	10	10	-0.925586	9	0.379	0.497	ns
LatN2	FR	ML	10	10	-1.61095	9	0.142	0.383	ns
LatN2	FR	PL	10	10	-1.65244	9	0.133	0.383	ns
LatN2	FC	PC	10	10	-2.04632	9	0.071	0.383	ns
LatN2	FC	MC	10	10	-2.21239	9	0.054	0.383	ns
LatN2	FC	FL	10	10	-1.44147	9	0.183	0.383	ns
LatN2	FC	ML	10	10	-2.04509	9	0.071	0.383	ns
LatN2	FC	PL	10	10	-2.22387	9	0.053	0.383	ns
LatN2	PC	MC	10	10	-0.606919	9	0.559	0.649	ns
LatN2	PC	FL	10	10	0.0844977	9	0.935	0.935	ns
LatN2	PC	ML	10	10	-1.21329	9	0.256	0.421	ns
LatN2	PC	PL	10	10	-0.891066	9	0.396	0.497	ns
LatN2	MC	FL	10	10	0.882889	9	0.4	0.497	ns
LatN2	MC	ML	10	10	-0.279231	9	0.786	0.832	ns
LatN2	MC	PL	10	10	0.355529	9	0.73	0.819	ns
LatN2	FL	ML	10	10	-1.17807	9	0.269	0.421	ns
LatN2	FL	PL	10	10	-0.327389	9	0.751	0.819	ns
LatN2	ML	PL	10	10	0.940344	9	0.372	0.497	ns

## Sheet: LatN2_FC_vs_Others
.y.	group1	group2	n1	n2	statistic	df	p	p.adj	p.adj.signif
LatN2	PR	FC	10	10	1.68602	9	0.126	0.202	ns
LatN2	MR	FC	10	10	0.7408	9	0.478	0.478	ns
LatN2	FR	FC	10	10	1.4293	9	0.187	0.214	ns
LatN2	FC	PC	10	10	-2.04632	9	0.071	0.142	ns
LatN2	FC	MC	10	10	-2.21239	9	0.054	0.142	ns
LatN2	FC	FL	10	10	-1.44147	9	0.183	0.214	ns
LatN2	FC	ML	10	10	-2.04509	9	0.071	0.142	ns
LatN2	FC	PL	10	10	-2.22387	9	0.053	0.142	ns

## Sheet: LatP3_All_Channels
.y.	group1	group2	n1	n2	statistic	df	p	p.adj	p.adj.signif
LatP3	PR	MR	10	10	2.11991	9	0.063	0.245	ns
LatP3	PR	FR	10	10	-2.50895	9	0.033	0.245	ns
LatP3	PR	FC	10	10	0.0263462	9	0.98	0.98	ns
LatP3	PR	PC	10	10	-1.39397	9	0.197	0.362	ns
LatP3	PR	MC	10	10	-0.626651	9	0.546	0.634	ns
LatP3	PR	FL	10	10	-0.0548851	9	0.957	0.98	ns
LatP3	PR	ML	10	10	-0.708102	9	0.497	0.634	ns
LatP3	PR	PL	10	10	-1.6446	9	0.134	0.302	ns
LatP3	MR	FR	10	10	-3.28568	9	0.009	0.245	ns
LatP3	MR	FC	10	10	-0.9452	9	0.369	0.553	ns
LatP3	MR	PC	10	10	-2.59832	9	0.029	0.245	ns
LatP3	MR	MC	10	10	-1.95447	9	0.082	0.245	ns
LatP3	MR	FL	10	10	-1.32332	9	0.218	0.374	ns
LatP3	MR	ML	10	10	-1.88268	9	0.092	0.245	ns
LatP3	MR	PL	10	10	-2.46485	9	0.036	0.245	ns
LatP3	FR	FC	10	10	2.6852	9	0.025	0.245	ns
LatP3	FR	PC	10	10	1.38755	9	0.199	0.362	ns
LatP3	FR	MC	10	10	1.80006	9	0.105	0.252	ns
LatP3	FR	FL	10	10	2.30923	9	0.046	0.245	ns
LatP3	FR	ML	10	10	1.97121	9	0.08	0.245	ns
LatP3	FR	PL	10	10	0.797042	9	0.446	0.618	ns
LatP3	FC	PC	10	10	-1.98655	9	0.078	0.245	ns
LatP3	FC	MC	10	10	-0.460321	9	0.656	0.738	ns
LatP3	FC	FL	10	10	-0.057749	9	0.955	0.98	ns
LatP3	FC	ML	10	10	-0.635852	9	0.541	0.634	ns
LatP3	FC	PL	10	10	-2.04406	9	0.071	0.245	ns
LatP3	PC	MC	10	10	0.830419	9	0.428	0.616	ns
LatP3	PC	FL	10	10	1.37925	9	0.201	0.362	ns
LatP3	PC	ML	10	10	1.15046	9	0.28	0.438	ns
LatP3	PC	PL	10	10	-0.688213	9	0.509	0.634	ns
LatP3	MC	FL	10	10	1.56431	9	0.152	0.322	ns
LatP3	MC	ML	10	10	0.0287781	9	0.978	0.98	ns
LatP3	MC	PL	10	10	-1.21005	9	0.257	0.421	ns
LatP3	FL	ML	10	10	-0.662604	9	0.524	0.634	ns
LatP3	FL	PL	10	10	-1.86328	9	0.095	0.245	ns
LatP3	ML	PL	10	10	-2.23954	9	0.052	0.245	ns

## Sheet: LatP3_FC_vs_Others
.y.	group1	group2	n1	n2	statistic	df	p	p.adj	p.adj.signif
LatP3	PR	FC	10	10	0.0263462	9	0.98	0.98	ns
LatP3	MR	FC	10	10	-0.9452	9	0.369	0.738	ns
LatP3	FR	FC	10	10	2.6852	9	0.025	0.2	ns
LatP3	FC	PC	10	10	-1.98655	9	0.078	0.209	ns
LatP3	FC	MC	10	10	-0.460321	9	0.656	0.875	ns
LatP3	FC	FL	10	10	-0.057749	9	0.955	0.98	ns
LatP3	FC	ML	10	10	-0.635852	9	0.541	0.866	ns
LatP3	FC	PL	10	10	-2.04406	9	0.071	0.209	ns

[truncated: 38 more sheets: AmplP1N1_All_Channels, AmplP1N1_FC_vs_Others, AmplN1P2_All_Channels, AmplN1P2_FC_vs_Others, AmplP2N2_All_Channels, AmplP2N2_FC_vs_Others, AmplN2P3_All_Channels, AmplN2P3_FC_vs_Others, dB_deltaPower_All_Channels, dB_deltaPower_FC_vs_Others, dB_thetaPower_All_Channels, dB_thetaPower_FC_vs_Others, dB_alphaPower_All_Channels, dB_alphaPower_FC_vs_Others, dB_betaPower_All_Channels, dB_betaPower_FC_vs_Others, dB_gammaPower_All_Channels, dB_gammaPower_FC_vs_Others, Time_deltaPower_All_Channels, Time_deltaPower_FC_vs_Others …]
