# Supplementary material for: Chronic alcohol-induced brain states limit propagation of direct cortical stimulation
Source: Sci Rep. 2025 Oct 10;15:35407. doi: 10.1038/s41598-025-21802-z (PMC12514308; doi:10.1038/s41598-025-21802-z)
Supplement: Supplementary file 14 — Supplementary Material 14 [file 41598_2025_21802_MOESM14_ESM.xlsx]

## Sheet: allChannels
Group	Parameter1	Parameter2	rho	CI_low	CI_high	S	p
Control	AmplP1N1_means_prestim	AmplP1N1_means_stim	-0.212767	-0.752531	0.49799	200.107	0.555076
	AmplN1P2_means_prestim	AmplN1P2_means_stim	-0.0121581	-0.649744	0.63547	167.006	0.973408
	AmplP2N2_means_prestim	AmplP2N2_means_stim	0.0607906	-0.605529	0.677004	154.97	0.867511
	AmplN2P3_means_prestim	AmplN2P3_means_stim	-0.729487	-0.934189	-0.163453	285.365	0.0166469
	deltapower_means_prestim	deltapower_means_stim	-0.0668696	-0.680297	0.601649	176.033	0.854375
	thetapower_means_prestim	thetapower_means_stim	0.0486324	-0.613195	0.670344	156.976	0.893868
	alphapower_means_prestim	alphapower_means_stim	0.0182372	-0.631831	0.653244	161.991	0.960119
	betapower_means_prestim	betapower_means_stim	0.0243162	-0.628163	0.656716	160.988	0.94684
	gammapower_means_prestim	gammapower_means_stim	0.121581	-0.565248	0.708857	144.939	0.737938
	Totalpower_means_prestim	Totalpower_means_stim	0.0182372	-0.631831	0.653244	161.991	0.960119
Alcohol	AmplP1N1_means_prestim	AmplP1N1_means_stim	-0.00606061	-0.646206	0.639091	166	0.986743
	AmplN1P2_means_prestim	AmplN1P2_means_stim	-0.381818	-0.822625	0.345664	228	0.276255
	AmplP2N2_means_prestim	AmplP2N2_means_stim	-0.272727	-0.778875	0.448554	210	0.445838
	AmplN2P3_means_prestim	AmplN2P3_means_stim	-0.115152	-0.705598	0.569669	184	0.75142
	deltapower_means_prestim	deltapower_means_stim	-0.236364	-0.763109	0.479071	204	0.510885
	thetapower_means_prestim	thetapower_means_stim	-0.0909091	-0.693079	0.585989	180	0.802772
	alphapower_means_prestim	alphapower_means_stim	-0.151515	-0.723708	0.544131	190	0.676065
	betapower_means_prestim	betapower_means_stim	-0.260606	-0.77369	0.458917	208	0.467089
	gammapower_means_prestim	gammapower_means_stim	0.224242	-0.488873	0.75771	128	0.533401
	Totalpower_means_prestim	Totalpower_means_stim	-0.151515	-0.723708	0.544131	190	0.676065

## Sheet: Alc_FCchannel
Group	Parameter1	Parameter2	rho	CI_low	CI_high	S	p
Alcohol	AmplP1N1_prestim	AmplP1N1_stim	0.0668696	-0.601649	0.680297	153.967	0.854375
	AmplN1P2_prestim	AmplN1P2_stim	-0.0911858	-0.693224	0.585806	180.046	0.802181
	AmplP2N2_prestim	AmplP2N2_stim	-0.176293	-0.735613	0.52596	194.088	0.626123
	AmplN2P3_prestim	AmplN2P3_stim	0.376901	-0.350711	0.820759	102.811	0.283003
	dB_deltaPower_max_prestim	dB_deltaPower_max_stim	0.261399	-0.458245	0.774031	121.869	0.465685
	dB_thetaPower_max_prestim	dB_thetaPower_max_stim	0.0303953	-0.624466	0.660162	159.985	0.933572
	dB_alphaPower_max_prestim	dB_alphaPower_max_stim	0.133739	-0.556778	0.714952	142.933	0.712622
	dB_betaPower_max_prestim	dB_betaPower_max_stim	0	-0.642663	0.642663	165	1
	dB_gammaPower_max_prestim	dB_gammaPower_max_stim	0.0790277	-0.593793	0.686809	151.96	0.828202
	dB_TotalPower_max_prestim	dB_TotalPower_max_stim	0.182372	-0.521401	0.738482	134.909	0.614068
