# Supplementary material for: Chronic alcohol-induced brain states limit propagation of direct cortical stimulation
Source: Sci Rep. 2025 Oct 10;15:35407. doi: 10.1038/s41598-025-21802-z (PMC12514308; doi:10.1038/s41598-025-21802-z)
Supplement: Supplementary file 15 — Supplementary Material 15 [file 41598_2025_21802_MOESM15_ESM.xlsx]

## Sheet: Channel_means
Parameter1	Parameter2	estimate	p.value	statistic
AmplP1N1_stim	BL_mean_Alc5	-0.194201	0.6166	-0.52378
AmplP1N1_stim	BL_mean_Alc10	-0.51019	0.16053	-1.56946
AmplP1N1_stim	BL_mean_Alc20	0.156249	0.688097	0.418537
AmplP1N1_stim	BL_mean_TotalAlc	-0.626966	0.070747	-2.12926
AmplP1N1_stim	ADE_mean_Alc5	-0.0181458	0.963044	-0.0480171
AmplP1N1_stim	ADE_mean_Alc10	-0.837904	0.00479999	-4.06158
AmplP1N1_stim	ADE_mean_Alc20	-0.139779	0.719839	-0.373488
AmplP1N1_stim	ADE_mean_TotalAlc	-0.889951	0.00130522	-5.16293
AmplP1N1_stim	Relapse_mean_Alc5	0.129512	0.73982	0.345568
AmplP1N1_stim	Relapse_mean_Alc10	-0.323726	0.395424	-0.905244
AmplP1N1_stim	Relapse_mean_Alc20	-0.376361	0.318117	-1.07478
AmplP1N1_stim	Relapse_mean_TotalAlc	-0.422238	0.25759	-1.23238
AmplN1P2_stim	BL_mean_Alc5	-0.24917	0.517929	-0.680712
AmplN1P2_stim	BL_mean_Alc10	-0.334023	0.379668	-0.937592
AmplN1P2_stim	BL_mean_Alc20	0.126638	0.745438	0.337772
AmplN1P2_stim	BL_mean_TotalAlc	-0.700035	0.0357563	-2.59361
AmplN1P2_stim	ADE_mean_Alc5	-0.360184	0.341008	-1.02152
AmplN1P2_stim	ADE_mean_Alc10	-0.592578	0.0926637	-1.94636
AmplN1P2_stim	ADE_mean_Alc20	0.0365375	0.925649	0.0967336
AmplN1P2_stim	ADE_mean_TotalAlc	-0.769735	0.0152717	-3.19023
AmplN1P2_stim	Relapse_mean_Alc5	-0.240649	0.5328	-0.655976
AmplN1P2_stim	Relapse_mean_Alc10	-0.0402426	0.918129	-0.106558
AmplN1P2_stim	Relapse_mean_Alc20	-0.136642	0.725929	-0.364944
AmplN1P2_stim	Relapse_mean_TotalAlc	-0.251643	0.513644	-0.687922
AmplP2N2_stim	BL_mean_Alc5	0.322172	0.397828	0.900394
AmplP2N2_stim	BL_mean_Alc10	-0.162188	0.67675	-0.434868
AmplP2N2_stim	BL_mean_Alc20	-0.357355	0.345092	-1.01232
AmplP2N2_stim	BL_mean_TotalAlc	0.0867293	0.82442	0.230332
AmplP2N2_stim	ADE_mean_Alc5	0.292668	0.444716	0.809783
AmplP2N2_stim	ADE_mean_Alc10	0.309979	0.416919	0.862618
AmplP2N2_stim	ADE_mean_Alc20	-0.396647	0.29054	-1.14321
AmplP2N2_stim	ADE_mean_TotalAlc	0.0757614	0.846396	0.201024
AmplP2N2_stim	Relapse_mean_Alc5	0.241015	0.532159	0.657033
AmplP2N2_stim	Relapse_mean_Alc10	-0.0584138	0.881338	-0.154813
AmplP2N2_stim	Relapse_mean_Alc20	-0.284077	0.458802	-0.783892
AmplP2N2_stim	Relapse_mean_TotalAlc	0.00344676	0.992978	0.00911931
AmplN2P3_stim	BL_mean_Alc5	-0.35381	0.350243	-1.00083
AmplN2P3_stim	BL_mean_Alc10	0.151655	0.696911	0.405937
AmplN2P3_stim	BL_mean_Alc20	0.365217	0.333801	1.03797
AmplN2P3_stim	BL_mean_TotalAlc	0.00486314	0.990093	0.0128668
AmplN2P3_stim	ADE_mean_Alc5	-0.0130931	0.973331	-0.034644
AmplN2P3_stim	ADE_mean_Alc10	-0.230012	0.551594	-0.62532
AmplN2P3_stim	ADE_mean_Alc20	-0.37355	0.322037	-1.06545
AmplN2P3_stim	ADE_mean_TotalAlc	-0.480982	0.189942	-1.45148
AmplN2P3_stim	Relapse_mean_Alc5	0.267575	0.486384	0.734729
AmplN2P3_stim	Relapse_mean_Alc10	-0.366659	0.33175	-1.04271
AmplN2P3_stim	Relapse_mean_Alc20	-0.668607	0.0489634	-2.37887
AmplN2P3_stim	Relapse_mean_TotalAlc	-0.617793	0.0762373	-2.07865
dB_deltaPower_stim	BL_mean_Alc5	-0.399711	0.286487	-1.15371
dB_deltaPower_stim	BL_mean_Alc10	0.0385758	0.921511	0.102138
dB_deltaPower_stim	BL_mean_Alc20	0.308832	0.418737	0.859087
dB_deltaPower_stim	BL_mean_TotalAlc	-0.332073	0.382628	-0.931437
dB_deltaPower_stim	ADE_mean_Alc5	-0.116155	0.766015	-0.309413
dB_deltaPower_stim	ADE_mean_Alc10	-0.528014	0.143967	-1.645
dB_deltaPower_stim	ADE_mean_Alc20	-0.110022	0.778114	-0.292869
dB_deltaPower_stim	ADE_mean_TotalAlc	-0.575745	0.104742	-1.86304
dB_deltaPower_stim	Relapse_mean_Alc5	0.17565	0.651242	0.472065
dB_deltaPower_stim	Relapse_mean_Alc10	-0.494085	0.176398	-1.50357
dB_deltaPower_stim	Relapse_mean_Alc20	-0.355484	0.347806	-1.00625
dB_deltaPower_stim	Relapse_mean_TotalAlc	-0.503382	0.167133	-1.54135
dB_thetaPower_stim	BL_mean_Alc5	-0.43747	0.23897	-1.28714
dB_thetaPower_stim	BL_mean_Alc10	0.0243975	0.950322	0.0645689
dB_thetaPower_stim	BL_mean_Alc20	0.262033	0.495798	0.718375
dB_thetaPower_stim	BL_mean_TotalAlc	-0.387298	0.303091	-1.11144
dB_thetaPower_stim	ADE_mean_Alc5	-0.0940966	0.809717	-0.250066
dB_thetaPower_stim	ADE_mean_Alc10	-0.548321	0.126372	-1.73475
dB_thetaPower_stim	ADE_mean_Alc20	-0.103749	0.790531	-0.275984
dB_thetaPower_stim	ADE_mean_TotalAlc	-0.578464	0.102731	-1.87625
dB_thetaPower_stim	Relapse_mean_Alc5	0.260339	0.49869	0.713392
dB_thetaPower_stim	Relapse_mean_Alc10	-0.592511	0.0927103	-1.94601
dB_thetaPower_stim	Relapse_mean_Alc20	-0.337419	0.374537	-0.948341
dB_thetaPower_stim	Relapse_mean_TotalAlc	-0.440386	0.235491	-1.29777
dB_alphaPower_stim	BL_mean_Alc5	-0.434178	0.24293	-1.27519
dB_alphaPower_stim	BL_mean_Alc10	0.0438496	0.910813	0.116127
dB_alphaPower_stim	BL_mean_Alc20	0.288483	0.451554	0.797145
dB_alphaPower_stim	BL_mean_TotalAlc	-0.411332	0.271378	-1.19397
dB_alphaPower_stim	ADE_mean_Alc5	-0.154217	0.691992	-0.412959
dB_alphaPower_stim	ADE_mean_Alc10	-0.551869	0.123435	-1.75088
dB_alphaPower_stim	ADE_mean_Alc20	-0.141353	0.716789	-0.377779
dB_alphaPower_stim	ADE_mean_TotalAlc	-0.64669	0.0597979	-2.24317
dB_alphaPower_stim	Relapse_mean_Alc5	0.195402	0.61438	0.527145
dB_alphaPower_stim	Relapse_mean_Alc10	-0.521841	0.149584	-1.61852
dB_alphaPower_stim	Relapse_mean_Alc20	-0.38122	0.311395	-1.091
dB_alphaPower_stim	Relapse_mean_TotalAlc	-0.503767	0.166756	-1.54293
dB_betaPower_stim	BL_mean_Alc5	-0.0634584	0.871157	-0.168234
dB_betaPower_stim	BL_mean_Alc10	-0.414402	0.267459	-1.20471
dB_betaPower_stim	BL_mean_Alc20	0.0206068	0.958035	0.054532
dB_betaPower_stim	BL_mean_TotalAlc	-0.670032	0.0483061	-2.38806
dB_betaPower_stim	ADE_mean_Alc5	0.118276	0.761841	0.315141
dB_betaPower_stim	ADE_mean_Alc10	-0.819777	0.00682681	-3.78731
dB_betaPower_stim	ADE_mean_Alc20	-0.292943	0.444268	-0.810616
dB_betaPower_stim	ADE_mean_TotalAlc	-0.834559	0.00513792	-4.00791
dB_betaPower_stim	Relapse_mean_Alc5	0.293907	0.4427	0.813534
dB_betaPower_stim	Relapse_mean_Alc10	-0.328477	0.388116	-0.920125
dB_betaPower_stim	Relapse_mean_Alc20	-0.39506	0.292651	-1.13778
dB_betaPower_stim	Relapse_mean_TotalAlc	-0.438456	0.23779	-1.29073
dB_gammaPower_stim	BL_mean_Alc5	-0.230012	0.551594	-0.62532
dB_gammaPower_stim	BL_mean_Alc10	-0.40936	0.273912	-1.18709
dB_gammaPower_stim	BL_mean_Alc20	0.0312104	0.93647	0.0826152
dB_gammaPower_stim	BL_mean_TotalAlc	-0.716457	0.0298884	-2.71715
dB_gammaPower_stim	ADE_mean_Alc5	0.00998721	0.979656	0.026425
dB_gammaPower_stim	ADE_mean_Alc10	-0.78426	0.0123456	-3.34437
dB_gammaPower_stim	ADE_mean_Alc20	-0.161356	0.678337	-0.432576
dB_gammaPower_stim	ADE_mean_TotalAlc	-0.78426	0.0123456	-3.34437
dB_gammaPower_stim	Relapse_mean_Alc5	0.251343	0.514164	0.687046
dB_gammaPower_stim	Relapse_mean_Alc10	-0.457508	0.215621	-1.36127
dB_gammaPower_stim	Relapse_mean_Alc20	-0.246765	0.52211	-0.673713
dB_gammaPower_stim	Relapse_mean_TotalAlc	-0.24599	0.52346	-0.67146
dB_TotalPower_stim	BL_mean_Alc5	-0.25508	0.507713	-0.697967
dB_TotalPower_stim	BL_mean_Alc10	-0.127833	0.743102	-0.341011
dB_TotalPower_stim	BL_mean_Alc20	0.196566	0.612229	0.530414
dB_TotalPower_stim	BL_mean_TotalAlc	-0.452928	0.220843	-1.34411
dB_TotalPower_stim	ADE_mean_Alc5	0.127833	0.743102	0.341011
dB_TotalPower_stim	ADE_mean_Alc10	-0.651523	0.0572902	-2.27221
dB_TotalPower_stim	ADE_mean_Alc20	-0.240602	0.532884	-0.655838
dB_TotalPower_stim	ADE_mean_TotalAlc	-0.597631	0.0892131	-1.97211
dB_TotalPower_stim	Relapse_mean_Alc5	0.420958	0.259189	1.22784
dB_TotalPower_stim	Relapse_mean_Alc10	-0.570169	0.108943	-1.83624
dB_TotalPower_stim	Relapse_mean_Alc20	-0.393966	0.294111	-1.13405
dB_TotalPower_stim	Relapse_mean_TotalAlc	-0.448306	0.226181	-1.32692

## Sheet: FC channel
Parameter1	Parameter2	estimate	p.value	statistic
AmplP1N1_stim	BL_mean_Alc5	-0.0699258	0.858127	-0.18546
AmplP1N1_stim	BL_mean_Alc10	-0.154348	0.69174	-0.41332
AmplP1N1_stim	BL_mean_Alc20	-0.0274171	0.944181	-0.0725662
AmplP1N1_stim	BL_mean_TotalAlc	-0.426631	0.252143	-1.24804
AmplP1N1_stim	ADE_mean_Alc5	0.0280682	0.942858	0.0742907
AmplP1N1_stim	ADE_mean_Alc10	-0.573684	0.106284	-1.85309
AmplP1N1_stim	ADE_mean_Alc20	-0.384253	0.307238	-1.10118
AmplP1N1_stim	ADE_mean_TotalAlc	-0.72825	0.0260888	-2.81152
AmplP1N1_stim	Relapse_mean_Alc5	0.27377	0.47595	0.753099
AmplP1N1_stim	Relapse_mean_Alc10	-0.350441	0.355171	-0.989959
AmplP1N1_stim	Relapse_mean_Alc20	-0.385353	0.305736	-1.10488
AmplP1N1_stim	Relapse_mean_TotalAlc	-0.498452	0.172011	-1.52123
AmplN1P2_stim	BL_mean_Alc5	-0.267886	0.485858	-0.735648
AmplN1P2_stim	BL_mean_Alc10	-0.0624199	0.873251	-0.16547
AmplN1P2_stim	BL_mean_Alc20	0.104892	0.788266	0.279056
AmplN1P2_stim	BL_mean_TotalAlc	-0.485913	0.184779	-1.47093
AmplN1P2_stim	ADE_mean_Alc5	-0.259282	0.500498	-0.710287
AmplN1P2_stim	ADE_mean_Alc10	-0.111156	0.775873	-0.295925
AmplN1P2_stim	ADE_mean_Alc20	0.0979463	0.802054	0.260394
AmplN1P2_stim	ADE_mean_TotalAlc	-0.207275	0.59257	-0.560572
AmplN1P2_stim	Relapse_mean_Alc5	0.0210979	0.957036	0.0558323
AmplN1P2_stim	Relapse_mean_Alc10	-0.139145	0.721069	-0.37176
AmplN1P2_stim	Relapse_mean_Alc20	0.207064	0.592954	0.559977
AmplN1P2_stim	Relapse_mean_TotalAlc	0.162144	0.676834	0.434747
AmplP2N2_stim	BL_mean_Alc5	0.271444	0.479857	0.74619
AmplP2N2_stim	BL_mean_Alc10	-0.119514	0.759408	-0.318486
AmplP2N2_stim	BL_mean_Alc20	-0.223593	0.563053	-0.606937
AmplP2N2_stim	BL_mean_TotalAlc	0.225253	0.560081	0.611683
AmplP2N2_stim	ADE_mean_Alc5	0.364321	0.335079	1.03504
AmplP2N2_stim	ADE_mean_Alc10	0.551454	0.123777	1.74898
AmplP2N2_stim	ADE_mean_Alc20	-0.0879624	0.821956	-0.233632
AmplP2N2_stim	ADE_mean_TotalAlc	0.579449	0.102007	1.88106
AmplP2N2_stim	Relapse_mean_Alc5	0.241039	0.532117	0.657104
AmplP2N2_stim	Relapse_mean_Alc10	0.0446164	0.909259	0.118162
AmplP2N2_stim	Relapse_mean_Alc20	0.04868	0.901025	0.128948
AmplP2N2_stim	Relapse_mean_TotalAlc	0.486463	0.184207	1.47311
AmplN2P3_stim	BL_mean_Alc5	-0.0437359	0.911044	-0.115825
AmplN2P3_stim	BL_mean_Alc10	0.018657	0.962003	0.0493703
AmplN2P3_stim	BL_mean_Alc20	-0.102656	0.792699	-0.273044
AmplN2P3_stim	BL_mean_TotalAlc	-0.245443	0.524413	-0.669873
AmplN2P3_stim	ADE_mean_Alc5	-0.0262852	0.946483	-0.0695682
AmplN2P3_stim	ADE_mean_Alc10	-0.534084	0.138566	-1.6714
AmplN2P3_stim	ADE_mean_Alc20	-0.326133	0.391714	-0.912772
AmplN2P3_stim	ADE_mean_TotalAlc	-0.659334	0.0533795	-2.32019
AmplN2P3_stim	Relapse_mean_Alc5	0.245546	0.524234	0.670171
AmplN2P3_stim	Relapse_mean_Alc10	-0.259394	0.500306	-0.710616
AmplN2P3_stim	Relapse_mean_Alc20	-0.283137	0.460355	-0.781072
AmplN2P3_stim	Relapse_mean_TotalAlc	-0.516671	0.154386	-1.5966
dB_deltaPower_stim	BL_mean_Alc5	-0.152552	0.695187	-0.408395
dB_deltaPower_stim	BL_mean_Alc10	-0.0395695	0.919495	-0.104773
dB_deltaPower_stim	BL_mean_Alc20	0.0737934	0.85035	0.195773
dB_deltaPower_stim	BL_mean_TotalAlc	-0.275527	0.473008	-0.758329
dB_deltaPower_stim	ADE_mean_Alc5	-0.223675	0.562905	-0.607172
dB_deltaPower_stim	ADE_mean_Alc10	-0.476631	0.194565	-1.43447
dB_deltaPower_stim	ADE_mean_Alc20	-0.267401	0.486679	-0.734212
dB_deltaPower_stim	ADE_mean_TotalAlc	-0.701812	0.0350883	-2.60657
dB_deltaPower_stim	Relapse_mean_Alc5	0.138026	0.723242	0.368711
dB_deltaPower_stim	Relapse_mean_Alc10	-0.147278	0.705338	-0.393957
dB_deltaPower_stim	Relapse_mean_Alc20	-0.328926	0.387429	-0.921535
dB_deltaPower_stim	Relapse_mean_TotalAlc	-0.481057	0.189863	-1.45178
dB_thetaPower_stim	BL_mean_Alc5	-0.0804268	0.837037	-0.213481
dB_thetaPower_stim	BL_mean_Alc10	-0.123039	0.752487	-0.328024
dB_thetaPower_stim	BL_mean_Alc20	-0.04076	0.917079	-0.10793
dB_thetaPower_stim	BL_mean_TotalAlc	-0.403499	0.281514	-1.16676
dB_thetaPower_stim	ADE_mean_Alc5	0.0173143	0.964737	0.0458161
dB_thetaPower_stim	ADE_mean_Alc10	-0.498941	0.171523	-1.52322
dB_thetaPower_stim	ADE_mean_Alc20	-0.346171	0.361468	-0.976241
dB_thetaPower_stim	ADE_mean_TotalAlc	-0.610629	0.0807036	-2.04008
dB_thetaPower_stim	Relapse_mean_Alc5	0.373032	0.322762	1.06373
dB_thetaPower_stim	Relapse_mean_Alc10	-0.293422	0.443489	-0.812065
dB_thetaPower_stim	Relapse_mean_Alc20	-0.28632	0.455106	-0.790633
dB_thetaPower_stim	Relapse_mean_TotalAlc	-0.361537	0.339063	-1.02593
dB_alphaPower_stim	BL_mean_Alc5	-0.0941492	0.809612	-0.250207
dB_alphaPower_stim	BL_mean_Alc10	-0.156385	0.687837	-0.418909
dB_alphaPower_stim	BL_mean_Alc20	-0.0701345	0.857708	-0.186016
dB_alphaPower_stim	BL_mean_TotalAlc	-0.506036	0.164541	-1.55226
dB_alphaPower_stim	ADE_mean_Alc5	-0.0198641	0.959547	-0.0525658
dB_alphaPower_stim	ADE_mean_Alc10	-0.467026	0.204991	-1.39739
dB_alphaPower_stim	ADE_mean_Alc20	-0.33204	0.382678	-0.931334
dB_alphaPower_stim	ADE_mean_TotalAlc	-0.638461	0.0642256	-2.19476
dB_alphaPower_stim	Relapse_mean_Alc5	0.350672	0.354832	0.990703
dB_alphaPower_stim	Relapse_mean_Alc10	-0.300458	0.432108	-0.833447
dB_alphaPower_stim	Relapse_mean_Alc20	-0.264787	0.491111	-0.726491
dB_alphaPower_stim	Relapse_mean_TotalAlc	-0.324537	0.394171	-0.907781
dB_betaPower_stim	BL_mean_Alc5	-0.104756	0.788535	-0.278692
dB_betaPower_stim	BL_mean_Alc10	0.0279396	0.943119	0.0739502
dB_betaPower_stim	BL_mean_Alc20	-0.215618	0.57741	-0.584214
dB_betaPower_stim	BL_mean_TotalAlc	-0.43751	0.238922	-1.28728
dB_betaPower_stim	ADE_mean_Alc5	0.0243274	0.950465	0.0643833
dB_betaPower_stim	ADE_mean_Alc10	-0.602369	0.0860503	-1.9966
dB_betaPower_stim	ADE_mean_Alc20	-0.371649	0.324702	-1.05916
dB_betaPower_stim	ADE_mean_TotalAlc	-0.681869	0.0430639	-2.46633
dB_betaPower_stim	Relapse_mean_Alc5	0.300427	0.432159	0.833351
dB_betaPower_stim	Relapse_mean_Alc10	-0.448713	0.225707	-1.32843
dB_betaPower_stim	Relapse_mean_Alc20	-0.243279	0.528194	-0.663591
dB_betaPower_stim	Relapse_mean_TotalAlc	-0.471222	0.200399	-1.41351
dB_gammaPower_stim	BL_mean_Alc5	-0.204379	0.597864	-0.552397
dB_gammaPower_stim	BL_mean_Alc10	-0.274594	0.47457	-0.75555
dB_gammaPower_stim	BL_mean_Alc20	0.195479	0.614238	0.527362
dB_gammaPower_stim	BL_mean_TotalAlc	-0.529908	0.142268	-1.6532
dB_gammaPower_stim	ADE_mean_Alc5	-0.192826	0.619146	-0.519928
dB_gammaPower_stim	ADE_mean_Alc10	-0.416671	0.264581	-1.21269
dB_gammaPower_stim	ADE_mean_Alc20	-0.0699046	0.85817	-0.185404
dB_gammaPower_stim	ADE_mean_TotalAlc	-0.564149	0.113591	-1.80774
dB_gammaPower_stim	Relapse_mean_Alc5	-0.0398847	0.918855	-0.105609
dB_gammaPower_stim	Relapse_mean_Alc10	-0.112497	0.773226	-0.29954
dB_gammaPower_stim	Relapse_mean_Alc20	-0.0992795	0.799403	-0.263973
dB_gammaPower_stim	Relapse_mean_TotalAlc	-0.224741	0.560997	-0.610219
dB_TotalPower_stim	BL_mean_Alc5	-0.100018	0.797936	-0.265957
dB_TotalPower_stim	BL_mean_Alc10	-0.124886	0.748868	-0.333025
dB_TotalPower_stim	BL_mean_Alc20	-0.119422	0.759587	-0.31824
dB_TotalPower_stim	BL_mean_TotalAlc	-0.511447	0.159327	-1.5747
dB_TotalPower_stim	ADE_mean_Alc5	-0.0220501	0.955098	-0.0583534
dB_TotalPower_stim	ADE_mean_Alc10	-0.481913	0.188961	-1.45514
dB_TotalPower_stim	ADE_mean_Alc20	-0.340809	0.369448	-0.959116
dB_TotalPower_stim	ADE_mean_TotalAlc	-0.653927	0.0560678	-2.28684
dB_TotalPower_stim	Relapse_mean_Alc5	0.340578	0.369794	0.95838
dB_TotalPower_stim	Relapse_mean_Alc10	-0.34832	0.358292	-0.983136
dB_TotalPower_stim	Relapse_mean_Alc20	-0.255503	0.506985	-0.699204
dB_TotalPower_stim	Relapse_mean_TotalAlc	-0.324346	0.394466	-0.907183
