# Supplementary material for: Chronic alcohol-induced brain states limit propagation of direct cortical stimulation
Source: Sci Rep. 2025 Oct 10;15:35407. doi: 10.1038/s41598-025-21802-z (PMC12514308; doi:10.1038/s41598-025-21802-z)
Supplement: Supplementary file 16 — Supplementary Material 16 [file 41598_2025_21802_MOESM16_ESM.xlsx]

## Sheet: LatP1
Channel	Variable	Mean_AlcStim	Mean_ControlSham	SD_AlcStim	SD_ControlSham	t_value	df	p_value	sig	conf_interval_low	conf_interval_high
PR	LatP1	56.0373	57.1217	8.13805	5.47519	-0.349593	15.7621	0.731271		-7.66772	5.49905
MR	LatP1	56.7607	56.7667	7.74248	6.67046	-0.00185659	17.6145	0.99854		-6.80629	6.79429
FR	LatP1	54.552	58.4497	1.14881	5.52329	-2.18479	9.77726	0.054405		-7.88497	0.0896364
FC	LatP1	53.4513	59.2667	1.17885	6.80559	-2.6625	9.5396	0.0247206	*	-10.714	-0.916686
PC	LatP1	56.567	57.6647	7.3735	6.7051	-0.348287	17.8399	0.731701		-7.72323	5.5279
MC	LatP1	57.1443	56.5983	8.11263	6.27584	0.168338	16.9314	0.868312		-6.29923	7.39123
FL	LatP1	57.1757	58.4667	7.47276	6.27989	-0.418242	17.4817	0.680863		-7.78979	5.20779
ML	LatP1	57.1273	57.5987	8.07291	4.63703	-0.160097	14.3557	0.875035		-6.77103	5.82836
PL	LatP1	56.7043	55.3677	7.94483	7.46378	0.38776	17.9302	0.702759		-5.90755	8.58088

## Sheet: LatN1
Channel	Variable	Mean_AlcStim	Mean_ControlSham	SD_AlcStim	SD_ControlSham	t_value	df	p_value	sig	conf_interval_low	conf_interval_high
PR	LatN1	79.059	96.3327	9.9901	11.5068	-3.58465	17.652	0.00217297	*	-27.4119	-7.13544
MR	LatN1	79.9863	96.7	9.46416	13.5241	-3.20193	16.1099	0.00551641	*	-27.7732	-5.65417
FR	LatN1	78.5403	92.3123	6.37238	10.7049	-3.49582	14.6668	0.00334928	*	-22.1856	-5.35838
FC	LatN1	76.988	96.6	6.73137	11.4696	-4.66342	14.5424	0.000331424	*	-28.6004	-10.6236
PC	LatN1	77.6567	95.7683	8.36617	9.92876	-4.41128	17.4968	0.000358427	*	-26.7554	-9.46796
MC	LatN1	79.3677	90.2827	9.258	10.6935	-2.44029	17.6385	0.025479	*	-20.3259	-1.50413
FL	LatN1	80.437	97.5333	9.74437	11.3825	-3.60813	17.5822	0.0020742	*	-27.0681	-7.12459
ML	LatN1	80.704	97.6733	10.6253	10.9041	-3.52462	17.9879	0.00242272	*	-27.0848	-6.85392
PL	LatN1	82.4047	95.8033	9.81809	9.33011	-3.12829	17.9534	0.00582185	*	-22.3987	-4.39862

## Sheet: LatP2
Channel	Variable	Mean_AlcStim	Mean_ControlSham	SD_AlcStim	SD_ControlSham	t_value	df	p_value	sig	conf_interval_low	conf_interval_high
PR	LatP2	103.818	144.876	6.95692	30.6414	-4.13216	9.92541	0.00206981	*	-63.2203	-18.8963
MR	LatP2	105.309	150.133	6.26788	34.1135	-4.08674	9.60697	0.00238137	*	-69.3993	-20.2494
FR	LatP2	107.823	142.194	7.77463	25.4666	-4.08206	10.6632	0.00193319	*	-52.976	-15.7673
FC	LatP2	103.878	147.367	5.5486	31.9249	-4.24409	9.54323	0.00189389	*	-66.4691	-20.5082
PC	LatP2	103.191	134.244	6.74665	21.9209	-4.28151	10.6899	0.00138179	*	-47.0735	-15.0331
MC	LatP2	104.732	136.171	5.66898	33.6392	-2.91441	9.51079	0.0162443	*	-55.6447	-7.23462
FL	LatP2	106.089	147.167	6.70292	34.0251	-3.74571	9.69751	0.00402026	*	-65.6159	-16.5388
ML	LatP2	106.904	139.726	7.06887	32.8766	-3.08645	9.83037	0.0117398	*	-56.5715	-9.07188
PL	LatP2	112.299	137.458	11.7041	33.6577	-2.2326	11.1452	0.0470108	*	-49.9211	-0.395588

## Sheet: LatN2
Channel	Variable	Mean_AlcStim	Mean_ControlSham	SD_AlcStim	SD_ControlSham	t_value	df	p_value	sig	conf_interval_low	conf_interval_high
PR	LatN2	121.675	166.918	20.6791	39.5828	-3.20363	13.5722	0.00659502	*	-75.6224	-14.8636
MR	LatN2	119.852	168.867	17.1382	41.7187	-3.43663	11.9535	0.00495125	*	-80.1032	-17.9261
FR	LatN2	122.111	158.573	15.6071	32.0801	-3.23209	13.0343	0.00653045	*	-60.8283	-12.0971
FC	LatN2	117.123	166.267	17.7286	41.0525	-3.47532	12.2441	0.00445814	*	-79.8857	-18.4016
PC	LatN2	128.563	156.736	18.6781	28.6946	-2.60212	15.4659	0.0196484	*	-51.1903	-5.15638
MC	LatN2	130.886	166.525	25.894	41.2067	-2.31572	15.149	0.0349869	*	-68.4134	-2.86392
FL	LatN2	128.264	167	25.0301	40.4969	-2.57298	15.0006	0.0212079	*	-70.8247	-6.64732
ML	LatN2	132.191	169.171	22.7528	39.6133	-2.55986	14.3554	0.0223398	*	-67.892	-6.06795
PL	LatN2	129.422	162.939	17.9819	38.4837	-2.49522	12.7512	0.0271395	*	-62.5944	-4.44029

## Sheet: LatP3
Channel	Variable	Mean_AlcStim	Mean_ControlSham	SD_AlcStim	SD_ControlSham	t_value	df	p_value	sig	conf_interval_low	conf_interval_high
PR	LatP3	266.821	282.951	91.9594	74.1006	-0.431904	17.2214	0.67117		-94.8466	62.5866
MR	LatP3	244.55	307.9	83.163	70.66	-1.83573	17.5425	0.0834087		-135.987	9.2875
FR	LatP3	342.494	312.428	72.2316	60.8816	1.00648	17.4985	0.3279		-32.8234	92.9567
FC	LatP3	266.278	307.267	82.0687	84.2369	-1.10214	17.9878	0.284928		-119.127	37.1486
PC	LatP3	301.554	259.189	71.7037	56.5929	1.46661	17.0781	0.160654		-18.5585	103.289
MC	LatP3	280.575	316.568	87.5129	68.2292	-1.0257	16.9894	0.319418		-110.032	38.0462
FL	LatP3	267.927	305.433	93.7326	79.8149	-0.963414	17.5542	0.348425		-119.447	44.4335
ML	LatP3	279.962	301.679	94.4074	75.996	-0.566652	17.2146	0.578265		-102.499	59.0652
PL	LatP3	313.182	319.425	96.2263	82.9076	-0.15543	17.6148	0.87825		-90.7613	78.2753

## Sheet: AmplP1N1
Channel	Variable	Mean_AlcStim	Mean_ControlSham	SD_AlcStim	SD_ControlSham	t_value	df	p_value	sig	conf_interval_low	conf_interval_high
PR	AmplP1N1	44.7232	28.8419	41.243	18.6325	1.10969	12.5269	0.28798		-15.1558	46.9182
MR	AmplP1N1	34.5388	34.3061	24.8981	24.8787	0.0209099	18	0.983548		-23.1514	23.6169
FR	AmplP1N1	30.0491	34.1691	14.9982	24.3249	-0.455914	14.9789	0.654992		-23.384	15.1439
FC	AmplP1N1	50.2648	34.1466	20.3875	23.6615	1.63193	17.615	0.120443		-4.66476	36.9013
PC	AmplP1N1	30.7142	32.9831	20.7602	18.5611	-0.257652	17.779	0.799634		-20.7867	16.2488
MC	AmplP1N1	24.7874	28.3866	22.5876	21.3903	-0.365868	17.9469	0.718741		-24.2712	17.0728
FL	AmplP1N1	29.676	32.8955	23.073	19.9077	-0.334086	17.6218	0.742257		-23.4969	17.0578
ML	AmplP1N1	26.5353	30.2987	21.0699	24.9932	-0.36406	17.4995	0.720175		-25.5259	17.9991
PL	AmplP1N1	25.3237	24.9928	28.5627	17.7873	0.0310913	15.068	0.975605		-22.3401	23.0018

## Sheet: AmplN1P2
Channel	Variable	Mean_AlcStim	Mean_ControlSham	SD_AlcStim	SD_ControlSham	t_value	df	p_value	sig	conf_interval_low	conf_interval_high
PR	AmplN1P2	19.7538	18.5487	21.6781	18.977	0.132276	17.6904	0.896259		-17.96	20.3703
MR	AmplN1P2	15.4534	19.7589	14.3032	23.0165	-0.50243	15.0491	0.622637		-22.5655	13.9545
FR	AmplN1P2	13.2541	18.3021	4.09489	23.8147	-0.660615	9.53173	0.524502		-22.1881	12.0921
FC	AmplN1P2	22.767	20.1631	10.2416	23.6386	0.319639	12.2638	0.754622		-15.1037	20.3117
PC	AmplN1P2	16.5945	18.6146	14.6231	14.3976	-0.311301	17.9957	0.759149		-15.6542	11.6139
MC	AmplN1P2	10.783	17.9875	8.94852	21.5446	-0.976575	12.0155	0.348032		-23.2759	8.86695
FL	AmplN1P2	12.3705	19.7133	8.46496	21.4858	-1.00549	11.7282	0.334954		-23.295	8.60938
ML	AmplN1P2	11.726	16.496	6.6001	21.3298	-0.675585	10.7078	0.51363		-20.3622	10.8221
PL	AmplN1P2	11.3809	14.072	9.86379	12.3773	-0.537691	17.146	0.597701		-13.2437	7.86152

## Sheet: AmplP2N2
Channel	Variable	Mean_AlcStim	Mean_ControlSham	SD_AlcStim	SD_ControlSham	t_value	df	p_value	sig	conf_interval_low	conf_interval_high
PR	AmplP2N2	5.36184	4.78991	4.84395	4.17474	0.282828	17.6163	0.780605		-3.68316	4.82702
MR	AmplP2N2	3.65997	5.923	4.39352	4.63857	-1.1201	17.9472	0.277437		-6.50859	1.98253
FR	AmplP2N2	6.15672	3.13272	3.86302	4.06336	1.70562	17.9542	0.105318		-0.701529	6.74953
FC	AmplP2N2	3.97572	3.238	5.05654	4.39788	0.348113	17.6605	0.73187		-3.72069	5.19613
PC	AmplP2N2	7.93814	4.29996	4.92776	4.91	1.65387	17.9998	0.115487		-0.983421	8.25978
MC	AmplP2N2	6.96152	5.07883	6.23873	5.77473	0.700329	17.8935	0.492728		-3.76762	7.533
FL	AmplP2N2	6.05621	3.901	6.66126	3.5113	0.90509	13.643	0.381123		-2.96454	7.27496
ML	AmplP2N2	6.47864	3.99027	4.18655	2.94418	1.53745	16.1526	0.143539		-0.940064	5.9168
PL	AmplP2N2	4.74866	4.321	3.4269	4.20933	0.249153	17.289	0.806178		-3.18913	4.04445

## Sheet: AmplN2P3
Channel	Variable	Mean_AlcStim	Mean_ControlSham	SD_AlcStim	SD_ControlSham	t_value	df	p_value	sig	conf_interval_low	conf_interval_high
PR	AmplN2P3	30.2145	17.3023	22.5988	3.80155	1.78178	9.50895	0.10668		-3.34843	29.1728
MR	AmplN2P3	25.3898	21.6285	13.7017	11.0117	0.676647	17.2036	0.507626		-7.95603	15.4786
FR	AmplN2P3	28.9818	19.8034	9.28999	10.884	2.02834	17.5668	0.0579665		-0.345286	18.7021
FC	AmplN2P3	33.7919	22.1419	11.1702	11.3179	2.31674	17.9969	0.0325087	*	1.08514	22.2148
PC	AmplN2P3	27.9258	21.5289	7.02987	8.03974	1.89414	17.6851	0.0746806		-0.707408	13.5013
MC	AmplN2P3	25.3334	21.5336	15.8679	10.9935	0.622457	16.022	0.5424		-9.13972	16.7393
FL	AmplN2P3	25.1292	21.9696	15.202	9.82395	0.552023	15.4007	0.588855		-9.01262	15.3319
ML	AmplN2P3	25.853	21.2894	19.0392	14.5683	0.601966	16.8484	0.555211		-11.4421	20.5692
PL	AmplN2P3	21.6269	19.8086	18.0718	10.3154	0.276334	14.3018	0.786245		-12.267	15.9037

## Sheet: dB_deltaPower
Channel	Variable	Mean_AlcStim	Mean_ControlSham	SD_AlcStim	SD_ControlSham	t_value	df	p_value	sig	conf_interval_low	conf_interval_high
PR	dB_deltaPower	22.7187	21.7462	6.10728	3.6444	0.432406	14.6883	0.671728		-3.83004	5.77501
MR	dB_deltaPower	21.8716	23.0813	5.77188	4.67355	-0.515085	17.2535	0.61303		-6.15916	3.73976
FR	dB_deltaPower	22.4205	22.452	2.76024	5.81803	-0.0154452	12.8561	0.987914		-4.43579	4.37288
FC	dB_deltaPower	26.5905	23.938	3.34206	4.97754	1.39905	15.7441	0.181191		-1.37201	6.67698
PC	dB_deltaPower	22.6874	23.3777	3.84253	4.19677	-0.383636	17.8618	0.705777		-4.47278	3.09216
MC	dB_deltaPower	20.6609	22.1993	5.21385	4.62098	-0.698254	17.7439	0.494069		-6.17173	3.09505
FL	dB_deltaPower	21.8957	23.4371	5.69543	4.15528	-0.691369	16.4659	0.498966		-6.25674	3.174
ML	dB_deltaPower	21.5272	22.3761	4.85218	5.75377	-0.356666	17.5013	0.725605		-5.85958	4.16176
PL	dB_deltaPower	19.6212	21.1535	5.0602	4.5551	-0.711697	17.8046	0.485874		-6.05916	2.99458

[truncated: 16 more sheets: dB_thetaPower, dB_alphaPower, dB_betaPower, dB_gammaPower, Time_deltaPower, Freq_deltaPower, Time_thetaPower, Freq_thetaPower, Time_alphaPower, Freq_alphaPower, Time_betaPower, Freq_betaPower, Time_gammaPower, Freq_gammaPower, Time_Totalpower, Freq_Totalpower]
