# Supplementary material for: Chronic alcohol-induced brain states limit propagation of direct cortical stimulation
Source: Sci Rep. 2025 Oct 10;15:35407. doi: 10.1038/s41598-025-21802-z (PMC12514308; doi:10.1038/s41598-025-21802-z)
Supplement: Supplementary file 17 — Supplementary Material 17 [file 41598_2025_21802_MOESM17_ESM.xlsx]

## Sheet: LatP1_rmANOVA
ANOVA.Effect	ANOVA.DFn	ANOVA.DFd	ANOVA.SSn	ANOVA.SSd	ANOVA.F	ANOVA.p	ANOVA.p..05	ANOVA.ges	Mauchly_Test.Effect	Mauchly_Test.W	Mauchly_Test.p	Mauchly_Test.p..05	Sphericity_Corrections.Effect	Sphericity_Corrections.GGe	Sphericity_Corrections.p.GG.	Sphericity_Corrections.p.GG...05	Sphericity_Corrections.HFe	Sphericity_Corrections.p.HF.	Sphericity_Corrections.p.HF...05
(Intercept)	1	18	581201	5190.11	2015.68	6.20745e-20	*	0.987983	Channel	9.89566e-05	6.36973e-14	*	Channel	0.33938	0.695728		0.405511	0.729263
Group	1	18	77.1023	5190.11	0.267401	0.611376		0.0107888	Group:Channel	9.89566e-05	6.36973e-14	*	Group:Channel	0.33938	0.144996		0.405511	0.133009
Channel	8	144	47.5458	1879.28	0.4554	0.885418		0.00668066	Channel	9.89566e-05	6.36973e-14	*	Channel	0.33938	0.695728		0.405511	0.729263
Group:Channel	8	144	199.719	1879.28	1.91293	0.0622839		0.027475	Group:Channel	9.89566e-05	6.36973e-14	*	Group:Channel	0.33938	0.144996		0.405511	0.133009

## Sheet: LatN1_rmANOVA
ANOVA.Effect	ANOVA.DFn	ANOVA.DFd	ANOVA.SSn	ANOVA.SSd	ANOVA.F	ANOVA.p	ANOVA.p..05	ANOVA.ges	Mauchly_Test.Effect	Mauchly_Test.W	Mauchly_Test.p	Mauchly_Test.p..05	Sphericity_Corrections.Effect	Sphericity_Corrections.GGe	Sphericity_Corrections.p.GG.	Sphericity_Corrections.p.GG...05	Sphericity_Corrections.HFe	Sphericity_Corrections.p.HF.	Sphericity_Corrections.p.HF...05
(Intercept)	1	18	1.37664e+06	11722.1	2113.92	4.05933e-20	*	0.988081	Channel	0.0110156	0.000938176	*	Channel	0.538365	0.19444		0.728758	0.173302
Group	1	18	11498	11722.1	17.6559	0.000535961	*	0.40912	Group:Channel	0.0110156	0.000938176	*	Group:Channel	0.538365	0.367384		0.728758	0.370591
Channel	8	144	418.655	4884.1	1.54292	0.14739		0.0245908	Channel	0.0110156	0.000938176	*	Channel	0.538365	0.19444		0.728758	0.173302
Group:Channel	8	144	296.824	4884.1	1.09392	0.370815		0.0175604	Group:Channel	0.0110156	0.000938176	*	Group:Channel	0.538365	0.367384		0.728758	0.370591

## Sheet: LatP2_rmANOVA
ANOVA.Effect	ANOVA.DFn	ANOVA.DFd	ANOVA.SSn	ANOVA.SSd	ANOVA.F	ANOVA.p	ANOVA.p..05	ANOVA.ges	Mauchly_Test.Effect	Mauchly_Test.W	Mauchly_Test.p	Mauchly_Test.p..05	Sphericity_Corrections.Effect	Sphericity_Corrections.GGe	Sphericity_Corrections.p.GG.	Sphericity_Corrections.p.GG...05	Sphericity_Corrections.HFe	Sphericity_Corrections.p.HF.	Sphericity_Corrections.p.HF...05
(Intercept)	1	18	2.7711e+06	62279.2	800.907	2.24366e-16	*	0.970857	Channel	0.00136606	7.84863e-08	*	Channel	0.469056	0.344035		0.607969	0.345067
Group	1	18	58786.5	62279.2	16.9906	0.000640172	*	0.414083	Group:Channel	0.00136606	7.84863e-08	*	Group:Channel	0.469056	0.199911		0.607969	0.183463
Channel	8	144	1324.2	20902.2	1.14033	0.339969		0.0156699	Channel	0.00136606	7.84863e-08	*	Channel	0.469056	0.344035		0.607969	0.345067
Group:Channel	8	144	1803.45	20902.2	1.55305	0.1441		0.0212209	Group:Channel	0.00136606	7.84863e-08	*	Group:Channel	0.469056	0.199911		0.607969	0.183463

## Sheet: LatN2_rmANOVA
ANOVA.Effect	ANOVA.DFn	ANOVA.DFd	ANOVA.SSn	ANOVA.SSd	ANOVA.F	ANOVA.p	ANOVA.p..05	ANOVA.ges	Mauchly_Test.Effect	Mauchly_Test.W	Mauchly_Test.p	Mauchly_Test.p..05	Sphericity_Corrections.Effect	Sphericity_Corrections.GGe	Sphericity_Corrections.p.GG.	Sphericity_Corrections.p.GG...05	Sphericity_Corrections.HFe	Sphericity_Corrections.p.HF.	Sphericity_Corrections.p.HF...05
(Intercept)	1	18	3.79345e+06	127624	535.023	7.71785e-15	*	0.961232	Channel	0.000132014	3.22169e-13	*	Channel	0.408772	0.275404		0.510302	0.269654
Group	1	18	69191.7	127624	9.75871	0.00586446	*	0.311413	Group:Channel	0.000132014	3.22169e-13	*	Group:Channel	0.408772	0.233118		0.510302	0.223019
Channel	8	144	1862.31	25370.4	1.32129	0.237394		0.012026	Channel	0.000132014	3.22169e-13	*	Channel	0.408772	0.275404		0.510302	0.269654
Group:Channel	8	144	2054.6	25370.4	1.45772	0.17777		0.0132513	Group:Channel	0.000132014	3.22169e-13	*	Group:Channel	0.408772	0.233118		0.510302	0.223019

## Sheet: LatP3_rmANOVA
ANOVA.Effect	ANOVA.DFn	ANOVA.DFd	ANOVA.SSn	ANOVA.SSd	ANOVA.F	ANOVA.p	ANOVA.p..05	ANOVA.ges	Mauchly_Test.Effect	Mauchly_Test.W	Mauchly_Test.p	Mauchly_Test.p..05	Sphericity_Corrections.Effect	Sphericity_Corrections.GGe	Sphericity_Corrections.p.GG.	Sphericity_Corrections.p.GG...05	Sphericity_Corrections.HFe	Sphericity_Corrections.p.HF.	Sphericity_Corrections.p.HF...05
(Intercept)	1	18	1.54656e+07	665489	418.311	6.54307e-14	*	0.937149	Channel	0.0274684	0.0241054	*	Channel	0.661109	0.0312083	*	0.968526	0.0142396	*
Group	1	18	12416.2	665489	0.335831	0.569428		0.011829	Group:Channel	0.0274684	0.0241054	*	Group:Channel	0.661109	0.050181		0.968526	0.0272454	*
Channel	8	144	52279.7	371733	2.53148	0.0131586	*	0.047985	Channel	0.0274684	0.0241054	*	Channel	0.661109	0.0312083	*	0.968526	0.0142396	*
Group:Channel	8	144	46909.2	371733	2.27143	0.025624	*	0.0432689	Group:Channel	0.0274684	0.0241054	*	Group:Channel	0.661109	0.050181		0.968526	0.0272454	*

## Sheet: AmplP1N1_rmANOVA
ANOVA.Effect	ANOVA.DFn	ANOVA.DFd	ANOVA.SSn	ANOVA.SSd	ANOVA.F	ANOVA.p	ANOVA.p..05	ANOVA.ges	Mauchly_Test.Effect	Mauchly_Test.W	Mauchly_Test.p	Mauchly_Test.p..05	Sphericity_Corrections.Effect	Sphericity_Corrections.GGe	Sphericity_Corrections.p.GG.	Sphericity_Corrections.p.GG...05	Sphericity_Corrections.HFe	Sphericity_Corrections.p.HF.	Sphericity_Corrections.p.HF...05
(Intercept)	1	18	185366	57251.4	58.2797	4.74245e-07	*	0.674222	Channel	0.00271945	2.1844e-06	*	Channel	0.443445	0.0596632		0.56568	0.0437816	*
Group	1	18	135.061	57251.4	0.0424635	0.839052		0.00150565	Group:Channel	0.00271945	2.1844e-06	*	Group:Channel	0.443445	0.212714		0.56568	0.198864
Channel	8	144	4446.33	32316	2.4766	0.0151642	*	0.0472945	Channel	0.00271945	2.1844e-06	*	Channel	0.443445	0.0596632		0.56568	0.0437816	*
Group:Channel	8	144	2723.84	32316	1.51718	0.156055		0.0295136	Group:Channel	0.00271945	2.1844e-06	*	Group:Channel	0.443445	0.212714		0.56568	0.198864

## Sheet: AmplN1P2_rmANOVA
ANOVA.Effect	ANOVA.DFn	ANOVA.DFd	ANOVA.SSn	ANOVA.SSd	ANOVA.F	ANOVA.p	ANOVA.p..05	ANOVA.ges	Mauchly_Test.Effect	Mauchly_Test.W	Mauchly_Test.p	Mauchly_Test.p..05	Sphericity_Corrections.Effect	Sphericity_Corrections.GGe	Sphericity_Corrections.p.GG.	Sphericity_Corrections.p.GG...05	Sphericity_Corrections.HFe	Sphericity_Corrections.p.HF.	Sphericity_Corrections.p.HF...05
(Intercept)	1	18	49249.3	35654.5	24.8632	9.56351e-05	*	0.519583	Channel	0.00588169	7.07241e-05	*	Channel	0.476471	0.0859064		0.62044	0.0661673
Group	1	18	485.867	35654.5	0.245287	0.626405		0.0105571	Group:Channel	0.00588169	7.07241e-05	*	Group:Channel	0.476471	0.485217		0.62044	0.507326
Channel	8	144	1185.19	9882.46	2.15871	0.0340276	*	0.0253667	Channel	0.00588169	7.07241e-05	*	Channel	0.476471	0.0859064		0.62044	0.0661673
Group:Channel	8	144	474.885	9882.46	0.864961	0.547674		0.0103209	Group:Channel	0.00588169	7.07241e-05	*	Group:Channel	0.476471	0.485217		0.62044	0.507326

## Sheet: AmplP2N2_rmANOVA
ANOVA.Effect	ANOVA.DFn	ANOVA.DFd	ANOVA.SSn	ANOVA.SSd	ANOVA.F	ANOVA.p	ANOVA.p..05	ANOVA.ges	Mauchly_Test.Effect	Mauchly_Test.W	Mauchly_Test.p	Mauchly_Test.p..05	Sphericity_Corrections.Effect	Sphericity_Corrections.GGe	Sphericity_Corrections.p.GG.	Sphericity_Corrections.p.GG...05	Sphericity_Corrections.HFe	Sphericity_Corrections.p.HF.	Sphericity_Corrections.p.HF...05
(Intercept)	1	18	4501.21	2141.47	37.8347	8.28449e-06	*	0.561186	Channel	0.0292161	0.029204	*	Channel	0.532614	0.307931		0.718365	0.301527
Group	1	18	89.0804	2141.47	0.748761	0.398255		0.0246845	Group:Channel	0.0292161	0.029204	*	Group:Channel	0.532614	0.169098		0.718365	0.146431
Channel	8	144	93.6227	1378.21	1.22276	0.289773		0.0259106	Channel	0.0292161	0.029204	*	Channel	0.532614	0.307931		0.718365	0.301527
Group:Channel	8	144	125.609	1378.21	1.64051	0.118254		0.034458	Group:Channel	0.0292161	0.029204	*	Group:Channel	0.532614	0.169098		0.718365	0.146431

## Sheet: AmplN2P3_rmANOVA
ANOVA.Effect	ANOVA.DFn	ANOVA.DFd	ANOVA.SSn	ANOVA.SSd	ANOVA.F	ANOVA.p	ANOVA.p..05	ANOVA.ges	Mauchly_Test.Effect	Mauchly_Test.W	Mauchly_Test.p	Mauchly_Test.p..05	Sphericity_Corrections.Effect	Sphericity_Corrections.GGe	Sphericity_Corrections.p.GG.	Sphericity_Corrections.p.GG...05	Sphericity_Corrections.HFe	Sphericity_Corrections.p.HF.	Sphericity_Corrections.p.HF...05
(Intercept)	1	18	103321	15171.1	122.587	1.82319e-09	*	0.786636	Channel	0.00451462	2.2195e-05	*	Channel	0.50137	0.536147		0.663093	0.566507
Group	1	18	1820.24	15171.1	2.15965	0.15894		0.0609904	Group:Channel	0.00451462	2.2195e-05	*	Group:Channel	0.50137	0.478128		0.663093	0.499761
Channel	8	144	563.69	12853.3	0.789402	0.612748		0.0197176	Channel	0.00451462	2.2195e-05	*	Channel	0.50137	0.536147		0.663093	0.566507
Group:Channel	8	144	631.318	12853.3	0.884109	0.531558		0.0220311	Group:Channel	0.00451462	2.2195e-05	*	Group:Channel	0.50137	0.478128		0.663093	0.499761

## Sheet: dB_deltaPower_rmANOVA
ANOVA.Effect	ANOVA.DFn	ANOVA.DFd	ANOVA.SSn	ANOVA.SSd	ANOVA.F	ANOVA.p	ANOVA.p..05	ANOVA.ges	Mauchly_Test.Effect	Mauchly_Test.W	Mauchly_Test.p	Mauchly_Test.p..05	Sphericity_Corrections.Effect	Sphericity_Corrections.GGe	Sphericity_Corrections.p.GG.	Sphericity_Corrections.p.GG...05	Sphericity_Corrections.HFe	Sphericity_Corrections.p.HF.	Sphericity_Corrections.p.HF...05
(Intercept)	1	18	90565.7	2106.41	773.914	3.03468e-16	*	0.96023	Channel	0.0199443	0.00838843	*	Channel	0.525159	0.0203962	*	0.704994	0.0102863	*
Group	1	18	7.88518	2106.41	0.0673815	0.798134		0.00209776	Group:Channel	0.0199443	0.00838843	*	Group:Channel	0.525159	0.481705		0.704994	0.504448
Channel	8	144	277.883	1644.56	3.04148	0.00344024	*	0.0689731	Channel	0.0199443	0.00838843	*	Channel	0.525159	0.0203962	*	0.704994	0.0102863	*
Group:Channel	8	144	80.7806	1644.56	0.884157	0.531518		0.0210819	Group:Channel	0.0199443	0.00838843	*	Group:Channel	0.525159	0.481705		0.704994	0.504448

[truncated: 14 more sheets: dB_thetaPower_rmANOVA, dB_alphaPower_rmANOVA, dB_betaPower_rmANOVA, dB_gammaPower_rmANOVA, Time_deltaPower_rmANOVA, Freq_deltaPower_rmANOVA, Time_thetaPower_rmANOVA, Freq_thetaPower_rmANOVA, Time_alphaPower_rmANOVA, Freq_alphaPower_rmANOVA, Time_betaPower_rmANOVA, Freq_betaPower_rmANOVA, Time_gammaPower_rmANOVA, Freq_gammaPower_rmANOVA]
