# Supplementary material for: Chronic alcohol-induced brain states limit propagation of direct cortical stimulation
Source: Sci Rep. 2025 Oct 10;15:35407. doi: 10.1038/s41598-025-21802-z (PMC12514308; doi:10.1038/s41598-025-21802-z)
Supplement: Supplementary file 19 — Supplementary Material 19 [file 41598_2025_21802_MOESM19_ESM.xlsx]

## Sheet: Individual_Descriptives
RatID	Variable	N (cycle)	Mean	Min	Max	SD	SE	CI_low	CI_high
3965	BL5	8	2.27404	1.32107	3.48316	0.826338	0.292154	1.5832	2.96487
3965	BL10	8	1.01646	0.362425	2.05252	0.524857	0.185565	0.577668	1.45525
3965	BL20	8	1.14782	0.66923	2.18713	0.461396	0.163128	0.762082	1.53355
3965	BLTotal	8	4.43832	2.68062	5.78989	1.04909	0.370911	3.56125	5.31538
3965	ADE5	7	2.53197	1.33751	4.13393	1.08333	0.409461	1.53006	3.53389
3965	ADE10	7	1.87655	0.166129	4.22539	1.3937	0.52677	0.58759	3.16551
3965	ADE20	7	1.02252	0.586079	1.79055	0.408922	0.154558	0.644326	1.40071
3965	ADETotal	7	5.43104	3.33471	7.14035	1.23074	0.465175	4.29279	6.56928
3965	Relapse5	7	0.430668	-0.964816	2.55175	1.38627	0.523962	-0.85142	1.71276
3965	Relapse10	7	0.886189	-0.407149	2.96915	1.18714	0.448698	-0.211736	1.98411
3965	Relapse20	7	-0.166154	-0.962723	0.458798	0.473819	0.179087	-0.604364	0.272056
3965	RelapseTotal	7	1.1507	0.0168679	2.95406	1.11271	0.420563	0.121622	2.17978
3966	BL5	8	0.960951	0.396304	1.6383	0.546933	0.19337	0.503704	1.4182
3966	BL10	8	1.82626	0.322053	2.59402	0.759389	0.268484	1.1914	2.46113
3966	BL20	8	0.650757	0.40337	0.895036	0.181712	0.0642448	0.498842	0.802672
3966	BLTotal	8	3.43797	2.62032	4.10706	0.538635	0.190436	2.98766	3.88828
3966	ADE5	7	1.29355	0.0950015	2.98536	1.00455	0.379684	0.364499	2.2226
3966	ADE10	7	2.03363	0.414763	3.16834	0.972586	0.367603	1.13413	2.93312
3966	ADE20	7	2.1292	1.16952	4.15101	1.11006	0.419562	1.10257	3.15583
3966	ADETotal	7	5.45638	4.58583	6.75491	0.751985	0.284224	4.76091	6.15185
3966	Relapse5	7	0.418063	-0.31998	1.4638	0.774643	0.292788	-0.298362	1.13449
3966	Relapse10	7	0.199703	-2.17926	1.73517	1.41343	0.534226	-1.1075	1.50691
3966	Relapse20	7	1.47396	0.31551	3.68498	1.25043	0.472618	0.317502	2.63041
3966	RelapseTotal	7	2.09172	1.18108	3.01147	0.617252	0.233299	1.52086	2.66258
3967	BL5	8	1.32373	0.444451	2.51301	0.772214	0.273019	0.678139	1.96931
3967	BL10	8	0.687082	0.359642	1.24233	0.292842	0.103535	0.44226	0.931904
3967	BL20	8	0.972352	0.0854525	1.46709	0.465787	0.164681	0.582944	1.36176
3967	BLTotal	8	2.98316	1.83856	4.10772	0.739883	0.261588	2.3646	3.60172
3967	ADE5	7	2.17103	0.35016	3.95073	1.08872	0.411496	1.16413	3.17792
3967	ADE10	7	1.17639	0.474633	2.35562	0.595447	0.225058	0.625691	1.72708
3967	ADE20	7	1.65608	0.828194	2.99022	0.73922	0.279399	0.972418	2.33975
3967	ADETotal	7	5.0035	3.78856	6.30934	0.922459	0.348657	4.15037	5.85663
3967	Relapse5	7	1.0172	-0.0942911	2.08673	0.873969	0.330329	0.208913	1.82549
3967	Relapse10	7	0.487379	0.0344463	1.47062	0.489337	0.184952	0.0348173	0.939941
3967	Relapse20	7	0.676412	-0.176153	1.52313	0.608493	0.229989	0.11365	1.23917
3967	RelapseTotal	7	2.18099	0.546492	3.16125	1.00473	0.379751	1.25177	3.11021
3968	BL5	8	0.967805	0.201589	1.86531	0.652546	0.23071	0.422263	1.51335
3968	BL10	8	1.61645	0.47411	3.71183	1.08943	0.385171	0.705665	2.52724
3968	BL20	8	0.725342	0.0287342	1.02163	0.328413	0.116112	0.450782	0.999903
3968	BLTotal	8	3.3096	2.39871	4.65558	0.794885	0.281034	2.64506	3.97414
3968	ADE5	7	1.96804	0.48668	3.37833	0.893609	0.337752	1.14159	2.79449
3968	ADE10	7	1.03362	0.187212	2.01732	0.663458	0.250763	0.420027	1.64722
3968	ADE20	7	0.964671	0.558294	1.4728	0.337403	0.127526	0.652625	1.27672
3968	ADETotal	7	3.96633	3.09068	4.7685	0.66358	0.25081	3.35262	4.58004
3968	Relapse5	7	0.890774	0.0978816	1.81216	0.70799	0.267595	0.235992	1.54556
3968	Relapse10	7	-0.283486	-1.77288	0.951111	0.924355	0.349373	-1.13837	0.571399
3968	Relapse20	7	0.241731	-0.325361	0.641268	0.316811	0.119743	-0.0512702	0.534733
3968	RelapseTotal	7	0.849019	-0.563816	2.36979	1.08361	0.409567	-0.153156	1.85119
3974	BL5	8	0.618207	0.268182	1.04385	0.294823	0.104236	0.371729	0.864686
3974	BL10	8	1.1072	0.46338	2.02025	0.589118	0.208285	0.614684	1.59971
3974	BL20	8	2.12821	1.49774	3.15051	0.638232	0.225649	1.59464	2.66179
3974	BLTotal	8	3.85362	2.62506	4.59603	0.798886	0.282449	3.18573	4.52151
3974	ADE5	7	0.978119	0.38972	1.25878	0.344257	0.130117	0.659734	1.2965
3974	ADE10	7	1.54203	0.684617	3.59513	0.98883	0.373743	0.627511	2.45654
3974	ADE20	7	2.41065	1.41788	3.58125	0.930988	0.35188	1.54963	3.27167
3974	ADETotal	7	4.93079	3.45156	6.42918	1.10304	0.416912	3.91065	5.95094
3974	Relapse5	7	0.309908	-0.00267846	0.84776	0.281965	0.106573	0.0491345	0.570682
3974	Relapse10	7	0.496136	-0.109739	1.57488	0.640824	0.242209	-0.0965275	1.0888
3974	Relapse20	7	0.374455	-0.884071	1.92177	1.02949	0.389111	-0.577664	1.32657
3974	RelapseTotal	7	1.1805	0.251845	2.188	0.741556	0.280282	0.494674	1.86632
3977	BL5	8	0.639019	0.239365	1.24481	0.364242	0.128779	0.334505	0.943532
3977	BL10	8	2.21595	1.22295	3.35329	0.777065	0.274734	1.56631	2.8656
3977	BL20	8	1.18996	0.713292	1.98854	0.519805	0.183779	0.755392	1.62453
3977	BLTotal	8	4.04493	3.47659	4.90991	0.457482	0.161744	3.66247	4.4274
3977	ADE5	7	1.85519	0.0838185	3.26446	1.27261	0.481	0.678226	3.03215
3977	ADE10	7	2.25357	1.25308	3.31514	0.751935	0.284205	1.55815	2.949
3977	ADE20	7	1.35934	0.573172	2.27088	0.581555	0.219807	0.821491	1.89719
3977	ADETotal	7	5.4681	4.95301	6.76063	0.645578	0.244006	4.87104	6.06516
3977	Relapse5	7	1.21707	-0.987568	2.47436	1.36047	0.514208	-0.0411474	2.4753
3977	Relapse10	7	-0.101125	-1.90643	1.62861	1.25248	0.473392	-1.25947	1.05722
3977	Relapse20	7	0.266777	-0.216371	0.869132	0.402455	0.152114	-0.105432	0.638986
3977	RelapseTotal	7	1.38273	0.73325	3.28404	0.884984	0.334492	0.564253	2.2012
3978	BL5	8	0.469522	0.223537	0.816527	0.226187	0.0799691	0.280426	0.658619
3978	BL10	8	1.04955	0.608531	1.84714	0.393125	0.138991	0.720892	1.37821
3978	BL20	8	1.38032	0.922942	2.16233	0.379167	0.134056	1.06332	1.69731
3978	BLTotal	8	2.89939	2.3401	3.40692	0.348518	0.12322	2.60802	3.19076
3978	ADE5	7	0.317031	0.136856	0.637917	0.175521	0.0663408	0.154701	0.479361
3978	ADE10	7	1.53001	0.58301	3.38035	0.974669	0.36839	0.628592	2.43143
3978	ADE20	7	2.50378	1.68883	4.20087	0.855046	0.323177	1.71299	3.29456
3978	ADETotal	7	4.35082	2.96917	5.43858	0.952021	0.35983	3.47034	5.23129
3978	Relapse5	7	-0.187632	-0.434295	0.10956	0.189435	0.0715996	-0.36283	-0.0124342
3978	Relapse10	7	0.493108	-0.718264	2.70229	1.16785	0.441404	-0.586969	1.57318
3978	Relapse20	7	1.1539	-0.103162	3.27792	1.10186	0.416464	0.134853	2.17296
3978	RelapseTotal	7	1.45938	0.135362	3.09848	1.02457	0.387251	0.511812	2.40695
3984	BL5	8	1.24164	0.746108	2.36078	0.522348	0.184678	0.804943	1.67833
3984	BL10	8	1.0812	0.328509	2.2623	0.657924	0.232611	0.531161	1.63124
3984	BL20	8	0.943535	0.660787	1.15783	0.171743	0.0607204	0.799955	1.08712
3984	BLTotal	8	3.26637	2.53942	4.6721	0.669383	0.236663	2.70675	3.82599
3984	ADE5	7	1.69735	0.424135	2.6765	0.905279	0.342163	0.860104	2.53459
3984	ADE10	7	1.12753	0.59524	2.07469	0.499972	0.188972	0.66513	1.58992
3984	ADE20	7	1.39321	0.998467	2.22582	0.496899	0.18781	0.933655	1.85276
3984	ADETotal	7	4.21808	3.44088	4.83464	0.636138	0.240438	3.62975	4.80641
3984	Relapse5	7	0.475328	-1.93665	1.93039	1.29664	0.490083	-0.723862	1.67452
3984	Relapse10	7	0.215056	-0.560502	0.886623	0.61236	0.23145	-0.351283	0.781394
3984	Relapse20	7	0.462147	-0.086778	1.28652	0.527659	0.199436	-0.0258561	0.950151
3984	RelapseTotal	7	1.15253	0.236495	2.21881	0.72682	0.274712	0.480334	1.82473
3993	BL5	8	1.49601	0.576198	2.59024	0.711585	0.251583	0.901105	2.09091
3993	BL10	8	1.01894	0.388439	2.75698	0.880754	0.311393	0.282612	1.75527
3993	BL20	8	1.04481	0.52231	1.29535	0.290083	0.10256	0.802296	1.28733
3993	BLTotal	8	3.55976	2.65593	4.41497	0.693565	0.245212	2.97992	4.13959
3993	ADE5	7	1.5159	0.596007	2.96685	0.937831	0.354467	0.648554	2.38325
3993	ADE10	7	1.66861	0.215222	3.02977	1.06028	0.400747	0.688016	2.6492
3993	ADE20	7	0.744219	0.375111	0.974287	0.201712	0.0762398	0.557666	0.930771
3993	ADETotal	7	3.92873	2.57593	4.79816	0.836377	0.316121	3.15521	4.70225
3993	Relapse5	7	-0.0421991	-1.46603	1.99471	1.10386	0.417221	-1.0631	0.978704
3993	Relapse10	7	0.897959	-0.173217	2.44722	0.999769	0.377877	-0.0266728	1.82259
3993	Relapse20	7	-0.375237	-0.904094	-0.0124663	0.292123	0.110412	-0.645405	-0.105068
3993	RelapseTotal	7	0.480524	-0.599601	1.35082	0.613112	0.231735	-0.0865102	1.04756
3997	BL5	8	0.256174	0.138868	0.478946	0.115426	0.0408091	0.159676	0.352672
3997	BL10	8	0.891753	0.335868	1.82482	0.594142	0.210061	0.395039	1.38847
3997	BL20	8	1.39142	0.837897	2.33894	0.578453	0.204514	0.907826	1.87502
3997	BLTotal	8	2.53935	1.56074	3.37117	0.670841	0.237178	1.97852	3.10019
3997	ADE5	7	1.48145	0.119161	3.05922	1.05144	0.397408	0.509023	2.45387
3997	ADE10	7	0.661919	0.233769	1.49027	0.422057	0.159523	0.271581	1.05226
3997	ADE20	7	1.67166	0.417276	3.52833	1.14363	0.43225	0.613984	2.72934
3997	ADETotal	7	3.81503	2.57227	4.59057	0.803349	0.303638	3.07205	4.558
3997	Relapse5	7	1.2571	-0.228999	2.7649	1.05274	0.397899	0.283472	2.23072
3997	Relapse10	7	-0.198395	-0.815285	0.358089	0.353651	0.133668	-0.525467	0.128678
3997	Relapse20	7	0.233594	-0.91672	1.83375	0.997679	0.377087	-0.689105	1.15629
3997	RelapseTotal	7	1.2923	0.324976	1.7292	0.527243	0.199279	0.804677	1.77991

## Sheet: Overall_Descriptives
Variable	N (rat)	Mean	Min	Max	SD	SE	CI_low	CI_high
BL5	10	1.02471	0.256174	2.27404	0.59063	0.186774	0.602197	1.44722
BL10	10	1.25109	0.687082	2.21595	0.476285	0.150615	0.910371	1.5918
BL20	10	1.15745	0.650757	2.12821	0.419538	0.132669	0.857334	1.45757
BLTotal	10	3.43325	2.53935	4.43832	0.568314	0.179717	3.0267	3.83979
ADE5	10	1.58096	0.317031	2.53197	0.627947	0.198574	1.13176	2.03017
ADE10	10	1.49038	0.661919	2.25357	0.493056	0.155918	1.13767	1.8431
ADE20	10	1.58553	0.744219	2.50378	0.60831	0.192365	1.15037	2.02069
ADETotal	10	4.65688	3.81503	5.4681	0.674435	0.213275	4.17442	5.13934
Relapse5	10	0.578628	-0.187632	1.2571	0.501204	0.158495	0.220088	0.937168
Relapse10	10	0.309252	-0.283486	0.897959	0.418757	0.132423	0.00969143	0.608813
Relapse20	10	0.434159	-0.375237	1.47396	0.556079	0.175848	0.0363637	0.831954
RelapseTotal	10	1.32204	0.480524	2.18099	0.512473	0.162058	0.955438	1.68864

## Sheet: all_cycles
RatID	Cycle	BL5	BL10	BL20	BLTotal	ADE5	ADE10	ADE20	ADETotal	Relapse5	Relapse10	Relapse20	RelapseTotal
3965	1	1.49298	2.05252	1.10163	4.64714	1.33751	2.59507	0.803801	4.73638	-0.155474	0.542546	-0.297831	0.0892408
3966	1	0.57243	1.25041	0.797475	2.62032	0.25245	2.98559	1.34779	4.58583	-0.31998	1.73517	0.550315	1.96551
3967	1	0.444451	0.885006	1.46709	2.79655	0.35016	2.35562	2.99022	5.69601	-0.0942911	1.47062	1.52313	2.89946
3968	1	0.388799	1.52252	0.979641	2.89096	0.48668	2.01732	1.1552	3.6592	0.0978816	0.494799	0.175557	0.768238
3974	1	0.789003	0.656518	3.15051	4.59603	1.22305	0.687131	3.34893	5.25911	0.434046	0.030613	0.198417	0.663077
3977	1	0.433614	2.05826	0.984713	3.47659	2.74609	2.31437	1.70017	6.76063	2.31248	0.256107	0.715459	3.28404
3978	1	0.227335	0.678063	1.43471	2.3401	0.239071	3.38035	1.81916	5.43858	0.0117356	2.70229	0.384455	3.09848
3984	1	1.55136	0.485687	0.787342	2.82439	2.39758	1.25973	1.05285	4.71016	0.846226	0.774042	0.265504	1.88577
3993	1	0.972136	0.388439	1.29535	2.65593	2.96685	0.215222	0.824683	4.00675	1.99471	-0.173217	-0.470669	1.35082
3997	1	0.294312	0.506101	1.51237	2.31279	3.05922	0.379779	0.595653	4.03465	2.7649	-0.126322	-0.91672	1.72186
3965	2	2.09197	1.05495	0.96091	4.10783	4.13393	0.647803	1.17746	5.95919	2.04196	-0.407149	0.216555	1.85136
3966	2	1.6383	0.322053	0.895036	2.85539	2.98536	1.61227	1.26923	5.86685	1.34706	1.29021	0.374194	3.01147
3967	2	0.47148	0.658158	1.38639	2.51603	2.55821	1.18716	1.89618	5.64155	2.08673	0.529	0.509795	3.12553
3968	2	0.295734	1.79348	1.02163	3.11084	2.1079	1.07148	1.4728	4.65218	1.81216	-0.722003	0.451173	1.54133
3974	2	0.890225	2.02025	1.49774	4.40822	1.08057	3.59513	1.51118	6.18688	0.190347	1.57488	0.0134366	1.77867
3977	2	1.24481	2.38857	0.789544	4.42293	3.26446	1.84666	0.573172	5.6843	2.01965	-0.541909	-0.216371	1.26137
3978	2	0.571151	0.970663	1.36572	2.90754	0.136856	1.69451	2.90009	4.73145	-0.434295	0.723842	1.53437	1.82391
3984	2	0.909144	0.911643	1.08524	2.90603	2.01325	0.59524	0.998467	3.60696	1.10411	-0.316403	-0.086778	0.70093
3993	2	2.59024	0.539089	1.28564	4.41497	2.63545	1.31076	0.839184	4.78539	0.0452104	0.771671	-0.446461	0.370421
3997	2	0.200386	1.6775	0.983481	2.86137	2.39849	0.862215	1.32986	4.59057	2.19811	-0.815285	0.346376	1.7292
3965	3	2.32207	0.986372	1.33175	4.6402	1.81116	2.67797	1.79055	6.27968	-0.510908	1.6916	0.458798	1.63949
3966	3	1.29265	2.34838	0.466028	4.10706	0.986998	1.6169	4.15101	6.75491	-0.305655	-0.731484	3.68498	2.64784
3967	3	2.17066	0.359642	0.617799	3.1481	3.95073	0.474633	1.88398	6.30934	1.78007	0.114991	1.26618	3.16125
3968	3	1.22821	0.699093	0.793899	2.7212	1.70934	1.6502	1.09638	4.45592	0.481132	0.951111	0.302482	1.73472
3974	3	0.803551	1.77814	1.65948	4.24117	1.17952	1.6684	3.58125	6.42918	0.375972	-0.109739	1.92177	2.188
3977	3	0.239365	3.15951	0.713292	4.11217	2.71373	1.25308	0.986464	4.95327	2.47436	-1.90643	0.273172	0.841102
3978	3	0.816527	1.30127	0.922942	3.04074	0.637917	0.58301	4.20087	5.42179	-0.178611	-0.718264	3.27792	2.38105
3984	3	0.746108	0.912761	0.880546	2.53942	2.6765	0.693908	1.38782	4.75822	1.93039	-0.218854	0.507269	2.21881
3993	3	2.34629	0.582549	1.27561	4.20445	0.88026	3.02977	0.888128	4.79816	-1.46603	2.44722	-0.38748	0.593712
3997	3	0.163647	0.868589	2.33894	3.37117	0.367751	0.579382	3.52833	4.47546	0.204104	-0.289208	1.18939	1.10429
3965	4	2.34652	1.25624	2.18713	5.78989	1.69056	4.22539	1.2244	7.14035	-0.655962	2.96915	-0.962723	1.35046
3966	4	1.34971	1.63566	0.854013	3.83939	1.76587	2.68848	1.16952	5.62387	0.41616	1.05281	0.31551	1.78448
3967	4	1.23691	1.24233	0.887502	3.36674	1.91564	1.40624	1.69681	5.01869	0.67873	0.16391	0.809311	1.65195
3968	4	0.765226	2.14148	0.989927	3.89663	2.29965	0.368598	0.664566	3.33282	1.53443	-1.77288	-0.325361	-0.563816
3974	4	1.04385	0.46338	2.48974	3.99697	1.12777	1.63889	1.98576	4.75243	0.0839197	1.17551	-0.503979	0.755455
3977	4	0.655085	3.35329	0.901538	4.90991	2.08474	2.68391	0.874512	5.64316	1.42966	-0.669379	-0.0270263	0.73325
3978	4	0.245828	1.84714	1.31396	3.40692	0.355388	1.73084	2.36669	4.45292	0.10956	-0.116301	1.05274	1.046
3984	4	0.983346	1.22763	1.15783	3.3688	0.534129	2.07469	2.22582	4.83464	-0.449216	0.847063	1.068	1.46584
3993	4	1.20891	0.687417	1.2792	3.17553	1.63815	0.562666	0.375111	2.57593	0.429244	-0.124751	-0.904094	-0.599601
3997	4	0.138868	1.82482	1.19278	3.15647	1.57389	1.49027	0.417276	3.48144	1.43503	-0.334544	-0.775506	0.324976
3965	5	1.67648	0.568447	1.07292	3.31784	2.3846	0.166129	0.783979	3.33471	0.708124	-0.402318	-0.288939	0.0168679
3966	5	0.474976	2.39907	0.541997	3.41604	1.10907	1.74905	1.739	4.59712	0.634098	-0.650016	1.197	1.18108
3967	5	0.942321	0.810789	0.0854525	1.83856	2.66351	0.845235	0.828194	4.33694	1.72119	0.0344463	0.742742	2.49838
3968	5	1.75221	0.47411	0.519717	2.74604	2.34517	0.187212	0.558294	3.09068	0.592955	-0.286897	0.0385774	0.344635
3974	5	0.392399	0.760289	1.52442	2.6771	0.38972	1.23732	1.82452	3.45156	-0.00267846	0.477029	0.300105	0.774455
3977	5	1.11163	1.99151	0.767762	3.8709	0.124059	3.31514	1.63689	5.07609	-0.987568	1.32363	0.869132	1.20519
3978	5	0.535353	0.874425	1.09316	2.50294	0.210688	0.665042	2.49162	3.36735	-0.324665	-0.209383	1.39846	0.86441
3984	5	1.05018	0.726218	1.07965	2.85605	1.53264	0.819637	1.08861	3.44088	0.482458	0.093419	0.00895663	0.584834
3993	5	1.28407	0.601629	0.937417	2.82312	0.889229	1.5436	0.618735	3.05156	-0.394843	0.941968	-0.318682	0.228443
3997	5	0.165232	0.434638	0.999029	1.5989	1.11597	0.394056	1.06224	2.57227	0.950741	-0.0405822	0.0632094	0.973368
3965	6	1.32107	0.362425	0.997118	2.68062	3.87283	1.17578	0.586079	5.63468	2.55175	0.813351	-0.411039	2.95406
3966	6	0.404043	2.28787	0.40337	3.09528	0.0950015	3.16834	2.15986	5.42321	-0.309041	0.880477	1.75649	2.32793
3967	6	0.971502	0.414225	1.01896	2.40469	1.90445	1.0413	0.842806	3.78856	0.932947	0.62708	-0.176153	1.38387
3968	6	1.86531	0.504669	0.0287342	2.39871	3.37833	0.720171	0.670002	4.7685	1.51302	0.215502	0.641268	2.36979
3974	6	0.347428	0.648121	1.62951	2.62506	0.587418	0.684617	3.20502	4.47706	0.239991	0.0364963	1.57551	1.85199
3977	6	0.472615	1.22295	1.98854	3.68411	0.0838185	2.85156	2.27088	5.20625	-0.388797	1.62861	0.282332	1.52214
3978	6	0.6993	0.978228	1.15628	2.83381	0.443228	0.837106	1.68883	2.96917	-0.256072	-0.141122	0.532556	0.135362
3984	6	2.36078	0.328509	0.660787	3.35008	0.424135	1.21513	1.94731	3.58657	-1.93665	0.886623	1.28652	0.236495
3993	6	1.92887	0.538896	0.776207	3.24397	1.00538	2.52143	0.689404	4.21621	-0.923491	1.98253	-0.0868032	0.972239
3997	6	0.34816	0.374681	0.837897	1.56074	0.119161	0.233769	2.67164	3.02457	-0.228999	-0.140913	1.83375	1.46383
3965	7	3.45805	0.651554	0.66923	4.77883	2.49323	1.6477	0.791331	4.93227	-0.964816	0.996148	0.122101	0.153433
3966	7	0.396304	2.59402	0.628785	3.61911	1.8601	0.414763	3.06798	5.34285	1.4638	-2.17926	2.4392	1.72374
3967	7	1.83947	0.452915	1.39451	3.6869	1.85449	0.924524	1.45438	4.23339	0.0150122	0.471609	0.0598702	0.546492
3968	7	1.24536	2.08441	0.727034	4.05681	1.4492	1.22038	1.13546	3.80503	0.203839	-0.864034	0.408422	-0.251774
3974	7	0.411019	0.99453	2.30195	3.7075	1.25878	1.28269	1.41788	3.95934	0.84776	0.288156	-0.884071	0.251845
3977	7	0.309685	2.30879	1.50255	4.12102	1.96943	1.51029	1.47329	4.95301	1.65975	-0.798502	-0.0292593	0.831984
3978	7	0.437146	0.608531	2.16233	3.208	0.196068	1.81923	2.05916	4.07446	-0.241078	1.2107	-0.103162	0.866456
3984	7	0.953214	1.79486	0.866037	3.61411	2.30318	1.23436	1.0516	4.58914	1.34997	-0.560502	0.185564	0.975033
3993	7	0.576198	2.05652	0.986753	3.61947	0.596007	2.49681	0.974287	4.0671	0.0198086	0.440286	-0.0124663	0.447628
3997	7	0.259844	0.335868	2.20198	2.79769	1.73563	0.693957	2.09664	4.52623	1.47579	0.358089	-0.105343	1.72853
3965	8	3.48316	1.19916	0.86186	5.54418
3966	8	1.55919	1.77263	0.61935	3.95117
3967	8	2.51301	0.673593	0.921115	4.10772
3968	8	0.201589	3.71183	0.74216	4.65558
3974	8	0.268182	1.53636	2.77235	4.5769
3977	8	0.645346	1.24474	1.87174	3.76182
3978	8	0.223537	1.1381	1.59343	2.95507
3984	8	1.37895	2.2623	1.03085	4.6721
3993	8	1.06133	2.75698	0.52231	4.34062
3997	8	0.478946	1.11183	1.06492	2.6557

## Sheet: rmANOVA
Parameter	num Df	den Df	MSE	F	ges	Pr(>F)	Eta2_partial	CI	CI_low	CI_high
Condition (BL vs. ADE)	1	9	0.0474324	52.611	0.136156	4.79899e-05	0.853922	0.95	0.631228	1
Concentration (5, 10, 20%)	1.64574	14.8117	0.721934	0.0523223	0.00391106	0.922303	0.00577999	0.95	0	1
Condition:Concentration	1.93644	17.428	0.161001	0.815384	0.0158026	0.455064	0.0830721	0.95	0	1

## Sheet: PostHoc_tests
contrast	estimate	SE	df	t.ratio	p.value
Baseline X5 - ADE X5	-0.556254	0.154293	9	-3.60518	0.0114041
Baseline X5 - Baseline X10	-0.226377	0.265903	9	-0.85135	0.507228
Baseline X5 - Baseline X20	-0.132745	0.265938	9	-0.499157	0.734582
ADE X5 - ADE X10	0.0905776	0.25222	9	0.359121	0.75474
ADE X5 - ADE X20	-0.00456967	0.365946	9	-0.0124873	0.990309
Baseline X10 - ADE X10	-0.2393	0.136934	9	-1.74755	0.188561
Baseline X10 - Baseline X20	0.0936322	0.227564	9	0.411455	0.75474
ADE X10 - ADE X20	-0.0951473	0.243353	9	-0.390984	0.75474
Baseline X20 - ADE X20	-0.428079	0.171122	9	-2.5016	0.0630434
Baseline Total - ADE Total	-1.22363	0.168699	9	-7.25334	0.000111976

## Sheet: Relapse_tTest against zero
Concentration	t_value	p_value	df	cohen_d	cohen_d_ci_low	cohen_d_ci_high
Relapse5	3.65077	0.00531113	9	1.15448	0.32404	1.94872
Relapse10	2.33534	0.0443573	9	0.7385	0.0179196	1.42803
Relapse20	2.46895	0.0356317	9	0.78075	0.0503611	1.47919
RelapseTotal	8.1578	1.89302e-05	9	2.57972	1.24102	3.89062
