# Supplementary material for: Chronic alcohol-induced brain states limit propagation of direct cortical stimulation
Source: Sci Rep. 2025 Oct 10;15:35407. doi: 10.1038/s41598-025-21802-z (PMC12514308; doi:10.1038/s41598-025-21802-z)
Supplement: Supplementary file 20 — Supplementary Material 20 [file 41598_2025_21802_MOESM20_ESM.xlsx]

## Sheet: LatP1
Channel	Variable	Mean_AlcStim	Mean_ControlStim	SD_AlcStim	SD_ControlStim	t_value	df	p_value	sig	conf_interval_low	conf_interval_high
PR	LatP1	56.0373	54.5533	8.13805	2.322	0.554521	10.4558	0.590886		-4.44386	7.41186
MR	LatP1	56.7607	54.7453	7.74248	2.62174	0.779642	11.0371	0.451996		-3.67177	7.70243
FR	LatP1	54.552	55.5457	1.14881	1.79899	-1.47212	15.2937	0.161268		-2.42997	0.442641
FC	LatP1	53.4513	54.96	1.17885	2.72273	-1.60797	12.2597	0.133275		-3.54813	0.530793
PC	LatP1	56.567	54.8013	7.3735	2.45213	0.71855	10.9667	0.487446		-3.64474	7.17607
MC	LatP1	57.1443	54.1898	8.11263	2.41991	1.10363	10.589	0.294202		-2.96579	8.87494
FL	LatP1	57.1757	54.7193	7.47276	2.5172	0.985071	11.0165	0.34573		-3.03096	7.94362
ML	LatP1	57.1273	54.583	8.07291	2.70988	0.944842	11.0028	0.365026		-3.38244	8.47111
PL	LatP1	56.7043	54.9907	7.94483	2.71355	0.645479	11.0716	0.531766		-4.12507	7.5524

## Sheet: LatN1
Channel	Variable	Mean_AlcStim	Mean_ControlStim	SD_AlcStim	SD_ControlStim	t_value	df	p_value	sig	conf_interval_low	conf_interval_high
PR	LatN1	79.059	86.6192	9.9901	8.56724	-1.8166	17.5912	0.0863575		-16.3183	1.19785
MR	LatN1	79.9863	90.975	9.46416	11.9915	-2.2747	17.0779	0.0361012	*	-21.1773	-0.800082
FR	LatN1	78.5403	89.0685	6.37238	7.97745	-3.26078	17.1622	0.00455843	*	-17.3353	-3.72104
FC	LatN1	76.988	88.0467	6.73137	7.60375	-3.44361	17.7391	0.00294763	*	-17.8126	-4.30473
PC	LatN1	77.6567	84.9147	8.36617	7.9431	-1.98953	17.9517	0.0620986		-14.9238	0.407829
MC	LatN1	79.3677	86.8133	9.258	7.43536	-1.9829	17.1991	0.0635826		-15.3609	0.46957
FL	LatN1	80.437	88.054	9.74437	6.65184	-2.04157	15.8914	0.0581592		-15.5307	0.296651
ML	LatN1	80.704	87.65	10.6253	7.53098	-1.68658	16.2204	0.11082		-15.667	1.775
PL	LatN1	82.4047	82.4877	9.81809	6.05372	-0.0227553	14.9791	0.982146		-7.8584	7.6924

## Sheet: LatP2
Channel	Variable	Mean_AlcStim	Mean_ControlStim	SD_AlcStim	SD_ControlStim	t_value	df	p_value	sig	conf_interval_low	conf_interval_high
PR	LatP2	103.818	125.992	6.95692	16.5123	-3.91339	12.0975	0.00202921	*	-34.5085	-9.83948
MR	LatP2	105.309	127.808	6.26788	16.7718	-3.97364	11.4658	0.00201499	*	-34.8991	-10.0982
FR	LatP2	107.823	133.493	7.77463	13.2284	-5.29049	14.5548	0.000100243	*	-36.0401	-15.3006
FC	LatP2	103.878	129.977	5.5486	17.5448	-4.48508	10.7825	0.000970366	*	-38.9378	-13.2596
PC	LatP2	103.191	124.659	6.74665	17.5371	-3.61307	11.6069	0.00374744	*	-34.4639	-8.47347
MC	LatP2	104.732	127.138	5.66898	16.1272	-4.14489	11.1907	0.00157253	*	-34.2797	-10.533
FL	LatP2	106.089	130.002	6.70292	17.6	-4.01518	11.557	0.00184467	*	-36.9441	-10.8812
ML	LatP2	106.904	127.827	7.06887	18.1197	-3.40181	11.6775	0.00544791	*	-34.3651	-7.48095
PL	LatP2	112.299	125.635	11.7041	16.3544	-2.09686	16.3032	0.0519418		-26.7969	0.126201

## Sheet: LatN2
Channel	Variable	Mean_AlcStim	Mean_ControlStim	SD_AlcStim	SD_ControlStim	t_value	df	p_value	sig	conf_interval_low	conf_interval_high
PR	LatN2	121.675	141.386	20.6791	15.9303	-2.38785	16.8999	0.0289014	*	-37.1348	-2.28722
MR	LatN2	119.852	142.136	17.1382	15.5415	-3.04593	17.8306	0.0070097	*	-37.6654	-6.90329
FR	LatN2	122.111	143.467	15.6071	10.7725	-3.56117	15.9892	0.00260667	*	-34.0696	-8.64245
FC	LatN2	117.123	139.496	17.7286	15.1138	-3.03691	17.5603	0.00724107	*	-37.8784	-6.86764
PC	LatN2	128.563	139.538	18.6781	15.4374	-1.4322	17.3837	0.169823		-27.1146	5.1653
MC	LatN2	130.886	146.447	25.894	16.0305	-1.61579	15.0152	0.126951		-36.0862	4.96424
FL	LatN2	128.264	146.907	25.0301	32.8497	-1.42753	16.8159	0.171736		-46.2203	8.93364
ML	LatN2	132.191	141.446	22.7528	14.924	-1.07553	15.5346	0.298559		-27.5404	9.03111
PL	LatN2	129.422	148.322	17.9819	28.0964	-1.79171	15.3137	0.0929578		-41.3444	3.54373

## Sheet: LatP3
Channel	Variable	Mean_AlcStim	Mean_ControlStim	SD_AlcStim	SD_ControlStim	t_value	df	p_value	sig	conf_interval_low	conf_interval_high
PR	LatP3	266.821	328.216	91.9594	82.3909	-1.57243	17.787	0.133469		-143.495	20.7052
MR	LatP3	244.55	333.489	83.163	91.2319	-2.27829	17.8478	0.0352477	*	-171.004	-6.87389
FR	LatP3	342.494	344.394	72.2316	77.2672	-0.0567848	17.9189	0.955345		-72.1936	68.3949
FC	LatP3	266.278	328.983	82.0687	93.061	-1.5981	17.7229	0.127697		-145.232	19.8219
PC	LatP3	301.554	351.219	71.7037	68.4497	-1.58432	17.9613	0.13057		-115.534	16.2046
MC	LatP3	280.575	343.533	87.5129	79.3334	-1.68548	17.8294	0.109317		-141.486	15.5718
FL	LatP3	267.927	354.018	93.7326	97.3961	-2.01404	17.9736	0.0592216		-175.906	3.72312
ML	LatP3	279.962	337.674	94.4074	92.7859	-1.37872	17.9946	0.18488		-145.657	30.2326
PL	LatP3	313.182	366.939	96.2263	80.5146	-1.3549	17.4568	0.192726		-137.3	29.7858

## Sheet: AmplP1N1
Channel	Variable	Mean_AlcStim	Mean_ControlStim	SD_AlcStim	SD_ControlStim	t_value	df	p_value	sig	conf_interval_low	conf_interval_high
PR	AmplP1N1	44.7232	70.7746	41.243	23.1048	-1.74265	14.1425	0.103087		-58.0842	5.98135
MR	AmplP1N1	34.5388	70.9755	24.8981	21.2792	-3.518	17.5735	0.00253091	*	-58.2343	-14.6391
FR	AmplP1N1	30.0491	65.2962	14.9982	17.0098	-4.91501	17.7222	0.000116565	*	-50.3305	-20.1638
FC	AmplP1N1	50.2648	67.6182	20.3875	21.196	-1.86593	17.9728	0.0784584		-36.8943	2.1876
PC	AmplP1N1	30.7142	67.7442	20.7602	25.5345	-3.55828	17.2803	0.00236728	*	-58.9592	-15.1008
MC	AmplP1N1	24.7874	65.8328	22.5876	20.6523	-4.24092	17.8575	0.000499262	*	-61.3906	-20.7001
FL	AmplP1N1	29.676	78.0867	23.073	25.3662	-4.46451	17.8408	0.000305573	*	-71.2066	-25.6149
ML	AmplP1N1	26.5353	74.674	21.0699	33.797	-3.82225	15.0778	0.00165172	*	-74.971	-21.3066
PL	AmplP1N1	25.3237	58.1583	28.5627	26.8035	-2.65084	17.9277	0.0162974	*	-58.8653	-6.80408

## Sheet: AmplN1P2
Channel	Variable	Mean_AlcStim	Mean_ControlStim	SD_AlcStim	SD_ControlStim	t_value	df	p_value	sig	conf_interval_low	conf_interval_high
PR	AmplN1P2	19.7538	31.1748	21.6781	16.8103	-1.31656	16.9494	0.205512		-29.7274	6.88552
MR	AmplN1P2	15.4534	32.2114	14.3032	16.8222	-2.39996	17.5463	0.027736	*	-31.4551	-2.06083
FR	AmplN1P2	13.2541	33.9066	4.09489	17.3256	-3.66843	10.0024	0.00432664	*	-33.196	-8.10892
FC	AmplN1P2	22.767	33.7822	10.2416	15.7607	-1.85321	15.4506	0.0830479		-23.6519	1.6217
PC	AmplN1P2	16.5945	33.364	14.6231	20.8193	-2.08437	16.1419	0.0533642		-33.8127	0.273702
MC	AmplN1P2	10.783	31.077	8.94852	17.1714	-3.31428	13.5526	0.00531703	*	-33.4677	-7.12023
FL	AmplN1P2	12.3705	45.5372	8.46496	27.6747	-3.62409	10.6694	0.00419663	*	-53.386	-12.9475
ML	AmplN1P2	11.726	39.2594	6.6001	25.2217	-3.33967	10.2269	0.00727062	*	-45.848	-9.21896
PL	AmplN1P2	11.3809	31.5394	9.86379	18.6073	-3.0269	13.688	0.00925106	*	-34.4729	-5.84404

## Sheet: AmplP2N2
Channel	Variable	Mean_AlcStim	Mean_ControlStim	SD_AlcStim	SD_ControlStim	t_value	df	p_value	sig	conf_interval_low	conf_interval_high
PR	AmplP2N2	5.36184	6.74108	4.84395	3.95122	-0.697726	17.3015	0.494619		-5.54432	2.78584
MR	AmplP2N2	3.65997	6.82298	4.39352	6.46492	-1.27964	15.8518	0.219086		-8.40699	2.08097
FR	AmplP2N2	6.15672	3.42545	3.86302	3.89757	1.57391	17.9986	0.132921		-0.914559	6.3771
FC	AmplP2N2	3.97572	5.02486	5.05654	5.29572	-0.453103	17.9617	0.6559		-5.91447	3.81619
PC	AmplP2N2	7.93814	7.94672	4.92776	5.54927	-0.00365596	17.7519	0.997124		-4.94408	4.92692
MC	AmplP2N2	6.96152	6.63629	6.23873	5.93048	0.119482	17.954	0.90622		-5.39451	6.04497
FL	AmplP2N2	6.05621	6.78828	6.66126	5.41092	-0.269752	17.2744	0.790547		-6.45089	4.98675
ML	AmplP2N2	6.47864	6.31274	4.18655	5.52365	0.0756928	16.7746	0.940559		-4.46303	4.79483
PL	AmplP2N2	4.74866	8.60538	3.4269	3.73502	-2.40603	17.8682	0.0271762	*	-7.22615	-0.487293

## Sheet: AmplN2P3
Channel	Variable	Mean_AlcStim	Mean_ControlStim	SD_AlcStim	SD_ControlStim	t_value	df	p_value	sig	conf_interval_low	conf_interval_high
PR	AmplN2P3	30.2145	35.3429	22.5988	10.347	-0.652489	12.6145	0.525798		-22.1615	11.9046
MR	AmplN2P3	25.3898	37.8756	13.7017	13.461	-2.05561	17.9943	0.0546269		-25.2471	0.2755
FR	AmplN2P3	28.9818	30.31	9.28999	13.5707	-0.255394	15.9164	0.80169		-12.3578	9.70136
FC	AmplN2P3	33.7919	35.5004	11.1702	16.704	-0.268858	15.7079	0.791538		-15.1998	11.7829
PC	AmplN2P3	27.9258	34.7444	7.02987	8.60914	-1.93997	17.3082	0.0688556		-14.2241	0.586908
MC	AmplN2P3	25.3334	36.3124	15.8679	13.1643	-1.68394	17.4065	0.110041		-24.7104	2.75226
FL	AmplN2P3	25.1292	35.8328	15.202	15.7629	-1.54562	17.9764	0.13962		-25.254	3.84691
ML	AmplN2P3	25.853	31.5436	19.0392	15.749	-0.728301	17.3888	0.476123		-22.1478	10.7666
PL	AmplN2P3	21.6269	26.9397	18.0718	11.3758	-0.786761	15.1645	0.443544		-19.6924	9.06678

## Sheet: dB_deltaPower
Channel	Variable	Mean_AlcStim	Mean_ControlStim	SD_AlcStim	SD_ControlStim	t_value	df	p_value	sig	conf_interval_low	conf_interval_high
PR	dB_deltaPower	22.7187	28.6409	6.10728	2.10972	-2.89843	11.1178	0.0143414	*	-10.4137	-1.43087
MR	dB_deltaPower	21.8716	29.2942	5.77188	1.81877	-3.87863	10.7698	0.00267138	*	-11.6456	-3.1995
FR	dB_deltaPower	22.4205	29.2717	2.76024	4.01999	-4.44288	15.943	0.000412515	*	-10.1211	-3.5812
FC	dB_deltaPower	26.5905	29.4265	3.34206	2.9435	-2.01372	17.7173	0.0594825		-5.79811	0.126191
PC	dB_deltaPower	22.6874	28.3745	3.84253	2.49449	-3.92561	15.4417	0.00128273	*	-8.76722	-2.60688
MC	dB_deltaPower	20.6609	28.3381	5.21385	2.28411	-4.26503	12.3318	0.00103374	*	-11.5875	-3.76693
FL	dB_deltaPower	21.8957	30.621	5.69543	3.60343	-4.09394	15.2102	0.000932738	*	-13.2625	-4.18805
ML	dB_deltaPower	21.5272	29.0098	4.85218	3.3516	-4.01241	15.9957	0.00100594	*	-11.436	-3.52916
PL	dB_deltaPower	19.6212	25.7177	5.0602	2.5476	-3.40292	13.287	0.00458421	*	-9.95831	-2.23454

[truncated: 14 more sheets: dB_thetaPower, dB_alphaPower, dB_betaPower, dB_gammaPower, Time_deltaPower, Freq_deltaPower, Time_thetaPower, Freq_thetaPower, Time_alphaPower, Freq_alphaPower, Time_betaPower, Freq_betaPower, Time_gammaPower, Freq_gammaPower]
